# Supplementary material for: Synthesis of a Novel Cysteine-Incorporated Anthraquinone Derivative and Its Structural Properties
Source: MDPI journal article supplement (doi:10.3390/molecules200610192), 2015-06-03
Supplement: s1 [file s1]

PLATON(V-271014)-Run for: A-Co P 21 21 21 R = 0.04 TIME: May 04 19:55:19 2015

(C) 1980-2014 A. L. Spek

=====

Crystal Data

=====

| Input Cell (Lattice Type: P)    |             |          | - Temp = 123K | Reduced Cell (Acta Cryst. (1976), A32, 297-298) |               |         |
|---------------------------------|-------------|----------|---------------|-------------------------------------------------|---------------|---------|
| a =                             | 5.01471(10) | Angstrom | alpha =       | 90 Degree                                       | a =           | 5.015   |
| b =                             | 18.6873(3)  |          | beta =        | 90                                              | b =           | 18.687  |
| c =                             | 25.4365(6)  |          | gamma =       | 90                                              | c =           | 25.437  |
| V = 2383.69(8) Cubic-Angstrom   |             |          | d(100) =      | 5.0147 Angstrom                                 | Niggli Values |         |
|                                 |             |          | d(010) =      | 18.6873                                         | 25.147        | 349.215 |
| Lambda(MoKa) = 0.71075 Angstrom |             |          | d(001) =      | 25.4365                                         | 0.000         | 0.000   |

=====

Orthogonalization Matrices

=====

(See e.g. J.D.Dunitz, Xray Analysis and Structure Determination of Organic Molecules, Cornell Univ. Press, 1979, P236)

(X0) ( 5.01471 0 0 ) (X) , (X) ( 0.19941 0 0 ) (X0) Orthogonal Axes A0, B0 and C0  
 (Y0) = ( 0 18.68730 0 )\*(Y) , (Y) = ( 0 0.05351 0 )\*(Y0) are defined as:  
 (Z0) ( 0 0 25.43650 ) (Z) , (Z) ( 0 0 0.03931 ) (Z0) A0 // A, C0 // C\*, B0 // C0 X A0

=====

Space Group Symmetry

=====

(See e.g. G. Burns & A.M. Glazer, Space Groups for Solid State Scientists, Academic Press, 1990 or Int. Tables A)

Space Group H-M: P212121 Laue: mmm  
 Space Group Hall: P 2ac 2ab [Schoenflies: D2^4 ]  
 Lattice Type: oP, Acentric, Orthorhombic, Multiplicity: 4( 4), No: 19

CHIRAL - See P.G. Jones, Acta Cryst. (1986), A42, 57.

Nr \*\*\*\*\* Symmetry Operation(s) \*\*\*\*\*

|   |           |           |         |
|---|-----------|-----------|---------|
| 1 | X ,       | Y ,       | Z       |
| 2 | 1/2 - X , | - Y ,     | 1/2 + Z |
| 3 | 1/2 + X , | 1/2 - Y , | - Z     |
| 4 | - X ,     | 1/2 + Y , | 1/2 - Z |

ADDSYM - CHECK (cf. MISSYM (C): Le Page, Y., J. Appl. Cryst. (1987), 20, 264-269; J. Appl. Cryst. (1988), 21, 983-984)

- ADDSYM Search on ALL NON-H Chemical Types [Max NonFit 20 Perc]
- Number of Input Atoms Included in Search 36 (Unitcell 144)
- Density based on Input Atom Set = 1.478 g.cm-3 - Vol / Non-H atom = 16.6 Ang+3
- The Structure Implies the Following Symmetry Elements Subject to the Criteria:
- Criteria 1.00 Deg (Metric), 0.25 Ang (Rot.), 0.45 Ang (Inv), 0.45 Ang (Transl)

| Symm. | Input    | Reduced  | (Ang) | (Deg) | Perc | AvrDev. | (Ang) | Input     | Cell |     |     |  |
|-------|----------|----------|-------|-------|------|---------|-------|-----------|------|-----|-----|--|
| Elem  | Cell_Row | Cell_Row | d     | Typ   | Dot  | Angle   | Fit   | MaxDev.   | x    | y   | z   |  |
| 2     | [ 1 0 0] | [ 1 0 0] | 5.01  | 2     | 1    | 0       | 100   | 0 Through | 0    | 1/4 | 1/2 |  |
| 1     |          |          |       |       |      |         |       | 0 Screw   | 1/2  | 0   | 0   |  |
| 2     | [ 0 1 0] | [ 0-1 0] | 18.69 | 2     | 1    | 0       | 100   | 0 Through | 1/2  | 0   | 3/4 |  |
| 1     |          |          |       |       |      |         |       | 0 Screw   | 0    | 1/2 | 0   |  |
| 2     | [ 0 0 1] | [ 0 0 1] | 25.44 | 2     | 1    | 0       | 100   | 0 Through | 3/4  | 1/2 | 0   |  |
| 1     |          |          |       |       |      |         |       | 0 Screw   | 0    | 0   | 1/2 |  |

T. R. A. N. S. F. O. R. M. A. T. I. O. N M. A. T. R. I. X for CELL and HKL DATA

| Reduced->Convent | Input->Reduced | T = Input->Convent: | a' = T a |
|------------------|----------------|---------------------|----------|
| ( 1 0 0 )        | ( 1 0 0 )      | ( 1 0 0 )           | Det(T)   |
| ( 0 -1 0 )       | X ( 0 -1 0 )   | = ( 0 1 0 )         | =        |
| ( 0 0 -1 )       | ( 0 0 -1 )     | ( 0 0 1 )           | 1.000    |

| Cell Lattice | a     | b      | c      | Alpha | Beta  | Gamma | Volume | CrystalSystem | Laue |
|--------------|-------|--------|--------|-------|-------|-------|--------|---------------|------|
| Input oP     | 5.015 | 18.687 | 25.437 | 90.00 | 90.00 | 90.00 | 2384   | orthorhombic  | mmm  |
| Reduced P    | 5.015 | 18.687 | 25.437 | 90.00 | 90.00 | 90.00 | 2384   |               |      |
| Convent oP   | 5.015 | 18.687 | 25.437 | 90.00 | 90.00 | 90.00 | 2384   | orthorhombic  | mmm  |

:: \*\*\* No Obvious Extra Crystallographic Symmetry was Detected \*\*\*

:: Note: Rerun in EQUAL Atom Type Mode for more Checks

(1:19-Rule Rounded) Coordinates of Unique Residue(s) Identified. Standard Deviations in the Last Digit are in Parentheses.

Site = Site Symmetry; SSN = Site Symmetry Number; SSOF = SHELX Site Occupation Factor (= S.O.F / SSN).  
 \*\*\*\*\* Move = Transformation on Input Data: N.IJK (N = SymOp, IJK = Translation) i.e. 1.555 = nomove  
 SYMBOLS: Type = D/A = Potential Donor or Acceptor atom, D-H = H on Donor atom, MET = Metal.  
 \*\*\*\*\* El Type = AK = Alkali Metal, AE = Alkaline Earth, HL = Halogen, AN = Actinide, LN = Lanthanide, TR = Transition Element.  
 ARU = Asymmetric Residue Unit encoded as sklm.nn, with s = symmetry op, klm = translation, nn = residue #.  
 RESIDUE = collection of ARU's constituting an isolated unit (= molecule, ion).  
 FLAGS : d = determined, c = calculated, R = riding G = group

Atom Types : C H N O S  
 Cov. Rad (Ang): 0.68 0.35 0.68 0.68 1.04  
 Atom Volume : 13.87 5.08 11.80 11.39 25.20  
 Atom Number : 6 1 7 8 16  
 Atom Weight : 12.010 1.008 14.01 16.00 32.06  
 Scat. Fact. f0: 5.999 1.000 6.995 7.999 16.000  
 Scat. Fact. f': 0.003 0.000 0.006 0.011 0.125  
 Scat. Fact. f'': 0.002 0.000 0.003 0.006 0.123  
 Mu/Rho (MoKa): 0.58 0.37 0.84 1.22 9.99  
 Elem. Type : -- -- -- -- --

Sources - Cov. Radii : Manual Cambridge Crystallographic Data Base

- Atom Volume: D.W.M. Hofmann (2002). Acta Cryst. B58, 489-493

- Atomic Wt. : SHELXL

NOMOVE

- Scat. Fact.: SHELXL (International Tables)

- mu/rho : International Tables C, Table 4.2.4.2, 193-199 - [Multiply by Atom Weight and 1.66054 for Barns/atom values]

| Flags | Label | Fractional Coordinates (x, y, z) |             |            | Orthogonal Coordinates (X0, Y0, Z0) |             |             | Site SSN*SSOF = |   | S.O.F | Move | Type |
|-------|-------|----------------------------------|-------------|------------|-------------------------------------|-------------|-------------|-----------------|---|-------|------|------|
| d     | S(1)  | 0.72615(12)                      | 0.45508(3)  | 0.74252(2) | 3.6414(6)                           | 8.5042(6)   | 18.8871(5)  | 1               | 1 | 1     | -    | D/A  |
| d     | S(2)  | 0.11009(11)                      | 0.76088(3)  | 0.61998(2) | 0.5521(6)                           | 14.2188(6)  | 15.7701(5)  | 1               | 1 | 1     | -    | D/A  |
| d     | O(1)  | 0.5950(4)                        | 0.41462(8)  | 0.34165(5) | 2.984(2)                            | 7.7481(15)  | 8.6904(13)  | 1               | 1 | 1     | -    | D/A  |
| d     | O(2)  | 0.8653(3)                        | 0.51705(6)  | 0.52992(5) | 4.3392(15)                          | 9.6623(11)  | 13.4793(13) | 1               | 1 | 1     | -    | D/A  |
| d     | O(3)  | 1.3628(3)                        | 0.40269(10) | 0.57261(6) | 6.8340(15)                          | 7.5252(19)  | 14.5652(15) | 1               | 1 | 1     | -    | D/A  |
| d     | O(4)  | 0.8638(4)                        | 0.28464(7)  | 0.67573(6) | 4.332(2)                            | 5.3192(13)  | 17.1882(15) | 1               | 1 | 1     | -    | D/A  |
| d     | O(5)  | 1.2260(3)                        | 0.33814(8)  | 0.70915(6) | 6.1480(15)                          | 6.3189(15)  | 18.0383(15) | 1               | 1 | 1     | -    | D/A  |
| d     | O(6)  | 0.7103(3)                        | 0.66903(7)  | 0.52069(5) | 3.5619(15)                          | 12.5024(13) | 13.2445(13) | 1               | 1 | 1     | -    | D/A  |
| d     | O(7)  | 0.1614(3)                        | 0.56930(7)  | 0.65940(5) | 0.8094(15)                          | 10.6387(13) | 16.7728(13) | 1               | 1 | 1     | -    | D/A  |
| d     | O(8)  | 0.3970(3)                        | 0.64610(7)  | 0.70896(5) | 1.9908(15)                          | 12.0739(13) | 18.0335(13) | 1               | 1 | 1     | -    | D/A  |
| d     | N(1)  | 0.9272(3)                        | 0.39175(8)  | 0.59414(6) | 4.6496(15)                          | 7.3207(15)  | 15.1128(15) | 1               | 1 | 1     | -    | D/A  |
| d     | N(2)  | 0.3927(3)                        | 0.61475(8)  | 0.57017(6) | 1.9693(15)                          | 11.4880(15) | 14.5031(15) | 1               | 1 | 1     | -    | D/A  |
| d     | C(1)  | 0.6300(4)                        | 0.43285(10) | 0.38704(7) | 3.159(2)                            | 8.0888(19)  | 9.8449(18)  | 1               | 1 | 1     | -    | -    |
| d     | C(2)  | 0.8268(4)                        | 0.39436(9)  | 0.42089(7) | 4.146(2)                            | 7.3695(17)  | 10.7060(18) | 1               | 1 | 1     | -    | -    |
| d     | C(3)  | 0.9540(4)                        | 0.33419(10) | 0.40047(8) | 4.784(2)                            | 6.2451(19)  | 10.187(2)   | 1               | 1 | 1     | -    | -    |
| d     | C(4)  | 1.1399(5)                        | 0.29758(10) | 0.43053(8) | 5.716(3)                            | 5.5610(19)  | 10.951(2)   | 1               | 1 | 1     | -    | -    |
| d     | C(5)  | 1.1909(4)                        | 0.31988(10) | 0.48145(8) | 5.972(2)                            | 5.9777(19)  | 12.246(2)   | 1               | 1 | 1     | -    | -    |
| d     | C(6)  | 1.0606(4)                        | 0.37888(9)  | 0.50325(7) | 5.319(2)                            | 7.0802(17)  | 12.8009(18) | 1               | 1 | 1     | -    | -    |
| d     | C(7)  | 0.8819(4)                        | 0.41809(9)  | 0.47201(7) | 4.422(2)                            | 7.8130(17)  | 12.0063(18) | 1               | 1 | 1     | -    | -    |

|    |       |           |             |             |          |             |             |   |   |   |   |     |
|----|-------|-----------|-------------|-------------|----------|-------------|-------------|---|---|---|---|-----|
| d  | C(8)  | 0.7736(4) | 0.48843(9)  | 0.49073(6)  | 3.879(2) | 9.1274(17)  | 12.4825(15) | 1 | 1 | 1 | - | -   |
| d  | C(9)  | 0.5579(4) | 0.52272(9)  | 0.45912(6)  | 2.798(2) | 9.7682(17)  | 11.6784(15) | 1 | 1 | 1 | - | -   |
| d  | C(10) | 0.4304(4) | 0.58437(9)  | 0.47781(7)  | 2.158(2) | 10.9203(17) | 12.1538(18) | 1 | 1 | 1 | - | -   |
| d  | C(11) | 0.2157(4) | 0.61272(10) | 0.44981(7)  | 1.082(2) | 11.4501(19) | 11.4416(18) | 1 | 1 | 1 | - | -   |
| d  | C(12) | 0.1394(4) | 0.58322(10) | 0.40194(8)  | 0.699(2) | 10.8988(19) | 10.224(2)   | 1 | 1 | 1 | - | -   |
| d  | C(13) | 0.2758(4) | 0.52540(10) | 0.38155(7)  | 1.383(2) | 9.8183(19)  | 9.7053(18)  | 1 | 1 | 1 | - | -   |
| d  | C(14) | 0.4829(4) | 0.49434(10) | 0.41026(7)  | 2.422(2) | 9.2379(19)  | 10.4356(18) | 1 | 1 | 1 | - | -   |
| d  | C(15) | 1.1287(4) | 0.39458(9)  | 0.55965(7)  | 5.660(2) | 7.3736(17)  | 14.2355(18) | 1 | 1 | 1 | - | -   |
| d  | C(16) | 0.9681(4) | 0.40581(9)  | 0.65013(7)  | 4.855(2) | 7.5835(17)  | 16.5370(18) | 1 | 1 | 1 | - | -   |
| d  | C(17) | 0.7230(4) | 0.44389(10) | 0.67185(7)  | 3.626(2) | 8.2951(19)  | 17.0895(18) | 1 | 1 | 1 | - | -   |
| d  | C(18) | 1.0102(4) | 0.33530(10) | 0.67921(7)  | 5.066(2) | 6.2659(19)  | 17.2767(18) | 1 | 1 | 1 | - | -   |
| d  | C(19) | 1.2760(5) | 0.27564(15) | 0.74116(10) | 6.399(3) | 5.151(3)    | 18.853(3)   | 1 | 1 | 1 | - | -   |
| d  | C(20) | 0.5274(4) | 0.62575(9)  | 0.52513(7)  | 2.645(2) | 11.6936(17) | 13.3575(18) | 1 | 1 | 1 | - | -   |
| d  | C(21) | 0.4806(4) | 0.64832(9)  | 0.61868(7)  | 2.410(2) | 12.1154(17) | 15.7371(18) | 1 | 1 | 1 | - | -   |
| d  | C(22) | 0.4516(4) | 0.72966(9)  | 0.61812(8)  | 2.265(2) | 13.6354(17) | 15.723(2)   | 1 | 1 | 1 | - | -   |
| d  | C(23) | 0.3275(4) | 0.61577(9)  | 0.66404(7)  | 1.642(2) | 11.5071(17) | 16.8909(18) | 1 | 1 | 1 | - | -   |
| d  | C(24) | 0.2502(6) | 0.62259(11) | 0.75493(8)  | 1.255(3) | 11.635(2)   | 19.203(2)   | 1 | 1 | 1 | - | -   |
| cR | H(1)  | 0.88193   | 0.49110     | 0.74706     | 4.4226   | 9.1773      | 19.0026     | 1 | 1 | 1 | - | D-H |
| cR | H(2)  | 0.03550   | 0.74079     | 0.58269     | 0.1780   | 13.8434     | 14.8216     | 1 | 1 | 1 | - | D-H |
| cR | H(3)  | 0.76613   | 0.38116     | 0.58283     | 3.8419   | 7.1229      | 14.8252     | 1 | 1 | 1 | - | D-H |
| cR | H(4)  | 0.25072   | 0.58708     | 0.57024     | 1.2573   | 10.9709     | 14.5049     | 1 | 1 | 1 | - | D-H |
| cR | H(5)  | 0.91339   | 0.31825     | 0.36592     | 4.5804   | 5.9472      | 9.3077      | 1 | 1 | 1 | - | -   |
| cR | H(6)  | 1.23158   | 0.25752     | 0.41630     | 6.1760   | 4.8124      | 10.5892     | 1 | 1 | 1 | - | -   |
| cR | H(7)  | 1.31750   | 0.29446     | 0.50203     | 6.6069   | 5.5027      | 12.7699     | 1 | 1 | 1 | - | -   |
| cR | H(8)  | 0.12084   | 0.65253     | 0.46358     | 0.6060   | 12.1940     | 11.7919     | 1 | 1 | 1 | - | -   |
| cR | H(9)  | -0.00704  | 0.60294     | 0.38320     | -0.0353  | 11.2673     | 9.7473      | 1 | 1 | 1 | - | -   |
| cR | H(10) | 0.22886   | 0.50678     | 0.34805     | 1.1477   | 9.4704      | 8.8532      | 1 | 1 | 1 | - | -   |
| cR | H(11) | 1.12845   | 0.43696     | 0.65482     | 5.6588   | 8.1656      | 16.6563     | 1 | 1 | 1 | - | -   |
| cR | H(12) | 0.56210   | 0.41633     | 0.66189     | 2.8188   | 7.7801      | 16.8362     | 1 | 1 | 1 | - | -   |
| cR | H(13) | 0.70933   | 0.49163     | 0.65520     | 3.5571   | 9.1872      | 16.6660     | 1 | 1 | 1 | - | -   |
| cR | H(14) | 1.14569   | 0.27370     | 0.76983     | 5.7453   | 5.1147      | 19.5818     | 1 | 1 | 1 | - | -   |
| cR | H(15) | 1.45638   | 0.27836     | 0.75587     | 7.3033   | 5.2018      | 19.2267     | 1 | 1 | 1 | - | -   |
| cR | H(16) | 1.25995   | 0.23250     | 0.71948     | 6.3183   | 4.3448      | 18.3011     | 1 | 1 | 1 | - | -   |
| cR | H(17) | 0.67370   | 0.63678     | 0.62365     | 3.3784   | 11.8997     | 15.8635     | 1 | 1 | 1 | - | -   |
| cR | H(18) | 0.53787   | 0.74852     | 0.58598     | 2.6973   | 13.9878     | 14.9053     | 1 | 1 | 1 | - | -   |
| cR | H(19) | 0.54800   | 0.74958     | 0.64876     | 2.7481   | 14.0076     | 16.5022     | 1 | 1 | 1 | - | -   |
| cR | H(20) | 0.31375   | 0.57521     | 0.76568     | 1.5734   | 10.7491     | 19.4762     | 1 | 1 | 1 | - | -   |
| cR | H(21) | 0.05972   | 0.61999     | 0.74650     | 0.2995   | 11.5859     | 18.9883     | 1 | 1 | 1 | - | -   |
| cR | H(22) | 0.27776   | 0.65668     | 0.78370     | 1.3929   | 12.2716     | 19.9346     | 1 | 1 | 1 | - | -   |

Ordered Structure Unit Cell Contents (Based on Contents of Atom List, that may be Incomplete)

| Resd Site | X(cen) | Y(cen) | Z(cen) | Mol.Wt | S.O.F  | Z | C | H  | N  | O | S |
|-----------|--------|--------|--------|--------|--------|---|---|----|----|---|---|
| 1         | 1      | 0.677  | 0.497  | 0.567  | 530.56 | 1 | 4 | 24 | 22 | 2 | 8 |

Unit Cell Weight = 2122.22 96 88 8 32 8

Calculated Analysis (%) = 54.3 4.2 5.3 24.1 12.1

Moiety\_Formula = C24 H22 N2 O8 S2

Sum\_Formula = C24 H22 N2 O8 S2

Formula\_Weight = 530.56 [Note: Based on SHELXL2014 Atomic Weights]

Formula\_Z = 4

SpaceGroup\_Z = 4 ==> Z' = 4 / 4 = 1.000

Calculated Density = 1.4784(1) g cm<sup>-3</sup> [= Mg m<sup>-3</sup>]

**\*\* WARNING \*\***

Please Check the Derived Crystal Data.

F(000) = 1104.0 [ 1105.56]

They may be Incorrect for Disordered,

Incomplete or Polymeric Structures.

mu(MoKa) = 2.77 cm<sup>-1</sup> = 0.277 mm<sup>-1</sup>

Resonant Scattering = 55 \* 0.0001 - (E. Girard et al. (2003). Acta Cryst. D59, 1914-1922)

Friedif = 90 - (H. Flack & U. Shmueli (2007). Acta Cryst. A63, 257-265)

Predicted Volume = 2439.0[ 2398.5] Ang<sup>3</sup>, 298[123]K - (D.W.M. Hofmann (2002). Acta Cryst. B58, 489-493)

Note on F000: The first number is a pure electron count, the second number between [] is calculated from f, f' & f''

=====

MOLSYM: Search for (additional) Molecular (Point Group) Symmetry – Hydrogen Atoms Excluded ! – Ordered Residues Only !

=====

For Details on the Molecular Symmetry Determination see: T. Pilati & A. Forni, J. Appl. Cryst. (1998), 31, 503–504 & (2000), 33, 417.

For CSM (i.e. Continuous Symmetry Measure), see: H. Zabrodsky et al. (1993) JACS, 115, 8278–8289

\*\*\*\*\* Weighting Mode = ATOMIC \*\*\*\*\*

:: Resd # 1, No Molecular Symmetry Within Tolerance = 0.80 Ang.

:: Resd # 1, No Molecular Symmetry Within Tolerance = 0.80 Ang.

=====

MOLSYM: Search for (additional) Molecular (Point Group) Symmetry – Hydrogen Atoms Excluded ! – Ordered Residues Only !

=====

For Details on the Molecular Symmetry Determination see: T. Pilati & A. Forni, J. Appl. Cryst. (1998), 31, 503–504 & (2000), 33, 417.

For CSM (i.e. Continuous Symmetry Measure), see: H. Zabrodsky et al. (1993) JACS, 115, 8278–8289

\*\*\*\*\* Weighting Mode = UNIT \*\*\*\*\*

:: Resd # 1, No Molecular Symmetry Within Tolerance = 0.80 Ang.

:: Resd # 1, No Molecular Symmetry Within Tolerance = 0.80 Ang.

=====

NONSYM Search for Additional (Non)Crystallographic Symmetry between Residues (Experimental)

=====

- Residue numbers with opposite signs indicate potential enantiomeric pairs
- Hydrogen atoms omitted from the analysis
- Residues with more than 6 atoms are analysed only

| RES# | Coords          | Center of Gravity |          |         | Main axes (hor) |         |      | EigenV  | Asym Angle a, b, c |    |     |  |
|------|-----------------|-------------------|----------|---------|-----------------|---------|------|---------|--------------------|----|-----|--|
| 1    | 0. 6783         | 0. 4966           | 0. 5653  | 0. 835  | 0. 546          | -0. 063 | 9276 | 65. 02  | 33                 | 57 | 94  |  |
|      | 3. 4013         | 9. 2807           | 14. 3802 | -0. 474 | 0. 659          | -0. 584 | 5175 | 85. 75  | 118                | 49 | 126 |  |
|      | Res. Mol. Wt. = |                   | 508. 38  | -0. 278 | 0. 518          | 0. 809  | 4799 | 120. 92 | 106                | 59 | 36  |  |



(An) isotropic, Equivalent and Main Axes Displacement Parameters – Unusual Values Marked with a # – [Optional Coordinate Split-up]

| Atom | Label | U11 or Uiso            | U22                  | U33                   | U23                    | U13                  | U12                   | Ueq(sUeq)   | U1     | U2     | U3     | U3/U1 |
|------|-------|------------------------|----------------------|-----------------------|------------------------|----------------------|-----------------------|-------------|--------|--------|--------|-------|
| 1    | S1    | 0.0331(3)<br>[ 0.7276  | 0.0502(3)<br>0.4596  | 0.0290(3)<br>0.7413]  | -0.0137(2)<br>[ 0.7247 | 0.0015(2)<br>0.4505  | 0.0013(3)<br>0.7437]  | 0.03743(17) | 0.0219 | 0.0334 | 0.0569 | 2.59  |
| 2    | S2    | 0.0266(2)<br>[ 0.1174  | 0.0316(2)<br>0.7618  | 0.0355(3)<br>0.6194]  | -0.0019(2)<br>[ 0.1028 | 0.0002(2)<br>0.7599  | 0.0061(2)<br>0.6205]  | 0.03123(14) | 0.0224 | 0.0342 | 0.0371 | 1.66  |
| 3    | O1    | 0.0499(10)<br>[ 0.6187 | 0.0462(9)<br>0.4160  | 0.0194(7)<br>0.3413]  | -0.0087(6)<br>[ 0.5713 | -0.0103(7)<br>0.4133 | 0.0066(8)<br>0.3420]  | 0.0385(5)   | 0.0149 | 0.0412 | 0.0594 | 4.00  |
| 4    | O2    | 0.0254(7)<br>[ 0.8729  | 0.0223(6)<br>0.5170  | 0.0176(6)<br>0.5298]  | 0.0001(5)<br>[ 0.8577  | -0.0039(5)<br>0.5171 | -0.0003(6)<br>0.5300] | 0.0218(4)   | 0.0160 | 0.0223 | 0.0270 | 1.69  |
| 5    | O3    | 0.0113(6)<br>[ 1.3616  | 0.0662(10)<br>0.4109 | 0.0313(8)<br>0.5719]  | -0.0057(7)<br>[ 1.3640 | -0.0021(6)<br>0.3945 | -0.0009(7)<br>0.5733] | 0.0363(5)   | 0.0110 | 0.0306 | 0.0671 | 6.08  |
| 6    | O4    | 0.0528(9)<br>[ 0.8848  | 0.0235(7)<br>0.2841  | 0.0335(8)<br>0.6754]  | 0.0068(5)<br>[ 0.8428  | -0.0081(7)<br>0.2852 | -0.0100(7)<br>0.6761] | 0.0366(5)   | 0.0190 | 0.0312 | 0.0596 | 3.14  |
| 7    | O5    | 0.0225(7)<br>[ 1.2224  | 0.0441(8)<br>0.3440  | 0.0326(7)<br>0.7115]  | 0.0197(6)<br>[ 1.2296  | -0.0057(6)<br>0.3323 | 0.0027(7)<br>0.7068]  | 0.0331(4)   | 0.0135 | 0.0267 | 0.0589 | 4.35  |
| 8    | O6    | 0.0255(7)<br>[ 0.7196  | 0.0238(6)<br>0.6687  | 0.0274(7)<br>0.5211]  | 0.0002(5)<br>[ 0.7010  | 0.0061(6)<br>0.6693  | -0.0042(6)<br>0.5203] | 0.0256(4)   | 0.0182 | 0.0252 | 0.0334 | 1.84  |
| 9    | O7    | 0.0371(8)<br>[ 0.1784  | 0.0268(7)<br>0.5685  | 0.0256(7)<br>0.6596]  | -0.0015(5)<br>[ 0.1444 | 0.0068(6)<br>0.5701  | -0.0127(6)<br>0.6592] | 0.0298(4)   | 0.0173 | 0.0246 | 0.0476 | 2.75  |
| 10   | O8    | 0.0427(9)<br>[ 0.4148  | 0.0326(7)<br>0.6452  | 0.0199(6)<br>0.7091]  | -0.0021(5)<br>[ 0.3792 | 0.0032(6)<br>0.6470  | -0.0140(7)<br>0.7089] | 0.0317(4)   | 0.0195 | 0.0228 | 0.0530 | 2.72  |
| 11   | N1    | 0.0122(7)<br>[ 0.9200  | 0.0232(7)<br>0.3938  | 0.0187(7)<br>0.5948]  | 0.0038(6)<br>[ 0.9344  | -0.0020(6)<br>0.3897 | -0.0024(6)<br>0.5935] | 0.0180(4)   | 0.0115 | 0.0166 | 0.0261 | 2.27  |
| 12   | N2    | 0.0198(7)<br>[ 0.3853  | 0.0219(7)<br>0.6153  | 0.0225(7)<br>0.5699]  | -0.0016(6)<br>[ 0.4001 | 0.0035(6)<br>0.6142  | -0.0041(7)<br>0.5705] | 0.0214(4)   | 0.0160 | 0.0207 | 0.0275 | 1.72  |
| 13   | C1    | 0.0264(9)<br>[ 0.6220  | 0.0288(9)<br>0.4336  | 0.0186(8)<br>0.3870]  | -0.0006(7)<br>[ 0.6380 | -0.0010(8)<br>0.4321 | -0.0040(8)<br>0.3870] | 0.0246(5)   | 0.0183 | 0.0237 | 0.0318 | 1.73  |
| 14   | C2    | 0.0207(9)<br>[ 0.8213  | 0.0221(8)<br>0.3948  | 0.0198(8)<br>0.4208]  | -0.0003(7)<br>[ 0.8323 | 0.0022(7)<br>0.3939  | -0.0034(7)<br>0.4210] | 0.0209(5)   | 0.0170 | 0.0202 | 0.0254 | 1.49  |
| 15   | C3    | 0.0343(11)<br>[ 0.9678 | 0.0288(10)<br>0.3336 | 0.0197(9)<br>0.4007]  | -0.0057(7)<br>[ 0.9402 | 0.0056(8)<br>0.3348  | -0.0035(9)<br>0.4002] | 0.0276(6)   | 0.0162 | 0.0276 | 0.0390 | 2.41  |
| 16   | C4    | 0.0333(11)<br>[ 1.1534 | 0.0239(9)<br>0.2976  | 0.0323(10)<br>0.4310] | -0.0047(7)<br>[ 1.1264 | 0.0083(9)<br>0.2976  | 0.0041(9)<br>0.4300]  | 0.0298(6)   | 0.0180 | 0.0304 | 0.0411 | 2.29  |
| 17   | C5    | 0.0226(10)<br>[ 1.1984 | 0.0242(9)<br>0.3205  | 0.0301(10)<br>0.4821] | 0.0034(7)<br>[ 1.1834  | 0.0029(8)<br>0.3192  | 0.0037(7)<br>0.4808]  | 0.0256(6)   | 0.0196 | 0.0239 | 0.0333 | 1.70  |
| 18   | C6    | 0.0134(8)<br>[ 1.0664  | 0.0216(8)<br>0.3798  | 0.0233(9)<br>0.5045]  | 0.0015(7)<br>[ 1.0548  | 0.0028(6)<br>0.3780  | -0.0019(7)<br>0.5020] | 0.0194(5)   | 0.0121 | 0.0217 | 0.0244 | 2.01  |
| 19   | C7    | 0.0144(8)<br>[ 0.8763  | 0.0213(8)<br>0.4193  | 0.0172(8)<br>0.4721]  | 0.0010(6)<br>[ 0.8875  | 0.0016(7)<br>0.4168  | -0.0027(7)<br>0.4719] | 0.0176(5)   | 0.0127 | 0.0179 | 0.0223 | 1.75  |
| 20   | C8    | 0.0156(8)<br>[ 0.7691  | 0.0196(8)<br>0.4893  | 0.0153(7)<br>0.4909]  | 0.0025(6)<br>[ 0.7781  | -0.0006(6)<br>0.4876 | -0.0020(7)<br>0.4905] | 0.0168(4)   | 0.0141 | 0.0150 | 0.0215 | 1.53  |
| 21   | C9    | 0.0149(8)              | 0.0204(8)            | 0.0168(8)             | 0.0043(6)              | 0.0012(6)            | -0.0016(7)            | 0.0174(5)   | 0.0125 | 0.0163 | 0.0233 | 1.87  |

|    |     |            |            |            |            |             |             |           |        |        |        |      |
|----|-----|------------|------------|------------|------------|-------------|-------------|-----------|--------|--------|--------|------|
|    |     | [ 0.5553   | 0.5246     | 0.4598]    | [ 0.5605   | 0.5208      | 0.4585]     |           |        |        |        |      |
| 22 | C10 | 0.0170(8)  | 0.0225(8)  | 0.0194(8)  | 0.0049(7)  | 0.0036(7)   | -0.0020(7)  | 0.0196(5) | 0.0123 | 0.0205 | 0.0261 | 2.13 |
|    |     | [ 0.4331   | 0.5866     | 0.4788]    | [ 0.4277   | 0.5821      | 0.4769]     |           |        |        |        |      |
| 23 | C11 | 0.0187(9)  | 0.0255(9)  | 0.0266(9)  | 0.0078(7)  | 0.0038(7)   | 0.0021(8)   | 0.0236(5) | 0.0169 | 0.0190 | 0.0350 | 2.07 |
|    |     | [ 0.2242   | 0.6143     | 0.4508]    | [ 0.2072   | 0.6111      | 0.4489]     |           |        |        |        |      |
| 24 | C12 | 0.0195(9)  | 0.0313(10) | 0.0295(10) | 0.0129(8)  | -0.0032(8)  | -0.0024(8)  | 0.0268(6) | 0.0172 | 0.0192 | 0.0440 | 2.56 |
|    |     | [ 0.1306   | 0.5861     | 0.4034]    | [ 0.1482   | 0.5804      | 0.4005]     |           |        |        |        |      |
| 25 | C13 | 0.0231(9)  | 0.0307(9)  | 0.0207(8)  | 0.0052(7)  | -0.0055(8)  | -0.0057(8)  | 0.0248(5) | 0.0162 | 0.0213 | 0.0370 | 2.28 |
|    |     | [ 0.2641   | 0.5268     | 0.3819]    | [ 0.2875   | 0.5240      | 0.3812]     |           |        |        |        |      |
| 26 | C14 | 0.0200(9)  | 0.0246(9)  | 0.0179(8)  | 0.0030(7)  | -0.0013(7)  | -0.0052(7)  | 0.0208(5) | 0.0162 | 0.0173 | 0.0289 | 1.78 |
|    |     | [ 0.4751   | 0.4952     | 0.4104]    | [ 0.4907   | 0.4935      | 0.4101]     |           |        |        |        |      |
| 27 | C15 | 0.0144(8)  | 0.0209(8)  | 0.0244(9)  | 0.0028(6)  | -0.0020(7)  | 0.0006(7)   | 0.0199(5) | 0.0138 | 0.0197 | 0.0261 | 1.89 |
|    |     | [ 1.1242   | 0.3957     | 0.5609]    | [ 1.1332   | 0.3934      | 0.5584]     |           |        |        |        |      |
| 28 | C16 | 0.0154(8)  | 0.0200(8)  | 0.0208(8)  | 0.0024(6)  | -0.0017(7)  | -0.0004(7)  | 0.0187(5) | 0.0149 | 0.0182 | 0.0232 | 1.55 |
|    |     | [ 0.9641   | 0.4067     | 0.6507]    | [ 0.9721   | 0.4049      | 0.6495]     |           |        |        |        |      |
| 29 | C17 | 0.0193(9)  | 0.0289(9)  | 0.0248(9)  | -0.0021(7) | -0.0017(8)  | 0.0024(8)   | 0.0243(5) | 0.0185 | 0.0240 | 0.0305 | 1.65 |
|    |     | [ 0.7285   | 0.4453     | 0.6715]    | [ 0.7175   | 0.4425      | 0.6722]     |           |        |        |        |      |
| 30 | C18 | 0.0240(9)  | 0.0265(9)  | 0.0179(8)  | 0.0013(7)  | 0.0008(7)   | 0.0039(8)   | 0.0228(5) | 0.0177 | 0.0212 | 0.0295 | 1.67 |
|    |     | [ 1.0175   | 0.3360     | 0.6793]    | [ 1.0029   | 0.3346      | 0.6791]     |           |        |        |        |      |
| 31 | C19 | 0.0372(12) | 0.0612(15) | 0.0399(12) | 0.0319(11) | -0.0009(11) | 0.0121(12)  | 0.0461(8) | 0.0141 | 0.0382 | 0.0860 | 6.08 |
|    |     | [ 1.2974   | 0.2822     | 0.7436]    | [ 1.2546   | 0.2691      | 0.7387]     |           |        |        |        |      |
| 32 | C20 | 0.0196(8)  | 0.0188(8)  | 0.0219(9)  | 0.0036(7)  | 0.0029(7)   | 0.0035(7)   | 0.0201(5) | 0.0155 | 0.0179 | 0.0269 | 1.73 |
|    |     | [ 0.5348   | 0.6263     | 0.5255]    | [ 0.5200   | 0.6252      | 0.5248]     |           |        |        |        |      |
| 33 | C21 | 0.0210(9)  | 0.0220(8)  | 0.0215(8)  | -0.0001(7) | 0.0037(7)   | -0.0021(7)  | 0.0215(5) | 0.0171 | 0.0218 | 0.0256 | 1.50 |
|    |     | [ 0.4749   | 0.6486     | 0.6185]    | [ 0.4863   | 0.6481      | 0.6189]     |           |        |        |        |      |
| 34 | C22 | 0.0234(9)  | 0.0205(9)  | 0.0278(9)  | -0.0001(7) | 0.0033(8)   | -0.0019(7)  | 0.0239(5) | 0.0193 | 0.0227 | 0.0297 | 1.54 |
|    |     | [ 0.4579   | 0.7296     | 0.6186]    | [ 0.4453   | 0.7298      | 0.6177]     |           |        |        |        |      |
| 35 | C23 | 0.0251(10) | 0.0192(8)  | 0.0219(9)  | 0.0003(7)  | 0.0031(7)   | -0.0015(7)  | 0.0221(5) | 0.0184 | 0.0207 | 0.0272 | 1.48 |
|    |     | [ 0.3333   | 0.6157     | 0.6642]    | [ 0.3217   | 0.6158      | 0.6639]     |           |        |        |        |      |
| 36 | C24 | 0.0578(14) | 0.0354(11) | 0.0206(9)  | -0.0014(8) | 0.0083(10)  | -0.0092(11) | 0.0379(7) | 0.0188 | 0.0323 | 0.0627 | 3.33 |
|    |     | [ 0.2727   | 0.6220     | 0.7551]    | [ 0.2277   | 0.6232      | 0.7547]     |           |        |        |        |      |
| 37 | H1  | 0.05780    |            |            |            |             |             | 0.05780   |        |        |        |      |
| 38 | H2  | 0.04700    |            |            |            |             |             | 0.04700   |        |        |        |      |
| 39 | H3  | 0.02160    |            |            |            |             |             | 0.02160   |        |        |        |      |
| 40 | H4  | 0.02570    |            |            |            |             |             | 0.02570   |        |        |        |      |
| 41 | H5  | 0.03310    |            |            |            |             |             | 0.03310   |        |        |        |      |
| 42 | H6  | 0.03580    |            |            |            |             |             | 0.03580   |        |        |        |      |
| 43 | H7  | 0.03070    |            |            |            |             |             | 0.03070   |        |        |        |      |
| 44 | H8  | 0.02830    |            |            |            |             |             | 0.02830   |        |        |        |      |
| 45 | H9  | 0.03210    |            |            |            |             |             | 0.03210   |        |        |        |      |
| 46 | H10 | 0.02980    |            |            |            |             |             | 0.02980   |        |        |        |      |
| 47 | H11 | 0.02250    |            |            |            |             |             | 0.02250   |        |        |        |      |
| 48 | H12 | 0.02920    |            |            |            |             |             | 0.02920   |        |        |        |      |
| 49 | H13 | 0.02920    |            |            |            |             |             | 0.02920   |        |        |        |      |
| 50 | H14 | 0.05540    |            |            |            |             |             | 0.05540   |        |        |        |      |
| 51 | H15 | 0.05540    |            |            |            |             |             | 0.05540   |        |        |        |      |
| 52 | H16 | 0.05540    |            |            |            |             |             | 0.05540   |        |        |        |      |
| 53 | H17 | 0.02580    |            |            |            |             |             | 0.02580   |        |        |        |      |

The Displacement Factor has the Form of  $\text{Exp}(-T)$

$$T = 8 * (\pi^2) * U_{iso} * \sin(\theta / \lambda)^2, \text{ for Isotropic Atoms,}$$
$$T = 2*(\pi^{**2})*(U11*(h*as)**2+U22*(k*bs)**2+U33*(l*cs)**2+2*U23*k*l*bs*cs+2*U13*h*l*as*cs+2*U12*h*k*as*bs), \text{ for Anisotr. Atoms}$$

$$U_{eq} = 1/3 \sum(i, j) (U_{ij} * a_s(i) * a_s(j) * a(i) * a(j))$$

U1, U2, U3 are the three Main Axes Components of  $U_{ij}$

Reference U(eq): R. X. Fischer & E. Tillmanns, *Acta Cryst.* (1988). C44, 775–776

Ueq [or U(iso)] Averages per Element

|         | Non-H  | C      | H      | N      | O      | S      |
|---------|--------|--------|--------|--------|--------|--------|
| Average | 0.0259 | 0.0239 | 0.0368 | 0.0197 | 0.0317 | 0.0343 |
| Minimum | 0.0168 | 0.0168 | 0.0216 | 0.0180 | 0.0218 | 0.0312 |
| Maximum | 0.0461 | 0.0461 | 0.0578 | 0.0214 | 0.0385 | 0.0374 |
| Ratio   | 2.7440 | 2.7440 | 2.6759 | 1.1889 | 1.7661 | 1.1985 |
| Number  | 36     | 24     | 22     | 2      | 8      | 2      |

V. Schomaker and K. N. Trueblood Rigid Body Motion Analysis, TLS - Model (Acta Cryst. (1968), B24, 63-76) - see also Dunitz, p244

Observed Vibration Tensor in Inertial System I(1) = L, I(2) = M, I(3) = N (Difference U(calc) - U(obs) in Parentheses)

| Label | U(L, L)<br>U11                       | U(L, M)<br>U12                         | U(L, N)<br>U13                         | U(M, M)<br>U22                       | U(M, N)<br>U23                         | U(N, N)<br>U33                       | Ueq(obs) | Ueq(cal) |
|-------|--------------------------------------|----------------------------------------|----------------------------------------|--------------------------------------|----------------------------------------|--------------------------------------|----------|----------|
| S(1)  | 0.02247[0.00748]<br>0.03310[0.00220] | -0.00373[-.00854]<br>0.00130[-.00423]  | 0.00084[0.00059]<br>0.00150[-.00351]   | 0.04968[-.02044]<br>0.05020[-.01040] | -0.01063[0.01089]<br>-0.01370[0.01735] | 0.04015[-.00629]<br>0.02900[-.01104] | 0.0374   | 0.0310   |
| S(2)  | 0.03033[-.00271]<br>0.02660[0.00944] | 0.00560[0.00409]<br>0.00610[-.00464]   | 0.00204[0.00197]<br>0.00020[0.01157]   | 0.02957[0.00947]<br>0.03160[-.00808] | -0.00449[0.01309]<br>-0.00190[-.00016] | 0.03380[-.00124]<br>0.03550[0.00416] | 0.0312   | 0.0331   |
| O(1)  | 0.02438[-.00052]<br>0.04990[-.01113] | -0.01061[0.00104]<br>0.00660[-.00883]  | -0.00834[0.00524]<br>-0.01030[0.00803] | 0.03475[0.00054]<br>0.04620[-.00795] | -0.00733[0.00630]<br>-0.00870[0.00441] | 0.05638[-.01935]<br>0.01940[-.00024] | 0.0385   | 0.0321   |
| O(2)  | 0.02138[0.00011]<br>0.02540[-.01206] | -0.00365[0.00126]<br>-0.00030[-.00421] | -0.00323[0.00431]<br>-0.00390[0.00371] | 0.01934[0.00090]<br>0.02230[-.00116] | -0.00026[-.00102]<br>0.00010[0.00125]  | 0.02457[-.01308]<br>0.01760[0.00116] | 0.0218   | 0.0177   |
| O(3)  | 0.03554[-.00120]<br>0.01130[0.00438] | -0.00881[0.00816]<br>-0.00090[0.00129] | 0.01047[-.00556]<br>-0.00210[0.00013]  | 0.04572[-.02327]<br>0.06620[-.03365] | -0.02323[0.01748]<br>-0.00570[0.01082] | 0.02754[-.00656]<br>0.03130[-.00176] | 0.0363   | 0.0259   |
| O(4)  | 0.04452[-.00595]<br>0.05280[-.02228] | -0.00678[0.00387]<br>-0.01000[0.01203] | -0.01295[0.01844]<br>-0.00810[0.00800] | 0.03003[-.01001]<br>0.02350[0.00770] | 0.01289[-.00956]<br>0.00680[0.00469]   | 0.03525[-.00346]<br>0.03350[-.00484] | 0.0366   | 0.0301   |
| O(5)  | 0.05320[-.00658]<br>0.02250[0.00913] | -0.00723[-.00171]<br>0.00270[0.00075]  | 0.01046[-.00610]<br>-0.00570[-.00239]  | 0.01531[0.00567]<br>0.04410[0.00150] | -0.00444[-.00087]<br>0.01970[-.00764]  | 0.03069[0.00826]<br>0.03260[-.00327] | 0.0331   | 0.0355   |
| O(6)  | 0.02492[0.00089]<br>0.02550[-.00569] | 0.00098[-.00063]<br>-0.00420[-.00135]  | 0.00255[-.00163]<br>0.00610[-.00345]   | 0.03126[-.00609]<br>0.02380[-.00377] | 0.00463[-.00133]<br>0.00020[0.00192]   | 0.02052[-.00611]<br>0.02740[-.00185] | 0.0256   | 0.0218   |
| O(7)  | 0.02615[-.00427]<br>0.03710[-.01355] | -0.00551[0.00516]<br>-0.01270[0.01010] | -0.00180[0.00640]<br>0.00680[-.00002]  | 0.04156[-.01177]<br>0.02680[-.00114] | 0.01040[-.00726]<br>-0.00150[0.00158]  | 0.02179[-.00069]<br>0.02560[-.00205] | 0.0298   | 0.0243   |
| O(8)  | 0.02589[-.00563]<br>0.04270[-.00497] | -0.01214[0.00898]<br>-0.01400[0.00952] | -0.00427[0.00341]<br>0.00320[0.00291]  | 0.04267[-.00143]<br>0.03260[-.00170] | 0.00925[-.00449]<br>-0.00210[-.00426]  | 0.02664[0.00471]<br>0.01990[0.00432] | 0.0317   | 0.0310   |
| N(1)  | 0.02418[0.00176]<br>0.01220[0.00469] | -0.00302[0.00077]<br>-0.00240[0.00067] | 0.00227[-.00040]<br>-0.00200[0.00061]  | 0.01666[0.00232]<br>0.02320[0.00087] | -0.00304[0.00150]<br>0.00380[-.00009]  | 0.01326[0.00410]<br>0.01870[0.00262] | 0.0180   | 0.0208   |
| N(2)  | 0.02040[0.00145]<br>0.01980[-.00238] | -0.00005[0.00028]<br>-0.00410[0.00053] | 0.00108[0.00026]<br>0.00350[-.00122]   | 0.02736[-.00430]<br>0.02190[-.00199] | 0.00137[-.00009]<br>-0.00160[0.00234]  | 0.01644[-.00180]<br>0.02250[-.00028] | 0.0214   | 0.0198   |
| C(1)  | 0.02303[-.00098]<br>0.02640[0.00205] | -0.00630[-.00004]<br>-0.00400[0.00147] | -0.00099[-.00030]<br>-0.00100[-.00024] | 0.02718[0.00120]<br>0.02880[0.00175] | -0.00009[-.00086]<br>-0.00060[-.00141] | 0.02358[0.00341]<br>0.01860[-.00016] | 0.0246   | 0.0258   |
| C(2)  | 0.02022[-.00006]<br>0.02070[0.00462] | -0.00180[-.00063]<br>-0.00340[0.00188] | 0.00089[-.00045]<br>0.00220[-.00043]   | 0.02457[0.00305]<br>0.02210[0.00418] | 0.00142[-.00111]<br>-0.00030[-.00185]  | 0.01780[0.00636]<br>0.01980[0.00056] | 0.0209   | 0.0240   |
| C(3)  | 0.01698[0.00353]<br>0.03430[-.00074] | -0.00397[0.00395]<br>-0.00350[0.00424] | -0.00025[0.00113]<br>0.00560[-.00069]  | 0.03661[-.00203]<br>0.02880[0.00033] | 0.00404[-.00178]<br>-0.00570[0.00105]  | 0.02921[0.00347]<br>0.01970[0.00538] | 0.0276   | 0.0293   |
| C(4)  | 0.02128[0.00217]<br>0.03330[-.00075] | 0.00741[-.00285]<br>0.00410[-.00033]   | 0.00238[0.00162]<br>0.00830[-.00079]   | 0.03454[-.00046]<br>0.02390[0.00438] | 0.00433[-.00140]<br>-0.00470[0.00189]  | 0.03369[0.00043]<br>0.03230[-.00150] | 0.0298   | 0.0305   |
| C(5)  | 0.02842[-.00228]<br>0.02260[0.00165] | 0.00445[-.00021]<br>0.00370[-.00035]   | 0.00451[0.00067]<br>0.00290[0.00214]   | 0.02253[0.00461]<br>0.02420[0.00233] | 0.00063[0.00002]<br>0.00340[-.00245]   | 0.02594[0.00147]<br>0.03010[-.00018] | 0.0256   | 0.0269   |
| C(6)  | 0.02263[0.00105]<br>0.01340[0.00465] | 0.00134[-.00059]<br>-0.00190[0.00179]  | 0.00384[-.00059]<br>0.00280[-.00087]   | 0.02192[0.00059]<br>0.02160[0.00223] | -0.00093[0.00008]<br>0.00150[-.00006]  | 0.01375[0.00565]<br>0.02330[0.00041] | 0.0194   | 0.0219   |
| C(7)  | 0.01898[0.00161]<br>0.01440[0.00368] | -0.00206[0.00070]<br>-0.00270[0.00071] | 0.00257[-.00098]<br>0.00160[-.00034]   | 0.02015[0.00236]<br>0.02130[0.00141] | -0.00070[0.00018]<br>0.00100[-.00086]  | 0.01377[0.00374]<br>0.01720[0.00262] | 0.0176   | 0.0202   |
| C(8)  | 0.01942[0.00106]<br>0.01560[-.00097] | -0.00307[0.00060]<br>-0.00200[-.00155] | 0.00119[0.00007]<br>-0.00060[0.00072]  | 0.01623[0.00368]<br>0.01960[0.00155] | -0.00022[-.00072]<br>0.00250[-.00128]  | 0.01486[-.00160]<br>0.01530[0.00256] | 0.0168   | 0.0179   |

|       |                  |                   |                   |                  |                   |                  |        |        |
|-------|------------------|-------------------|-------------------|------------------|-------------------|------------------|--------|--------|
| C(9)  | 0.02114[0.00101] | -0.00239[-.00122] | 0.00360[-.00269]  | 0.01629[0.00347] | 0.00052[-.00160]  | 0.01467[0.00080] | 0.0174 | 0.0191 |
|       | 0.01490[0.00172] | -0.00160[-.00168] | 0.00120[-.00218]  | 0.02040[0.00247] | 0.00430[-.00234]  | 0.01680[0.00109] |        |        |
| C(10) | 0.02311[0.00131] | -0.00193[-.00021] | 0.00537[-.00357]  | 0.01968[-.00066] | 0.00193[-.00238]  | 0.01611[-.00072] | 0.0196 | 0.0196 |
|       | 0.01700[-.00072] | -0.00200[-.00071] | 0.00360[-.00406]  | 0.02250[-.00031] | 0.00490[-.00144]  | 0.01940[0.00097] |        |        |
| C(11) | 0.02992[0.00093] | 0.00136[-.00366]  | 0.00794[-.00505]  | 0.01914[-.00017] | 0.00121[-.00284]  | 0.02174[-.00079] | 0.0236 | 0.0236 |
|       | 0.01870[0.00054] | 0.00210[-.00260]  | 0.00380[-.00583]  | 0.02550[0.00162] | 0.00780[-.00177]  | 0.02660[-.00219] |        |        |
| C(12) | 0.04215[-.00681] | -0.00400[-.00231] | 0.00521[-.00372]  | 0.01783[0.00276] | -0.00073[-.00367] | 0.02032[0.00661] | 0.0268 | 0.0276 |
|       | 0.01950[0.00414] | -0.00240[0.00217] | -0.00320[-.00283] | 0.03130[0.00344] | 0.01290[-.00646]  | 0.02950[-.00503] |        |        |
| C(13) | 0.03204[-.00108] | -0.00858[-.00018] | -0.00102[0.00011] | 0.02209[0.00166] | -0.00163[-.00259] | 0.02038[0.00736] | 0.0248 | 0.0275 |
|       | 0.02310[0.00338] | -0.00570[0.00370] | -0.00550[-.00083] | 0.03070[0.00467] | 0.00520[-.00219]  | 0.02070[-.00010] |        |        |
| C(14) | 0.02445[-.00023] | -0.00577[-.00043] | 0.00027[-.00069]  | 0.02150[0.00145] | 0.00042[-.00248]  | 0.01655[0.00528] | 0.0208 | 0.0230 |
|       | 0.02000[0.00247] | -0.00520[0.00233] | -0.00130[-.00154] | 0.02460[0.00382] | 0.00300[-.00191]  | 0.01790[0.00021] |        |        |
| C(15) | 0.02576[0.00164] | 0.00168[-.00236]  | 0.00126[0.00200]  | 0.01699[0.00332] | -0.00279[-.00003] | 0.01694[0.00128] | 0.0199 | 0.0220 |
|       | 0.01440[0.00143] | 0.00060[-.00113]  | -0.00200[0.00133] | 0.02090[0.00502] | 0.00280[0.00072]  | 0.02440[-.00022] |        |        |
| C(16) | 0.02306[0.00672] | -0.00012[-.00550] | 0.00072[0.00094]  | 0.01670[0.00349] | -0.00165[-.00097] | 0.01644[0.00541] | 0.0187 | 0.0239 |
|       | 0.01540[0.00532] | -0.00040[-.00140] | -0.00170[-.00184] | 0.02000[0.00991] | 0.00240[0.00259]  | 0.02080[0.00039] |        |        |
| C(17) | 0.02379[0.00191] | 0.00046[-.00713]  | 0.00107[0.00024]  | 0.02452[-.00201] | -0.00589[0.00551] | 0.02470[-.00348] | 0.0243 | 0.0231 |
|       | 0.01930[0.00340] | 0.00240[-.00583]  | -0.00170[0.00031] | 0.02890[-.00035] | -0.00210[0.00542] | 0.02480[-.00662] |        |        |
| C(18) | 0.02029[0.01718] | -0.00219[-.00344] | 0.00320[0.00095]  | 0.02001[-.00043] | -0.00098[-.00016] | 0.02811[0.00255] | 0.0228 | 0.0292 |
|       | 0.02400[0.00334] | 0.00390[-.00233]  | 0.00080[-.00429]  | 0.02650[0.00818] | 0.00130[0.00840]  | 0.01790[0.00778] |        |        |
| C(19) | 0.06907[-.01079] | -0.00927[-.00029] | 0.02248[-.01462]  | 0.01592[0.00443] | -0.00117[-.00262] | 0.05331[-.00098] | 0.0461 | 0.0437 |
|       | 0.03720[0.00427] | 0.01210[-.00375]  | -0.00090[-.00770] | 0.06120[-.00745] | 0.03190[-.01305]  | 0.03990[-.00416] |        |        |
| C(20) | 0.02160[0.00164] | 0.00267[-.00300]  | 0.00412[-.00278]  | 0.01669[0.00477] | 0.00181[-.00043]  | 0.02201[-.00811] | 0.0201 | 0.0195 |
|       | 0.01960[-.00272] | 0.00350[-.00736]  | 0.00290[-.00141]  | 0.01880[0.00087] | 0.00360[-.00147]  | 0.02190[0.00015] |        |        |
| C(21) | 0.02045[0.00075] | -0.00016[0.00007] | 0.00219[-.00277]  | 0.02504[0.00453] | 0.00189[0.00089]  | 0.01900[-.00058] | 0.0215 | 0.0231 |
|       | 0.02100[0.00264] | -0.00210[-.00280] | 0.00370[-.00038]  | 0.02200[-.00026] | -0.00010[-.00224] | 0.02150[0.00232] |        |        |
| C(22) | 0.02448[-.00028] | 0.00301[0.00072]  | 0.00067[-.00216]  | 0.02674[0.01014] | 0.00291[0.00351]  | 0.02048[0.00366] | 0.0239 | 0.0284 |
|       | 0.02340[0.00841] | -0.00190[-.00278] | 0.00330[0.00296]  | 0.02050[0.00117] | -0.00010[-.00393] | 0.02780[0.00394] |        |        |
| C(23) | 0.02071[-.00040] | 0.00047[-.00157]  | 0.00034[0.00111]  | 0.02387[0.00836] | 0.00420[-.00083]  | 0.02161[0.00128] | 0.0221 | 0.0251 |
|       | 0.02510[0.00199] | -0.00150[-.00209] | 0.00310[0.00238]  | 0.01920[0.00619] | 0.00030[-.00291]  | 0.02190[0.00106] |        |        |
| C(24) | 0.02518[-.00446] | -0.01173[0.00686] | -0.00185[0.00463] | 0.04681[0.00029] | 0.01540[-.00838]  | 0.04181[-.00100] | 0.0379 | 0.0362 |
|       | 0.05780[-.01157] | -0.00920[0.00678] | 0.00830[0.00202]  | 0.03540[0.00260] | -0.00140[-.00465] | 0.02060[0.00381] |        |        |

---

$$R1 = \text{Sum}(\text{abs}(U(\text{obs}) - U(\text{calc}))) / \text{Sum}(\text{abs}(U(\text{obs}))) = 0.23000$$

$$R2 = \text{Sqrt}(\text{Sum}((U(\text{obs}) - U(\text{calc}))^2) / \text{Sum}(U(\text{obs})^2)) = 0.26105$$

$$S = \text{Sqrt}(\text{Sum}((U(\text{obs}) - U(\text{calc}))^2) / (6 * N - NS * M)) = 0.00552$$

$$N = \text{Number of Atoms in Rigid Group} = 36$$

$$NS = \text{Symmetry Factor} = 1$$

$$M = \text{Number of Rigid-Body Parameters} = 20$$

$$\text{Largest abs}(U(\text{obs}) - U(\text{calc})) = 0.02327$$

TLS-Mode

:: No TLS-Analysis for Residue Nr: 1, Because  $R > 0.25$

## Rigid-Body Model Libration Corrections for Bond Distances and "Hirshfeld Rigid-Bond" Test (Acta Cryst., 1976, A32, 239-244)

| MSDA from U(obs) |         |               |                              |        |        |        |                                      |            |            |            |                      |      |      |
|------------------|---------|---------------|------------------------------|--------|--------|--------|--------------------------------------|------------|------------|------------|----------------------|------|------|
| Bond             |         | Bond Distance | Components of the Correction |        |        |        | Vibration Along the Interatomic Bond |            |            |            | Angle with Lib. Axes |      |      |
| Atom(I)          | Atom(J) | Obsd          | Calcd                        | Del(L) | Del(M) | Del(N) | I to J                               | J to I     | Difference | Sqrt(Diff) | L(1)                 | L(2) | L(3) |
| S(1)             | - C(17) | 1.8098(19)    | 0                            | 0      | 0      | 0      | 0.0262(3)                            | 0.0244(9)  | 0.0018(9)  | 0.0424     | 0.00                 | 0.00 | 0.00 |
| S(2)             | - C(22) | 1.810(2)      | 0                            | 0      | 0      | 0      | 0.0234(2)                            | 0.0241(9)  | 0.0007(9)  | 0.0265     | 0.00                 | 0.00 | 0.00 |
| O(1)             | - C(1)  | 1.217(2)      | 0                            | 0      | 0      | 0      | 0.0152(9)                            | 0.0186(9)  | 0.0034(12) | 0.0583     | 0.00                 | 0.00 | 0.00 |
| O(2)             | - C(8)  | 1.221(2)      | 0                            | 0      | 0      | 0      | 0.0172(6)                            | 0.0169(8)  | 0.0003(10) | 0.0173     | 0.00                 | 0.00 | 0.00 |
| O(3)             | - C(15) | 1.229(2)      | 0                            | 0      | 0      | 0      | 0.0119(8)                            | 0.0145(8)  | 0.0026(12) | 0.0510     | 0.00                 | 0.00 | 0.00 |
| O(4)             | - C(18) | 1.201(3)      | 0                            | 0      | 0      | 0      | 0.0249(8)                            | 0.0295(9)  | 0.0046(12) | 0.0678     | 0.00                 | 0.00 | 0.00 |
| O(5)             | - C(18) | 1.324(2)      | 0                            | 0      | 0      | 0      | 0.0216(7)                            | 0.0231(9)  | 0.0015(11) | 0.0387     | 0.00                 | 0.00 | 0.00 |
| O(5)             | - C(19) | 1.446(3)      | 0                            | 0      | 0      | 0      | 0.0200(7)                            | 0.0211(13) | 0.0011(15) | 0.0332     | 0.00                 | 0.00 | 0.00 |
| O(6)             | - C(20) | 1.228(2)      | 0                            | 0      | 0      | 0      | 0.0198(7)                            | 0.0219(8)  | 0.0021(11) | 0.0458     | 0.00                 | 0.00 | 0.00 |
| O(7)             | - C(23) | 1.209(2)      | 0                            | 0      | 0      | 0      | 0.0198(7)                            | 0.0210(9)  | 0.0012(12) | 0.0346     | 0.00                 | 0.00 | 0.00 |
| O(8)             | - C(23) | 1.322(2)      | 0                            | 0      | 0      | 0      | 0.0206(7)                            | 0.0229(9)  | 0.0023(12) | 0.0480     | 0.00                 | 0.00 | 0.00 |
| O(8)             | - C(24) | 1.450(3)      | 0                            | 0      | 0      | 0      | 0.0210(7)                            | 0.0226(11) | 0.0016(13) | 0.0400     | 0.00                 | 0.00 | 0.00 |
| N(1)             | - C(15) | 1.339(2)      | 0                            | 0      | 0      | 0      | 0.0167(7)                            | 0.0206(8)  | 0.0039(11) | 0.0624     | 0.00                 | 0.00 | 0.00 |
| N(1)             | - C(16) | 1.463(2)      | 0                            | 0      | 0      | 0      | 0.0194(7)                            | 0.0210(8)  | 0.0016(11) | 0.0400     | 0.00                 | 0.00 | 0.00 |
| N(2)             | - C(20) | 1.346(2)      | 0                            | 0      | 0      | 0      | 0.0186(7)                            | 0.0184(8)  | 0.0002(11) | 0.0141     | 0.00                 | 0.00 | 0.00 |
| N(2)             | - C(21) | 1.453(2)      | 0                            | 0      | 0      | 0      | 0.0217(7)                            | 0.0228(8)  | 0.0011(11) | 0.0332     | 0.00                 | 0.00 | 0.00 |
| C(1)             | - C(2)  | 1.494(3)      | 0                            | 0      | 0      | 0      | 0.0265(9)                            | 0.0247(8)  | 0.0018(12) | 0.0424     | 0.00                 | 0.00 | 0.00 |
| C(1)             | - C(14) | 1.488(3)      | 0                            | 0      | 0      | 0      | 0.0297(9)                            | 0.0287(9)  | 0.0010(12) | 0.0316     | 0.00                 | 0.00 | 0.00 |
| C(2)             | - C(3)  | 1.393(3)      | 0                            | 0      | 0      | 0      | 0.0231(8)                            | 0.0259(10) | 0.0028(13) | 0.0529     | 0.00                 | 0.00 | 0.00 |
| C(2)             | - C(7)  | 1.401(3)      | 0                            | 0      | 0      | 0      | 0.0203(8)                            | 0.0184(8)  | 0.0019(12) | 0.0436     | 0.00                 | 0.00 | 0.00 |
| C(3)             | - C(4)  | 1.386(3)      | 0                            | 0      | 0      | 0      | 0.0381(10)                           | 0.0367(10) | 0.0014(14) | 0.0374     | 0.00                 | 0.00 | 0.00 |
| C(4)             | - C(5)  | 1.384(3)      | 0                            | 0      | 0      | 0      | 0.0323(10)                           | 0.0327(10) | 0.0004(14) | 0.0200     | 0.00                 | 0.00 | 0.00 |
| C(5)             | - C(6)  | 1.396(3)      | 0                            | 0      | 0      | 0      | 0.0231(10)                           | 0.0214(8)  | 0.0017(13) | 0.0412     | 0.00                 | 0.00 | 0.00 |
| C(6)             | - C(7)  | 1.404(3)      | 0                            | 0      | 0      | 0      | 0.0212(8)                            | 0.0195(8)  | 0.0017(12) | 0.0412     | 0.00                 | 0.00 | 0.00 |
| C(6)             | - C(15) | 1.504(3)      | 0                            | 0      | 0      | 0      | 0.0243(8)                            | 0.0240(8)  | 0.0003(12) | 0.0173     | 0.00                 | 0.00 | 0.00 |
| C(7)             | - C(8)  | 1.500(2)      | 0                            | 0      | 0      | 0      | 0.0219(8)                            | 0.0214(8)  | 0.0005(11) | 0.0224     | 0.00                 | 0.00 | 0.00 |
| C(8)             | - C(9)  | 1.492(3)      | 0                            | 0      | 0      | 0      | 0.0159(8)                            | 0.0164(8)  | 0.0005(11) | 0.0224     | 0.00                 | 0.00 | 0.00 |
| C(9)             | - C(10) | 1.401(2)      | 0                            | 0      | 0      | 0      | 0.0221(8)                            | 0.0241(8)  | 0.0020(11) | 0.0447     | 0.00                 | 0.00 | 0.00 |
| C(9)             | - C(14) | 1.403(2)      | 0                            | 0      | 0      | 0      | 0.0203(8)                            | 0.0193(9)  | 0.0010(12) | 0.0316     | 0.00                 | 0.00 | 0.00 |
| C(10)            | - C(11) | 1.395(3)      | 0                            | 0      | 0      | 0      | 0.0205(8)                            | 0.0205(9)  | 0.0000(12) | 0          | 0.00                 | 0.00 | 0.00 |
| C(10)            | - C(20) | 1.511(3)      | 0                            | 0      | 0      | 0      | 0.0252(8)                            | 0.0264(8)  | 0.0012(12) | 0.0346     | 0.00                 | 0.00 | 0.00 |
| C(11)            | - C(12) | 1.390(3)      | 0                            | 0      | 0      | 0      | 0.0336(9)                            | 0.0359(10) | 0.0023(13) | 0.0480     | 0.00                 | 0.00 | 0.00 |
| C(12)            | - C(13) | 1.380(3)      | 0                            | 0      | 0      | 0      | 0.0388(10)                           | 0.0370(9)  | 0.0018(13) | 0.0424     | 0.00                 | 0.00 | 0.00 |
| C(13)            | - C(14) | 1.396(3)      | 0                            | 0      | 0      | 0      | 0.0207(9)                            | 0.0211(9)  | 0.0004(12) | 0.0200     | 0.00                 | 0.00 | 0.00 |
| C(16)            | - C(17) | 1.524(3)      | 0                            | 0      | 0      | 0      | 0.0192(8)                            | 0.0206(9)  | 0.0014(12) | 0.0374     | 0.00                 | 0.00 | 0.00 |
| C(16)            | - C(18) | 1.526(3)      | 0                            | 0      | 0      | 0      | 0.0180(8)                            | 0.0225(9)  | 0.0045(12) | 0.0671     | 0.00                 | 0.00 | 0.00 |
| C(21)            | - C(22) | 1.527(2)      | 0                            | 0      | 0      | 0      | 0.0224(8)                            | 0.0209(9)  | 0.0015(12) | 0.0387     | 0.00                 | 0.00 | 0.00 |
| C(21)            | - C(23) | 1.514(3)      | 0                            | 0      | 0      | 0      | 0.0178(8)                            | 0.0191(9)  | 0.0013(12) | 0.0361     | 0.00                 | 0.00 | 0.00 |

---

$$\text{Sqrt}(\text{Sum}(\text{DeI} \text{I} \text{J}^{**2}) / \text{Nrb}) = 0.0020$$

# - Indicates bonds exceeding the 5.0 sigma test level



Test Matrix for Rigid-Body Vibrations -  $\Delta(A, B) = \sqrt{Z(A, B)^2 - Z(B, A)^2}$  Should be Near Zero (Acta Cryst. A34, 1978, 828)

| Atom-Atom |   | 1  | 2  | 3  | 4  | 5  | 6  | 7  | 8  | 9  | 10 | 11 | 12 | 13 | 14 | 15 | 16 | 17 | 18 | 19 | 20 | 21 | 22 | 23 | 24 | 25 | 26 | 27 | 28 | 29 | 30 | 31 | 32 | 33 | 34 | 35 | 36 |
|-----------|---|----|----|----|----|----|----|----|----|----|----|----|----|----|----|----|----|----|----|----|----|----|----|----|----|----|----|----|----|----|----|----|----|----|----|----|----|
| 1 S(1)    | - | 0  | 24 | 10 | 16 | 1  | 3  | 4  | 23 | 2  | 6  | 1  | 21 | 10 | 6  | 7  | 2  | 6  | 2  | 9  | 17 | 19 | 22 | 19 | 17 | 16 | 15 | 1  | 1  | -2 | 7  | 2  | 28 | 30 | 31 | 27 | 11 |
| 2 S(2)    | - | 7  | 0  | 3  | 1  | 18 | 5  | 0  | 3  | 3  | 9  | 2  | 3  | 3  | 5  | 4  | 7  | 2  | 4  | 5  | 4  | 6  | 5  | 0  | 9  | 1  | 3  | 4  | 7  | 1  | 4  | 2  | 7  | 0  | -1 | 7  | 3  |
| 3 O(1)    | - | 10 | 10 | 0  | 1  | 4  | 5  | 4  | 1  | 2  | 2  | 0  | 1  | -3 | 2  | 5  | 3  | 1  | 3  | 1  | 1  | 2  | 0  | 4  | 0  | 1  | 0  | 3  | 3  | 7  | 1  | 4  | 1  | 1  | 2  | 1  | 1  |
| 4 O(2)    | - | 6  | 6  | 5  | 0  | 14 | 1  | 3  | 4  | 3  | 5  | 2  | 4  | 2  | 1  | 2  | 4  | 0  | 1  | 0  | 0  | 0  | 0  | 0  | 0  | 1  | 1  | 4  | 0  | 8  | 1  | 4  | 8  | 3  | 1  | 3  | 2  |
| 5 O(3)    | - | 5  | 9  | 7  | 3  | 0  | 6  | 14 | 22 | 16 | 7  | 1  | 9  | 2  | 0  | 2  | 0  | 0  | 1  | 3  | 11 | 11 | 12 | 12 | 10 | 7  | 5  | -3 | 3  | 1  | 15 | 25 | 24 | 17 | 23 | 9  | 10 |
| 6 O(4)    | - | 4  | 10 | 9  | 6  | 4  | 0  | 1  | 4  | 2  | 6  | 5  | 1  | 7  | 8  | 12 | 8  | 11 | 10 | 9  | 8  | 9  | 6  | 8  | 10 | 8  | 8  | 7  | 0  | 2  | -5 | 4  | 8  | 4  | 5  | 13 | 0  |
| 7 O(5)    | - | 3  | 10 | 10 | 6  | 4  | 2  | 0  | 12 | 24 | 15 | 2  | 10 | 1  | 3  | 9  | 4  | 4  | 2  | 3  | 1  | 1  | 6  | 7  | 4  | 2  | 1  | 0  | 3  | 2  | -1 | -1 | 1  | 1  | 2  | 2  | 15 |
| 8 O(6)    | - | 7  | 4  | 7  | 3  | 6  | 8  | 8  | 0  | 0  | 3  | 6  | 2  | 2  | 3  | 2  | 6  | 4  | 4  | 3  | 4  | 2  | 2  | 0  | 2  | 6  | 4  | 9  | 10 | 4  | 6  | 11 | -2 | 3  | 0  | 2  | 3  |
| 9 O(7)    | - | 4  | 4  | 9  | 5  | 7  | 6  | 7  | 5  | 0  | 1  | 18 | 1  | 3  | 7  | 10 | 13 | 11 | 14 | 11 | 9  | 6  | 6  | 1  | 2  | 1  | 3  | 18 | 27 | 25 | 24 | 21 | 2  | 0  | 1  | -1 | 1  |
| 10 O(8)   | - | 4  | 3  | 10 | 6  | 7  | 7  | 7  | 5  | 2  | 0  | 13 | 2  | 1  | 5  | 10 | 12 | 9  | 11 | 8  | 6  | 1  | 2  | 8  | 11 | 3  | 1  | 15 | 24 | 17 | 22 | 11 | 2  | 1  | 1  | -2 | -2 |
| 11 N(1)   | - | 4  | 8  | 7  | 3  | 2  | 3  | 3  | 6  | 5  | 6  | 0  | 5  | 3  | 2  | 3  | 1  | 4  | 1  | 0  | 2  | 0  | 3  | 3  | 2  | 2  | 3  | -4 | -2 | 1  | 2  | 0  | 4  | 1  | 2  | 2  | 11 |
| 12 N(2)   | - | 6  | 3  | 7  | 3  | 6  | 7  | 8  | 2  | 3  | 4  | 5  | 0  | 2  | 1  | 0  | 4  | 1  | 3  | 1  | 0  | 1  | 0  | 4  | 7  | 2  | 2  | 7  | 10 | 1  | 6  | 9  | 0  | -1 | 2  | 0  | 2  |
| 13 C(1)   | - | 9  | 9  | -1 | 4  | 6  | 8  | 9  | 6  | 8  | 9  | 6  | 6  | 0  | -2 | 5  | 0  | 4  | 0  | 2  | 2  | 1  | 1  | 4  | 1  | 0  | -1 | 1  | 0  | 6  | 2  | 1  | 1  | 1  | 0  | 0  | 1  |
| 14 C(2)   | - | 8  | 9  | 2  | 4  | 5  | 7  | 8  | 6  | 8  | 9  | 4  | 6  | -1 | 0  | -3 | 1  | 2  | 1  | -2 | 1  | 1  | 1  | 2  | 1  | 2  | 2  | 0  | 0  | 5  | 3  | 2  | 2  | 0  | 2  | 0  | 4  |
| 15 C(3)   | - | 9  | 11 | 3  | 5  | 5  | 7  | 8  | 7  | 9  | 10 | 5  | 7  | 2  | -1 | 0  | -1 | 0  | 5  | 2  | 1  | 4  | 2  | 7  | 6  | 5  | 5  | 5  | 4  | 8  | 2  | 8  | 3  | 2  | 2  | 2  | 8  |
| 16 C(4)   | - | 9  | 11 | 4  | 5  | 4  | 6  | 7  | 8  | 9  | 10 | 5  | 8  | 4  | 2  | -1 | 0  | 0  | 2  | 3  | 3  | 0  | 3  | 1  | 0  | 1  | 1  | 0  | 3  | 1  | 11 | 2  | 1  | 3  | 4  | 2  | 9  |
| 17 C(5)   | - | 7  | 10 | 5  | 4  | 3  | 5  | 6  | 7  | 8  | 9  | 3  | 7  | 4  | 3  | 2  | -1 | 0  | -2 | 1  | 0  | 1  | 2  | 0  | 1  | 3  | 3  | 4  | 7  | 4  | 11 | 3  | 5  | 2  | 1  | 3  | 6  |
| 18 C(6)   | - | 6  | 9  | 5  | 3  | 2  | 5  | 5  | 6  | 7  | 8  | 2  | 6  | 4  | 2  | 3  | 2  | -1 | 0  | -2 | 1  | 3  | 1  | 1  | 1  | 0  | 0  | 0  | 1  | 3  | 5  | 1  | 5  | 0  | 0  | 0  | 9  |
| 19 C(7)   | - | 7  | 8  | 4  | 2  | 4  | 6  | 6  | 5  | 7  | 8  | 3  | 5  | 3  | -1 | 2  | 3  | 2  | -1 | 0  | 0  | 2  | 1  | 1  | 0  | 2  | 2  | 1  | 3  | 8  | 0  | 1  | 4  | 1  | 1  | 2  | 7  |
| 20 C(8)   | - | 6  | 7  | 4  | -1 | 4  | 6  | 7  | 3  | 5  | 7  | 3  | 4  | 3  | 3  | 4  | 4  | 4  | 3  | -1 | 0  | -1 | 3  | 1  | 2  | 2  | 3  | 0  | 4  | 11 | 4  | 0  | 4  | 0  | 2  | 2  | 5  |
| 21 C(9)   | - | 7  | 6  | 4  | 2  | 5  | 7  | 8  | 3  | 6  | 7  | 5  | 3  | 3  | 3  | 4  | 5  | 5  | 4  | 3  | -1 | 0  | -2 | 1  | 1  | 1  | -1 | 0  | 2  | 10 | 4  | 1  | 0  | 0  | 1  | 2  | 1  |
| 22 C(10)  | - | 7  | 5  | 5  | 3  | 6  | 8  | 8  | 2  | 5  | 6  | 5  | 2  | 4  | 4  | 6  | 7  | 6  | 5  | 4  | 3  | -1 | 0  | 0  | 1  | 2  | 0  | 5  | 2  | 8  | 1  | 5  | -1 | 1  | 0  | 1  | 0  |
| 23 C(11)  | - | 8  | 5  | 5  | 4  | 8  | 9  | 10 | 3  | 5  | 7  | 7  | 3  | 4  | 5  | 7  | 8  | 7  | 6  | 5  | 4  | 2  | -1 | 0  | -2 | 0  | 3  | 4  | 4  | 4  | 0  | 5  | 4  | 7  | 7  | 5  | 6  |
| 24 C(12)  | - | 9  | 6  | 4  | 5  | 8  | 10 | 11 | 4  | 7  | 8  | 7  | 5  | 4  | 5  | 6  | 7  | 7  | 7  | 5  | 4  | 3  | 2  | -1 | 0  | -2 | 1  | 2  | 1  | 5  | 2  | 2  | 3  | 8  | 10 | 8  | 10 |
| 25 C(13)  | - | 10 | 8  | 3  | 5  | 8  | 9  | 10 | 5  | 7  | 9  | 7  | 5  | 2  | 4  | 5  | 6  | 7  | 6  | 4  | 4  | 2  | 3  | 2  | -1 | 0  | 0  | 2  | 1  | 7  | 1  | 1  | 4  | 1  | 0  | 1  | 3  |
| 26 C(14)  | - | 9  | 8  | 2  | 4  | 6  | 8  | 9  | 4  | 7  | 8  | 6  | 5  | -1 | 3  | 4  | 5  | 5  | 4  | 3  | 3  | -1 | 2  | 3  | 2  | -1 | 0  | 2  | 1  | 7  | 1  | 1  | 2  | 0  | 1  | 0  | 0  |
| 27 C(15)  | - | 5  | 9  | 6  | 3  | -1 | 4  | 4  | 6  | 6  | 7  | -1 | 6  | 5  | 4  | 4  | 4  | 2  | -2 | 3  | 3  | 5  | 5  | 7  | 7  | 7  | 5  | 0  | 3  | 0  | 4  | 3  | 2  | 2  | 2  | 1  | 12 |
| 28 C(16)  | - | 3  | 8  | 8  | 4  | 3  | 2  | 2  | 6  | 5  | 6  | -1 | 5  | 7  | 6  | 6  | 6  | 5  | 4  | 5  | 4  | 6  | 6  | 7  | 8  | 8  | 7  | 2  | 0  | -1 | -5 | 2  | 1  | 6  | 4  | 4  | 21 |
| 29 C(17)  | - | -2 | 7  | 8  | 4  | 4  | 3  | 3  | 6  | 4  | 4  | 2  | 4  | 7  | 6  | 7  | 7  | 6  | 5  | 5  | 5  | 6  | 6  | 7  | 8  | 8  | 7  | 4  | -2 | 0  | 2  | 2  | 10 | 4  | 5  | 2  | 17 |
| 30 C(18)  | - | 3  | 9  | 9  | 5  | 3  | -1 | -1 | 8  | 6  | 7  | 2  | 7  | 8  | 7  | 7  | 6  | 5  | 5  | 6  | 6  | 7  | 8  | 9  | 10 | 9  | 8  | 3  | -2 | 2  | 0  | 3  | 5  | 2  | 0  | 0  | 24 |
| 31 C(19)  | - | 4  | 11 | 11 | 7  | 5  | 3  | -1 | 10 | 8  | 8  | 5  | 9  | 10 | 9  | 9  | 8  | 7  | 6  | 8  | 8  | 9  | 10 | 11 | 12 | 11 | 10 | 5  | 4  | 5  | 2  | 0  | 0  | 1  | 5  | 5  | 10 |
| 32 C(20)  | - | 6  | 4  | 6  | 3  | 6  | 8  | 8  | -1 | 4  | 5  | 5  | -1 | 5  | 5  | 7  | 7  | 7  | 5  | 4  | 3  | 3  | -2 | 2  | 4  | 4  | 4  | 5  | 6  | 5  | 7  | 9  | 0  | 1  | 1  | 0  | 2  |
| 33 C(21)  | - | 5  | 3  | 8  | 4  | 6  | 7  | 7  | 3  | 2  | 2  | 5  | -1 | 7  | 7  | 8  | 9  | 8  | 7  | 6  | 5  | 5  | 4  | 5  | 6  | 7  | 6  | 6  | 5  | 4  | 7  | 9  | 2  | 0  | -2 | -1 | 0  |
| 34 C(22)  | - | 6  | -2 | 9  | 5  | 8  | 9  | 9  | 3  | 3  | 3  | 7  | 2  | 8  | 8  | 10 | 10 | 9  | 8  | 7  | 6  | 6  | 4  | 5  | 6  | 7  | 7  | 7  | 7  | 6  | 8  | 10 | 3  | -2 | 0  | 2  | 2  |
| 35 C(23)  | - | 4  | 3  | 9  | 5  | 7  | 7  | 7  | 4  | -1 | -1 | 5  | 2  | 8  | 8  | 9  | 9  | 8  | 7  | 7  | 5  | 6  | 5  | 5  | 7  | 7  | 7  | 6  | 5  | 4  | 6  | 8  | 4  | -2 | 3  | 0  | 2  |
| 36 C(24)  | - | 4  | 4  | 11 | 7  | 8  | 7  | 7  | 6  | 3  | -1 | 7  | 5  | 10 | 10 | 11 | 11 | 10 | 9  | 9  | 8  | 8  | 7  | 8  | 9  | 10 | 9  | 8  | 6  | 5  | 7  | 8  | 6  | 4  | 4  | 2  | 0  |

Remarks

- Upper Triangle Entries Represent /Del (A, B)/\*1000 Values
- Lower Triangle Entries Represent Distances (A-B) Angstrom
- Negative Entries Indicate Bonded Atoms

---



---

Analysis of Bond Distance and Angle Values – Identification of Chiral Center(s) and Their (R/S)-Configuration (Cahn-Ingold-Prelog)

---



---

The Following Tests are done. Faults are Marked Under Note

-- V : Valency Check Fault for H, C

-- S : Bond Too Short

-- A : Unusual Bond Angle Values (PLEASE CHECK)

---

\*\*\* PLEASE NOTE: R/S ASSIGNMENTS ARE TENTATIVE \*\*\* (CIP Special rules NOT Implemented)

\*\*\* See Angew. Chem. Intern. Ed. Eng., (1966), 5, 385 & (1982), 21, 567 for Authoritative Details for Special Cases

---

|      |       |                                                             |       |       |       |       |       |       |       | =A. N. G. L. E. S= |     |     |       | =B. O. N. D. S= |       |     |     |     |    |      |
|------|-------|-------------------------------------------------------------|-------|-------|-------|-------|-------|-------|-------|--------------------|-----|-----|-------|-----------------|-------|-----|-----|-----|----|------|
| Flag | Label | - Connected to (May be Incomplete for Polymeric Structures) |       |       |       |       |       |       |       | nra                | min | max | Aver  | min             | max   | nrb | tnr | Hyb | RS | Note |
| d    | S(1)  | -                                                           | C(17) | H(1)  | ----- | ----- | ----- | ----- | ----- | 1                  | 101 | 101 | 101.1 | 1.038           | 1.810 | 2   | 43  |     |    |      |
| d    | S(2)  | -                                                           | C(22) | H(2)  | ----- | ----- | ----- | ----- | ----- | 1                  | 101 | 101 | 101.0 | 1.087           | 1.810 | 2   | 43  |     |    |      |
| d    | O(1)  | -                                                           | C(1)  |       | ----- | ----- | ----- | ----- | ----- | 0                  | 0   | 0   | 0.0   | 1.217           | 1.217 | 1   | 35  | sp2 |    |      |
| d    | O(2)  | -                                                           | C(8)  |       | ----- | ----- | ----- | ----- | ----- | 0                  | 0   | 0   | 0.0   | 1.221           | 1.221 | 1   | 37  | sp2 |    |      |
| d    | O(3)  | -                                                           | C(15) |       | ----- | ----- | ----- | ----- | ----- | 0                  | 0   | 0   | 0.0   | 1.229           | 1.229 | 1   | 39  | sp2 |    |      |
| d    | O(4)  | -                                                           | C(18) |       | ----- | ----- | ----- | ----- | ----- | 0                  | 0   | 0   | 0.0   | 1.201           | 1.201 | 1   | 41  | sp2 |    |      |
| d    | O(5)  | -                                                           | C(18) | C(19) | ----- | ----- | ----- | ----- | ----- | 1                  | 116 | 116 | 115.7 | 1.324           | 1.446 | 2   | 42  | sp3 |    |      |
| d    | O(6)  | -                                                           | C(20) |       | ----- | ----- | ----- | ----- | ----- | 0                  | 0   | 0   | 0.0   | 1.228           | 1.228 | 1   | 39  | sp2 |    |      |
| d    | O(7)  | -                                                           | C(23) |       | ----- | ----- | ----- | ----- | ----- | 0                  | 0   | 0   | 0.0   | 1.209           | 1.209 | 1   | 41  | sp2 |    |      |
| d    | O(8)  | -                                                           | C(23) | C(24) | ----- | ----- | ----- | ----- | ----- | 1                  | 116 | 116 | 115.7 | 1.322           | 1.450 | 2   | 42  | sp3 |    |      |
| d    | N(1)  | -                                                           | C(15) | C(16) | H(3)  | ----- | ----- | ----- | ----- | 3                  | 119 | 122 | 120.0 | 0.880           | 1.463 | 3   | 33  | sp2 |    |      |
| d    | N(2)  | -                                                           | C(20) | C(21) | H(4)  | ----- | ----- | ----- | ----- | 3                  | 120 | 120 | 120.0 | 0.880           | 1.453 | 3   | 33  | sp2 |    |      |
| d    | C(1)  | -                                                           | O(1)  | C(2)  | C(14) | ----- | ----- | ----- | ----- | 3                  | 118 | 121 | 120.0 | 1.217           | 1.494 | 3   | 24  | sp2 |    |      |
| d    | C(2)  | -                                                           | C(1)  | C(3)  | C(7)  | ----- | ----- | ----- | ----- | 3                  | 118 | 121 | 120.0 | 1.393           | 1.494 | 3   | 18  | sp2 |    |      |
| d    | C(3)  | -                                                           | C(2)  | C(4)  | H(5)  | ----- | ----- | ----- | ----- | 3                  | 120 | 120 | 120.0 | 0.950           | 1.393 | 3   | 14  | sp2 |    |      |
| d    | C(4)  | -                                                           | C(3)  | C(5)  | H(6)  | ----- | ----- | ----- | ----- | 3                  | 119 | 120 | 120.0 | 0.950           | 1.386 | 3   | 12  | sp2 |    |      |
| d    | C(5)  | -                                                           | C(4)  | C(6)  | H(7)  | ----- | ----- | ----- | ----- | 3                  | 119 | 122 | 120.0 | 0.950           | 1.396 | 3   | 17  | sp2 |    |      |
| d    | C(6)  | -                                                           | C(5)  | C(7)  | C(15) | ----- | ----- | ----- | ----- | 3                  | 115 | 126 | 120.0 | 1.396           | 1.504 | 3   | 20  | sp2 |    |      |
| d    | C(7)  | -                                                           | C(2)  | C(6)  | C(8)  | ----- | ----- | ----- | ----- | 3                  | 119 | 121 | 119.9 | 1.401           | 1.500 | 3   | 19  | sp2 |    |      |
| d    | C(8)  | -                                                           | O(2)  | C(7)  | C(9)  | ----- | ----- | ----- | ----- | 3                  | 118 | 122 | 120.0 | 1.221           | 1.500 | 3   | 26  | sp2 |    |      |
| d    | C(9)  | -                                                           | C(8)  | C(10) | C(14) | ----- | ----- | ----- | ----- | 3                  | 119 | 121 | 120.0 | 1.401           | 1.492 | 3   | 19  | sp2 |    |      |
| d    | C(10) | -                                                           | C(9)  | C(11) | C(20) | ----- | ----- | ----- | ----- | 3                  | 117 | 123 | 119.9 | 1.395           | 1.511 | 3   | 20  | sp2 |    |      |
| d    | C(11) | -                                                           | C(10) | C(12) | H(8)  | ----- | ----- | ----- | ----- | 3                  | 120 | 121 | 120.0 | 0.950           | 1.395 | 3   | 17  | sp2 |    |      |
| d    | C(12) | -                                                           | C(11) | C(13) | H(9)  | ----- | ----- | ----- | ----- | 3                  | 120 | 120 | 120.0 | 0.950           | 1.390 | 3   | 12  | sp2 |    |      |
| d    | C(13) | -                                                           | C(12) | C(14) | H(10) | ----- | ----- | ----- | ----- | 3                  | 120 | 120 | 120.0 | 0.950           | 1.396 | 3   | 14  | sp2 |    |      |
| d    | C(14) | -                                                           | C(1)  | C(9)  | C(13) | ----- | ----- | ----- | ----- | 3                  | 119 | 121 | 120.0 | 1.396           | 1.488 | 3   | 18  | sp2 |    |      |
| d    | C(15) | -                                                           | O(3)  | N(1)  | C(6)  | ----- | ----- | ----- | ----- | 3                  | 116 | 123 | 119.9 | 1.229           | 1.504 | 3   | 28  | sp2 |    |      |
| d    | C(16) | -                                                           | N(1)  | C(17) | C(18) | H(11) | ----- | ----- | ----- | 6                  | 109 | 110 | 109.5 | 1.000           | 1.526 | 4   | 22  | sp3 | R  |      |
| d    | C(17) | -                                                           | S(1)  | C(16) | H(12) | H(13) | ----- | ----- | ----- | 6                  | 108 | 114 | 109.4 | 0.990           | 1.810 | 4   | 32  | sp3 |    |      |
| d    | C(18) | -                                                           | O(4)  | O(5)  | C(16) | ----- | ----- | ----- | ----- | 3                  | 111 | 125 | 120.0 | 1.201           | 1.526 | 3   | 31  | sp2 |    |      |
| d    | C(19) | -                                                           | O(5)  | H(14) | H(15) | H(16) | ----- | ----- | ----- | 6                  | 109 | 109 | 109.5 | 0.980           | 1.446 | 4   | 30  | sp3 |    |      |
| d    | C(20) | -                                                           | O(6)  | N(2)  | C(10) | ----- | ----- | ----- | ----- | 3                  | 116 | 124 | 120.0 | 1.228           | 1.511 | 3   | 28  | sp2 |    |      |
| d    | C(21) | -                                                           | N(2)  | C(22) | C(23) | H(17) | ----- | ----- | ----- | 6                  | 108 | 113 | 109.4 | 1.000           | 1.527 | 4   | 22  | sp3 | R  |      |
| d    | C(22) | -                                                           | S(2)  | C(21) | H(18) | H(19) | ----- | ----- | ----- | 6                  | 108 | 114 | 109.4 | 0.990           | 1.810 | 4   | 32  | sp3 |    |      |

|   |       |         |       |       |       |       |       |       |       |       |   |     |     |       |       |       |   |    |     |
|---|-------|---------|-------|-------|-------|-------|-------|-------|-------|-------|---|-----|-----|-------|-------|-------|---|----|-----|
| d | C(23) | - O(7)  | O(8)  | C(21) | ----- | ----- | ----- | ----- | ----- | ----- | 3 | 111 | 125 | 120.0 | 1.209 | 1.514 | 3 | 31 | sp2 |
| d | C(24) | - O(8)  | H(20) | H(21) | H(22) | ----- | ----- | ----- | ----- | ----- | 6 | 109 | 109 | 109.5 | 0.980 | 1.450 | 4 | 30 | sp3 |
|   |       |         |       |       |       |       |       |       |       |       |   |     |     |       |       |       |   |    |     |
| d | H(1)  | - S(1)  | ----- | ----- | ----- | ----- | ----- | ----- | ----- | ----- | 0 | 0   | 0   | 0.0   | 1.038 | 1.038 | 1 | 8  |     |
| d | H(2)  | - S(2)  | ----- | ----- | ----- | ----- | ----- | ----- | ----- | ----- | 0 | 0   | 0   | 0.0   | 1.087 | 1.087 | 1 | 8  |     |
| d | H(3)  | - N(1)  | ----- | ----- | ----- | ----- | ----- | ----- | ----- | ----- | 0 | 0   | 0   | 0.0   | 0.880 | 0.880 | 1 | 7  |     |
| d | H(4)  | - N(2)  | ----- | ----- | ----- | ----- | ----- | ----- | ----- | ----- | 0 | 0   | 0   | 0.0   | 0.880 | 0.880 | 1 | 7  |     |
| d | H(5)  | - C(3)  | ----- | ----- | ----- | ----- | ----- | ----- | ----- | ----- | 0 | 0   | 0   | 0.0   | 0.950 | 0.950 | 1 | 2  |     |
| d | H(6)  | - C(4)  | ----- | ----- | ----- | ----- | ----- | ----- | ----- | ----- | 0 | 0   | 0   | 0.0   | 0.950 | 0.950 | 1 | 1  |     |
| d | H(7)  | - C(5)  | ----- | ----- | ----- | ----- | ----- | ----- | ----- | ----- | 0 | 0   | 0   | 0.0   | 0.950 | 0.950 | 1 | 3  |     |
| d | H(8)  | - C(11) | ----- | ----- | ----- | ----- | ----- | ----- | ----- | ----- | 0 | 0   | 0   | 0.0   | 0.950 | 0.950 | 1 | 3  |     |
| d | H(9)  | - C(12) | ----- | ----- | ----- | ----- | ----- | ----- | ----- | ----- | 0 | 0   | 0   | 0.0   | 0.950 | 0.950 | 1 | 1  |     |
| d | H(10) | - C(13) | ----- | ----- | ----- | ----- | ----- | ----- | ----- | ----- | 0 | 0   | 0   | 0.0   | 0.950 | 0.950 | 1 | 2  |     |
| d | H(11) | - C(16) | ----- | ----- | ----- | ----- | ----- | ----- | ----- | ----- | 0 | 0   | 0   | 0.0   | 1.000 | 1.000 | 1 | 4  |     |
| d | H(12) | - C(17) | ----- | ----- | ----- | ----- | ----- | ----- | ----- | ----- | 0 | 0   | 0   | 0.0   | 0.990 | 0.990 | 1 | 6  |     |
| d | H(13) | - C(17) | ----- | ----- | ----- | ----- | ----- | ----- | ----- | ----- | 0 | 0   | 0   | 0.0   | 0.990 | 0.990 | 1 | 6  |     |
| d | H(14) | - C(19) | ----- | ----- | ----- | ----- | ----- | ----- | ----- | ----- | 0 | 0   | 0   | 0.0   | 0.980 | 0.980 | 1 | 5  |     |
| d | H(15) | - C(19) | ----- | ----- | ----- | ----- | ----- | ----- | ----- | ----- | 0 | 0   | 0   | 0.0   | 0.980 | 0.980 | 1 | 5  |     |
| d | H(16) | - C(19) | ----- | ----- | ----- | ----- | ----- | ----- | ----- | ----- | 0 | 0   | 0   | 0.0   | 0.980 | 0.980 | 1 | 5  |     |
| d | H(17) | - C(21) | ----- | ----- | ----- | ----- | ----- | ----- | ----- | ----- | 0 | 0   | 0   | 0.0   | 1.000 | 1.000 | 1 | 4  |     |
| d | H(18) | - C(22) | ----- | ----- | ----- | ----- | ----- | ----- | ----- | ----- | 0 | 0   | 0   | 0.0   | 0.990 | 0.990 | 1 | 6  |     |
| d | H(19) | - C(22) | ----- | ----- | ----- | ----- | ----- | ----- | ----- | ----- | 0 | 0   | 0   | 0.0   | 0.990 | 0.990 | 1 | 6  |     |
| d | H(20) | - C(24) | ----- | ----- | ----- | ----- | ----- | ----- | ----- | ----- | 0 | 0   | 0   | 0.0   | 0.980 | 0.980 | 1 | 5  |     |
| d | H(21) | - C(24) | ----- | ----- | ----- | ----- | ----- | ----- | ----- | ----- | 0 | 0   | 0   | 0.0   | 0.980 | 0.980 | 1 | 5  |     |
| d | H(22) | - C(24) | ----- | ----- | ----- | ----- | ----- | ----- | ----- | ----- | 0 | 0   | 0   | 0.0   | 0.980 | 0.980 | 1 | 5  |     |

=====

Analysis of the IntraMolecular Geometry in Terms of Unique Molecule(s)/Ions, with Bond Criterium:  $d(i-j) < R(i) + R(j) + Tol$

-----

-- Tol = 0.40 Ang. for Normal Bonds + 0.70 for (Earth)alkali-NonMetal Contacts and adjusted by -.40 Ang. for Metal-Metal Distances

-- The Bond Distance and Angle su's have been Incremented to Include the Effect of the Unit-cell su.

(Rel.Error in Dist. 0.0000 Ang. , Abs. Angle Error 0.000 Deg.)

-- Bonds below with '>' or '<' Substituted for '-' have Distances that Deviate from Expected Values(Based on the hybridisations).

-----

Bond Lengths (Angstrom). - (Bonds are ordered on the first label, left to right and top to bottom) - su in last digit in ().

=====

|               |            |               |          |               |          |               |          |
|---------------|------------|---------------|----------|---------------|----------|---------------|----------|
| S(1) - C(17)  | 1.8098(19) | S(2) - C(22)  | 1.810(2) | O(1) - C(1)   | 1.217(2) | O(2) - C(8)   | 1.221(2) |
| O(3) - C(15)  | 1.229(2)   | O(4) - C(18)  | 1.201(3) | O(5) - C(18)  | 1.324(2) | O(5) - C(19)  | 1.446(3) |
| O(6) - C(20)  | 1.228(2)   | O(7) - C(23)  | 1.209(2) | O(8) - C(23)  | 1.322(2) | O(8) - C(24)  | 1.450(3) |
| N(1) - C(15)  | 1.339(2)   | N(1) - C(16)  | 1.463(2) | N(2) - C(20)  | 1.346(2) | N(2) - C(21)  | 1.453(2) |
| C(1) > C(2)   | 1.494(3)   | C(1) > C(14)  | 1.488(3) | C(2) - C(3)   | 1.393(3) | C(2) - C(7)   | 1.401(3) |
| C(3) - C(4)   | 1.386(3)   | C(4) - C(5)   | 1.384(3) | C(5) - C(6)   | 1.396(3) | C(6) - C(7)   | 1.404(3) |
| C(6) > C(15)  | 1.504(3)   | C(7) > C(8)   | 1.500(2) | C(8) > C(9)   | 1.492(3) | C(9) - C(10)  | 1.401(2) |
| C(9) - C(14)  | 1.403(2)   | C(10) - C(11) | 1.395(3) | C(10) > C(20) | 1.511(3) | C(11) - C(12) | 1.390(3) |
| C(12) - C(13) | 1.380(3)   | C(13) - C(14) | 1.396(3) | C(16) - C(17) | 1.524(3) | C(16) - C(18) | 1.526(3) |
| C(21) - C(22) | 1.527(2)   | C(21) - C(23) | 1.514(3) |               |          |               |          |

|               |      |               |      |               |      |               |      |
|---------------|------|---------------|------|---------------|------|---------------|------|
| S(1) - H(1)   | 1.04 | S(2) - H(2)   | 1.09 | N(1) - H(3)   | 0.88 | N(2) - H(4)   | 0.88 |
| C(3) - H(5)   | 0.95 | C(4) - H(6)   | 0.95 | C(5) - H(7)   | 0.95 | C(11) - H(8)  | 0.95 |
| C(12) - H(9)  | 0.95 | C(13) - H(10) | 0.95 | C(16) - H(11) | 1.00 | C(17) - H(12) | 0.99 |
| C(17) - H(13) | 0.99 | C(19) - H(14) | 0.98 | C(19) - H(15) | 0.98 | C(19) - H(16) | 0.98 |
| C(21) - H(17) | 1.00 | C(22) - H(18) | 0.99 | C(22) - H(19) | 0.99 | C(24) - H(20) | 0.98 |
| C(24) - H(21) | 0.98 | C(24) - H(22) | 0.98 |               |      |               |      |

Bond/Valence Angles (Degrees) - (Angles are ordered on the middle label, left to right and top to bottom) - su in last digit in ().

=====

|                       |            |                       |            |                       |            |
|-----------------------|------------|-----------------------|------------|-----------------------|------------|
| C(18) - O(5) - C(19)  | 115.67(17) | C(23) - O(8) - C(24)  | 115.67(16) | C(15) - N(1) - C(16)  | 121.67(16) |
| C(20) - N(2) - C(21)  | 120.32(15) | O(1) - C(1) - C(2)    | 120.49(18) | O(1) - C(1) - C(14)   | 121.44(18) |
| C(2) - C(1) - C(14)   | 118.07(15) | C(1) - C(2) - C(3)    | 118.43(16) | C(1) - C(2) - C(7)    | 120.84(16) |
| C(3) - C(2) - C(7)    | 120.73(17) | C(2) - C(3) - C(4)    | 120.04(18) | C(3) - C(4) - C(5)    | 119.45(19) |
| C(4) - C(5) - C(6)    | 121.52(18) | C(5) - C(6) - C(7)    | 119.07(17) | C(5) - C(6) - C(15)   | 115.26(16) |
| C(7) - C(6) - C(15)   | 125.67(16) | C(2) - C(7) - C(6)    | 119.07(16) | C(2) - C(7) - C(8)    | 120.04(16) |
| C(6) - C(7) - C(8)    | 120.58(16) | O(2) - C(8) - C(7)    | 120.44(17) | O(2) - C(8) - C(9)    | 121.65(16) |
| C(7) - C(8) - C(9)    | 117.89(14) | C(8) - C(9) - C(10)   | 120.08(15) | C(8) - C(9) - C(14)   | 120.62(16) |
| C(10) - C(9) - C(14)  | 119.30(17) | C(9) - C(10) - C(11)  | 119.42(16) | C(9) - C(10) - C(20)  | 122.98(17) |
| C(11) - C(10) - C(20) | 117.43(16) | C(10) - C(11) - C(12) | 120.59(17) | C(11) - C(12) - C(13) | 120.21(18) |
| C(12) - C(13) - C(14) | 119.85(17) | C(1) - C(14) - C(9)   | 120.72(17) | C(1) - C(14) - C(13)  | 118.84(16) |
| C(9) - C(14) - C(13)  | 120.39(17) | O(3) - C(15) - N(1)   | 123.37(17) | O(3) - C(15) - C(6)   | 119.81(17) |
| N(1) - C(15) - C(6)   | 116.49(17) | N(1) - C(16) - C(17)  | 108.89(15) | N(1) - C(16) - C(18)  | 109.65(14) |
| C(17) - C(16) - C(18) | 109.82(15) | S(1) - C(17) - C(16)  | 114.02(13) | O(4) - C(18) - O(5)   | 124.98(18) |
| O(4) - C(18) - C(16)  | 124.08(18) | O(5) - C(18) - C(16)  | 110.93(16) | O(6) - C(20) - N(2)   | 123.63(16) |
| O(6) - C(20) - C(10)  | 120.28(16) | N(2) - C(20) - C(10)  | 116.00(16) | N(2) - C(21) - C(22)  | 113.14(15) |
| N(2) - C(21) - C(23)  | 108.67(15) | C(22) - C(21) - C(23) | 111.03(15) | S(2) - C(22) - C(21)  | 114.25(14) |
| O(7) - C(23) - O(8)   | 125.02(17) | O(7) - C(23) - C(21)  | 124.31(16) | O(8) - C(23) - C(21)  | 110.66(15) |

|                       |     |                       |     |                       |     |
|-----------------------|-----|-----------------------|-----|-----------------------|-----|
| C(17) - S(1) - H(1)   | 101 | C(22) - S(2) - H(2)   | 101 | C(15) - N(1) - H(3)   | 119 |
| C(16) - N(1) - H(3)   | 119 | C(20) - N(2) - H(4)   | 120 | C(21) - N(2) - H(4)   | 120 |
| C(2) - C(3) - H(5)    | 120 | C(4) - C(3) - H(5)    | 120 | C(3) - C(4) - H(6)    | 120 |
| C(5) - C(4) - H(6)    | 120 | C(4) - C(5) - H(7)    | 119 | C(6) - C(5) - H(7)    | 119 |
| C(10) - C(11) - H(8)  | 120 | C(12) - C(11) - H(8)  | 120 | C(11) - C(12) - H(9)  | 120 |
| C(13) - C(12) - H(9)  | 120 | C(12) - C(13) - H(10) | 120 | C(14) - C(13) - H(10) | 120 |
| N(1) - C(16) - H(11)  | 109 | C(17) - C(16) - H(11) | 109 | C(18) - C(16) - H(11) | 109 |
| S(1) - C(17) - H(12)  | 109 | S(1) - C(17) - H(13)  | 109 | C(16) - C(17) - H(12) | 109 |
| C(16) - C(17) - H(13) | 109 | H(12) - C(17) - H(13) | 108 | O(5) - C(19) - H(14)  | 109 |
| O(5) - C(19) - H(15)  | 109 | O(5) - C(19) - H(16)  | 109 | H(14) - C(19) - H(15) | 109 |
| H(14) - C(19) - H(16) | 109 | H(15) - C(19) - H(16) | 109 | N(2) - C(21) - H(17)  | 108 |
| C(22) - C(21) - H(17) | 108 | C(23) - C(21) - H(17) | 108 | S(2) - C(22) - H(18)  | 109 |
| S(2) - C(22) - H(19)  | 109 | C(21) - C(22) - H(18) | 109 | C(21) - C(22) - H(19) | 109 |
| H(18) - C(22) - H(19) | 108 | O(8) - C(24) - H(20)  | 109 | O(8) - C(24) - H(21)  | 109 |
| O(8) - C(24) - H(22)  | 109 | H(20) - C(24) - H(21) | 109 | H(20) - C(24) - H(22) | 109 |
| H(21) - C(24) - H(22) | 109 |                       |     |                       |     |

Torsion/Dihedral Angles (Deg.) - Klyne & Prelog Convention (Dunitz, p241) - (Excl. Minor Disorder & Embedded Bond Angl. > 160. Deg.)

|                         |             |                         |             |                        |             |
|-------------------------|-------------|-------------------------|-------------|------------------------|-------------|
| C(19) O(5) C(18) O(4)   | -2.8(3)     | C(19) O(5) C(18) C(16)  | 176.23(17)  | C(24) O(8) C(23) O(7)  | -2.8(3)     |
| C(24) O(8) C(23) C(21)  | 176.02(16)  | C(16) N(1) C(15) O(3)   | 6.6(3)      | C(16) N(1) C(15) C(6)  | 179.86(15)  |
| C(15) N(1) C(16) C(17)  | 144.75(16)  | C(15) N(1) C(16) C(18)  | -95.1(2)    | C(21) N(2) C(20) O(6)  | -7.6(3)     |
| C(21) N(2) C(20) C(10)  | 175.97(15)  | C(20) N(2) C(21) C(22)  | 67.0(2)     | C(20) N(2) C(21) C(23) | -169.23(16) |
| O(1) C(1) C(2) C(3)     | -4.6(3)     | O(1) C(1) C(2) C(7)     | 175.51(19)  | C(14) C(1) C(2) C(3)   | 176.33(17)  |
| C(14) C(1) C(2) C(7)    | -3.6(3)     | O(1) C(1) C(14) C(9)    | -168.63(19) | O(1) C(1) C(14) C(13)  | 8.6(3)      |
| C(2) C(1) C(14) C(9)    | 10.4(3)     | C(2) C(1) C(14) C(13)   | -172.31(17) | C(1) C(2) C(3) C(4)    | 179.30(19)  |
| C(7) C(2) C(3) C(4)     | -0.8(3)     | C(1) C(2) C(7) C(6)     | 177.63(17)  | C(1) C(2) C(7) C(8)    | -8.8(3)     |
| C(3) C(2) C(7) C(6)     | -2.3(3)     | C(3) C(2) C(7) C(8)     | 171.36(18)  | C(2) C(3) C(4) C(5)    | 2.2(3)      |
| C(3) C(4) C(5) C(6)     | -0.5(3)     | C(4) C(5) C(6) C(7)     | -2.6(3)     | C(4) C(5) C(6) C(15)   | 177.53(18)  |
| C(5) C(6) C(7) C(2)     | 3.9(3)      | C(5) C(6) C(7) C(8)     | -169.67(17) | C(15) C(6) C(7) C(2)   | -176.25(18) |
| C(15) C(6) C(7) C(8)    | 10.2(3)     | C(5) C(6) C(15) O(3)    | 54.6(2)     | C(5) C(6) C(15) N(1)   | -118.94(19) |
| C(7) C(6) C(15) O(3)    | -125.3(2)   | C(7) C(6) C(15) N(1)    | 61.2(2)     | C(2) C(7) C(8) O(2)    | -163.79(18) |
| C(2) C(7) C(8) C(9)     | 14.4(3)     | C(6) C(7) C(8) O(2)     | 9.7(3)      | C(6) C(7) C(8) C(9)    | -172.07(17) |
| O(2) C(8) C(9) C(10)    | -8.6(3)     | O(2) C(8) C(9) C(14)    | 170.55(18)  | C(7) C(8) C(9) C(10)   | 173.18(17)  |
| C(7) C(8) C(9) C(14)    | -7.6(3)     | C(8) C(9) C(10) C(11)   | -175.18(17) | C(8) C(9) C(10) C(20)  | 9.7(3)      |
| C(14) C(9) C(10) C(11)  | 5.6(3)      | C(14) C(9) C(10) C(20)  | -169.47(17) | C(8) C(9) C(14) C(1)   | -4.6(3)     |
| C(8) C(9) C(14) C(13)   | 178.14(17)  | C(10) C(9) C(14) C(1)   | 174.56(17)  | C(10) C(9) C(14) C(13) | -2.7(3)     |
| C(9) C(10) C(11) C(12)  | -4.3(3)     | C(20) C(10) C(11) C(12) | 171.03(17)  | C(9) C(10) C(20) O(6)  | 81.7(2)     |
| C(9) C(10) C(20) N(2)   | -101.8(2)   | C(11) C(10) C(20) O(6)  | -93.5(2)    | C(11) C(10) C(20) N(2) | 83.0(2)     |
| C(10) C(11) C(12) C(13) | 0.0(3)      | C(11) C(12) C(13) C(14) | 3.0(3)      | C(12) C(13) C(14) C(1) | -178.96(18) |
| C(12) C(13) C(14) C(9)  | -1.7(3)     | N(1) C(16) C(17) S(1)   | 172.76(12)  | C(18) C(16) C(17) S(1) | 52.68(18)   |
| N(1) C(16) C(18) O(4)   | -51.3(3)    | N(1) C(16) C(18) O(5)   | 129.67(16)  | C(17) C(16) C(18) O(4) | 68.3(2)     |
| C(17) C(16) C(18) O(5)  | -110.71(18) | N(2) C(21) C(22) S(2)   | 69.97(19)   | C(23) C(21) C(22) S(2) | -52.52(19)  |
| N(2) C(21) C(23) O(7)   | 0.3(3)      | N(2) C(21) C(23) O(8)   | -178.50(15) | C(22) C(21) C(23) O(7) | 125.4(2)    |
| C(22) C(21) C(23) O(8)  | -53.5(2)    |                         |             |                        |             |
| H(1) S(1) C(17) C(16)   | 68          | H(1) S(1) C(17) H(12)   | -171        | H(1) S(1) C(17) H(13)  | -54         |

|       |       |       |       |      |       |       |       |       |      |       |       |       |       |      |
|-------|-------|-------|-------|------|-------|-------|-------|-------|------|-------|-------|-------|-------|------|
| H(2)  | S(2)  | C(22) | C(21) | -65  | H(2)  | S(2)  | C(22) | H(18) | 57   | H(2)  | S(2)  | C(22) | H(19) | 174  |
| C(18) | O(5)  | C(19) | H(14) | -72  | C(18) | O(5)  | C(19) | H(15) | 168  | C(18) | O(5)  | C(19) | H(16) | 48   |
| C(23) | O(8)  | C(24) | H(20) | 76   | C(23) | O(8)  | C(24) | H(21) | -44  | C(23) | O(8)  | C(24) | H(22) | -164 |
| H(3)  | N(1)  | C(15) | O(3)  | -173 | H(3)  | N(1)  | C(15) | C(6)  | 0    | C(15) | N(1)  | C(16) | H(11) | 25   |
| H(3)  | N(1)  | C(16) | C(17) | -35  | H(3)  | N(1)  | C(16) | C(18) | 85   | H(3)  | N(1)  | C(16) | H(11) | -155 |
| H(4)  | N(2)  | C(20) | O(6)  | 172  | H(4)  | N(2)  | C(20) | C(10) | -4   | C(20) | N(2)  | C(21) | H(17) | -52  |
| H(4)  | N(2)  | C(21) | C(22) | -113 | H(4)  | N(2)  | C(21) | C(23) | 11   | H(4)  | N(2)  | C(21) | H(17) | 128  |
| C(1)  | C(2)  | C(3)  | H(5)  | -1   | C(7)  | C(2)  | C(3)  | H(5)  | 179  | C(2)  | C(3)  | C(4)  | H(6)  | -178 |
| H(5)  | C(3)  | C(4)  | C(5)  | -178 | H(5)  | C(3)  | C(4)  | H(6)  | 2    | C(3)  | C(4)  | C(5)  | H(7)  | 180  |
| H(6)  | C(4)  | C(5)  | C(6)  | 180  | H(6)  | C(4)  | C(5)  | H(7)  | 0    | H(7)  | C(5)  | C(6)  | C(7)  | 177  |
| H(7)  | C(5)  | C(6)  | C(15) | -2   | C(9)  | C(10) | C(11) | H(8)  | 176  | C(20) | C(10) | C(11) | H(8)  | -9   |
| C(10) | C(11) | C(12) | H(9)  | -180 | H(8)  | C(11) | C(12) | C(13) | 180  | H(8)  | C(11) | C(12) | H(9)  | 0    |
| C(11) | C(12) | C(13) | H(10) | -177 | H(9)  | C(12) | C(13) | C(14) | -177 | H(9)  | C(12) | C(13) | H(10) | 3    |
| H(10) | C(13) | C(14) | C(1)  | 1    | H(10) | C(13) | C(14) | C(9)  | 178  | N(1)  | C(16) | C(17) | H(12) | 51   |
| N(1)  | C(16) | C(17) | H(13) | -66  | C(18) | C(16) | C(17) | H(12) | -69  | C(18) | C(16) | C(17) | H(13) | 174  |
| H(11) | C(16) | C(17) | S(1)  | -68  | H(11) | C(16) | C(17) | H(12) | 171  | H(11) | C(16) | C(17) | H(13) | 54   |
| H(11) | C(16) | C(18) | O(4)  | -171 | H(11) | C(16) | C(18) | O(5)  | 10   | N(2)  | C(21) | C(22) | H(18) | -52  |
| N(2)  | C(21) | C(22) | H(19) | -168 | C(23) | C(21) | C(22) | H(18) | -174 | C(23) | C(21) | C(22) | H(19) | 69   |
| H(17) | C(21) | C(22) | S(2)  | -171 | H(17) | C(21) | C(22) | H(18) | 68   | H(17) | C(21) | C(22) | H(19) | -49  |
| H(17) | C(21) | C(23) | O(7)  | -117 | H(17) | C(21) | C(23) | O(8)  | 65   |       |       |       |       |      |

Statistics of Bond Length per Bond Type (NOTE: A Indicates 10 Occurrences, B Indicates 11, Etc. and \* more than 35)

[illegible]



Selected Bond Lengths (Angstrom) – see M.F.C. Ladd & R.A. Palmer, Structure Determination by X-Ray Crystallography (1985)

Formal single bonds

|            |            |            |            |            |            |            |            |            |            |
|------------|------------|------------|------------|------------|------------|------------|------------|------------|------------|
| C4-C4 1.54 | C4-C3 1.52 | C4-C2 1.46 | C4-N3 1.47 | C4-N2 1.47 | C4-O2 1.43 | C3-C3 1.46 | C3-C2 1.45 | C3-N3 1.40 | C3-N2 1.40 |
| C3-O2 1.36 | C2-C2 1.38 | C2-N3 1.33 | C2-N2 1.33 | C2-O2 1.36 | N3-N3 1.45 | N3-N2 1.45 | N3-O2 1.36 | N2-N2 1.45 | N2-O2 1.41 |

Formal double bonds

|            |            |            |            |            |            |            |            |            |            |
|------------|------------|------------|------------|------------|------------|------------|------------|------------|------------|
| C3-C3 1.34 | C3-C2 1.31 | C3-N2 1.32 | C3-O1 1.22 | C2-C2 1.28 | C2-N2 1.32 | C2-O1 1.16 | N3-O1 1.24 | N2-N2 1.25 | N2-O1 1.21 |
|------------|------------|------------|------------|------------|------------|------------|------------|------------|------------|

Formal triple bonds

Aromatic bonds

|            |            |            |            |            |
|------------|------------|------------|------------|------------|
| C2-C2 1.20 | C2-N1 1.16 | C3-C3 1.40 | C2-N2 1.34 | N2-N2 1.35 |
|------------|------------|------------|------------|------------|

The notation in the table indicates the connectivity of the atoms

For more detailed standard bond distance tabulations see: J. Chem. Soc. Perkin II, (1987), S1-S19;  
J. Chem. Soc. Dalton Trans. (1989), S1 – S83 or International Tables C, (1992), 707-791.

Automatic Search for Rings (3 to 24-Membered) and Planes Determined by 4 or More Connected Atoms (with Deviation < 0.10 Ang.)

Least-Squares Planes -  $P \cdot X + Q \cdot Y + R \cdot Z = S$  :: First Line Orthogonal (X0,Y0,Z0), Second Line Fractional (X,Y,Z)

=====  
Ring/Plan/Resd/Lspl N Indicates that the Ring/Plane/Residue Involves N Atoms

Sigref - R.M.S-Error of the Contributing Atoms

The Deviation D of an Atom with Sigpln -  $\text{Sqrt}(\text{Sum}(j=1:N) (D(j)**2)/(N-3))$

Chisq - Chi-Squared =  $\text{Sum}(j=1:N) (D(j)**2)/\text{Sigref}**2$

Fractional Coordinates X,Y,Z may be Pl.Hyp. - Result of the Chi.Sq. Test for Planarity (See Stout & Jensen, p424)

Calculated via Substitution in

\*\*\*\* - Atoms Deviating by More Than 1.5 Angstrom and Hydrogen Atoms are NOT Listed

D =  $P \cdot X + Q \cdot Y + R \cdot Z - S$  (2nd Line)

Note - Weights : UNIT

- Deviations from planes are in Angstrom Units

- The Plane determining Atoms have been Marked #

- DISTANCES TO PLANES ROUNDED TO 3 DECIMALS !! (Use Graphical Interface for more)

| Nr   | 1 | P         | Q          | R           | S         | Sigref | 0.002     | Sigpln | 0.081     | Chisq  | 5996.7    | Pl.Hyp. | P<5       |
|------|---|-----------|------------|-------------|-----------|--------|-----------|--------|-----------|--------|-----------|---------|-----------|
| Ring |   | 0.7165(5) | 0.5631(6)  | -0.4117(7)  | 2.703(11) | #C(1)  | 0.062(2)  | #C(2)  | 0.009(2)  | #C(7)  | -0.078(2) | #C(8)   | 0.077(2)  |
| A 6  |   | 3.593(3)  | 10.523(11) | -10.473(18) | 2.703(11) | #C(9)  | -0.007(2) | #C(14) | -0.063(2) | S(2)   | -0.794(1) | O(1)    | 0.220(2)  |
|      |   |           |            |             |           | O(2)   | 0.297(1)  | O(3)   | 0.434(2)  | O(6)   | 1.436(1)  | N(1)    | -1.472(2) |
|      |   |           |            |             |           | N(2)   | -0.795(2) | C(3)   | 0.047(2)  | C(4)   | 0.015(2)  | C(5)    | -0.100(2) |
|      |   |           |            |             |           | C(6)   | -0.176(2) | C(10)  | -0.012(2) | C(11)  | -0.192(2) | C(12)   | -0.275(2) |
|      |   |           |            |             |           | C(13)  | -0.180(2) | C(15)  | -0.357(2) | C(20)  | 0.277(2)  | C(21)   | -0.634(2) |
|      |   |           |            |             |           | C(22)  | 0.124(2)  |        |           |        |           |         |           |
| Nr   | 2 | P         | Q          | R           | S         | Sigref | 0.002     | Sigpln | 0.019     | Chisq  | 302.0     | Pl.Hyp. | P<5       |
| Ring |   | 0.7363(6) | 0.5851(7)  | -0.3399(8)  | 3.728(11) | #C(2)  | -0.002(2) | #C(3)  | -0.014(2) | #C(4)  | 0.013(2)  | #C(5)   | 0.005(2)  |
| A 6  |   | 3.693(3)  | 10.933(13) | -8.645(19)  | 3.728(11) | #C(6)  | -0.020(2) | #C(7)  | 0.019(2)  | S(2)   | -0.363(1) | O(1)    | 0.049(2)  |
|      |   |           |            |             |           | O(2)   | 0.539(1)  | O(3)   | 0.757(2)  | O(8)   | -1.327(1) | N(1)    | -1.158(2) |
|      |   |           |            |             |           | N(2)   | -0.486(2) | C(1)   | -0.015(2) | C(8)   | 0.226(2)  | C(9)    | 0.078(2)  |
|      |   |           |            |             |           | C(10)  | 0.120(2)  | C(11)  | -0.121(2) | C(12)  | -0.312(2) | C(13)   | -0.264(2) |
|      |   |           |            |             |           | C(14)  | -0.087(2) | C(15)  | -0.085(2) | C(16)  | -1.337(2) | C(20)   | 0.521(2)  |
|      |   |           |            |             |           | C(21)  | -0.214(2) | C(22)  | 0.573(2)  |        |           |         |           |
| Nr   | 3 | P         | Q          | R           | S         | Sigref | 0.002     | Sigpln | 0.028     | Chisq  | 676.6     | Pl.Hyp. | P<5       |
| Ring |   | 0.6457(6) | 0.6009(6)  | -0.4711(7)  | 2.200(12) | #C(9)  | -0.025(2) | #C(10) | 0.031(2)  | #C(11) | -0.011(2) | #C(12)  | -0.016(2) |
| A 6  |   | 3.238(3)  | 11.230(12) | -11.982(17) | 2.200(12) | #C(13) | 0.021(2)  | #C(14) | -0.001(2) | S(2)   | -0.728(1) | O(1)    | 0.289(2)  |
|      |   |           |            |             |           | O(2)   | 0.059(1)  | O(3)   | -0.126(2) | O(6)   | 1.374(1)  | N(2)    | -0.857(2) |
|      |   |           |            |             |           | C(1)   | 0.063(2)  | C(2)   | -0.137(2) | C(3)   | -0.157(2) | C(4)    | -0.326(2) |
|      |   |           |            |             |           | C(5)   | -0.520(2) | C(6)   | -0.541(2) | C(7)   | -0.305(2) | C(8)    | -0.090(2) |
|      |   |           |            |             |           | C(15)  | -0.820(2) | C(20)  | 0.243(2)  | C(21)  | -0.777(2) | C(22)   | 0.050(2)  |
| Nr   | 4 | P         | Q          | R           | S         | Sigref | 0.002     | Sigpln | 0.076     | Chisq  | 11352.5   | Pl.Hyp. | P<5       |
| Ring |   | 0.7327(3) | 0.5659(3)  | -0.3781(5)  | 3.153(8)  | #C(1)  | 0.017(2)  | #C(2)  | 0.007(2)  | #C(3)  | 0.035(2)  | #C(4)   | 0.041(2)  |

|      |              |             |              |            |        |             |         |             |        |             |        |             |
|------|--------------|-------------|--------------|------------|--------|-------------|---------|-------------|--------|-------------|--------|-------------|
| A 10 | 3. 6741 (13) | 10. 575 (6) | -9. 618 (14) | 3. 153 (8) | #C (5) | -0. 025 (2) | #C (6)  | -0. 090 (2) | #C (7) | -0. 031 (2) | #C (8) | 0. 135 (2)  |
|      |              |             |              |            | #C (9) | 0. 009 (2)  | #C (14) | -0. 097 (2) | S (2)  | -0. 665 (1) | O (1)  | 0. 132 (2)  |
|      |              |             |              |            | O (2)  | 0. 397 (1)  | O (3)   | 0. 605 (2)  | N (1)  | -1. 318 (2) | N (2)  | -0. 693 (1) |
|      |              |             |              |            | C (10) | 0. 013 (2)  | C (11)  | -0. 207 (2) | C (12) | -0. 339 (2) | C (13) | -0. 253 (2) |
|      |              |             |              |            | C (15) | -0. 216 (2) | C (20)  | 0. 352 (2)  | C (21) | -0. 482 (2) | C (22) | 0. 278 (2)  |

|      |              |             |               |            |         |             |         |             |         |             |          |             |
|------|--------------|-------------|---------------|------------|---------|-------------|---------|-------------|---------|-------------|----------|-------------|
| Nr 5 | P            | Q           | R             | S          | Sigref  | 0. 002      | Sigpln  | 0. 086      | Chisq   | 15051. 6    | Pl. Hyp. | P<5         |
| Ring | 0. 6799 (3)  | 0. 5862 (3) | -0. 4407 (5)  | 2. 440 (8) | #C (1)  | 0. 112 (2)  | #C (2)  | -0. 019 (2) | #C (7)  | -0. 144 (2) | #C (8)   | 0. 048 (2)  |
| A 10 | 3. 4093 (14) | 10. 954 (6) | -11. 209 (13) | 2. 440 (8) | #C (9)  | 0. 042 (2)  | #C (10) | 0. 073 (2)  | #C (11) | -0. 034 (2) | #C (12)  | -0. 081 (2) |
|      |              |             |               |            | #C (13) | -0. 021 (2) | #C (14) | 0. 023 (2)  | S (2)   | -0. 679 (1) | O (1)    | 0. 301 (2)  |
|      |              |             |               |            | O (2)   | 0. 235 (1)  | O (3)   | 0. 199 (2)  | O (6)   | 1. 474 (1)  | N (2)    | -0. 758 (2) |
|      |              |             |               |            | C (3)   | -0. 015 (2) | C (4)   | -0. 119 (2) | C (5)   | -0. 272 (2) | C (6)    | -0. 314 (2) |
|      |              |             |               |            | C (15)  | -0. 542 (2) | C (20)  | 0. 327 (2)  | C (21)  | -0. 634 (2) | C (22)   | 0. 165 (2)  |

|      |             |             |               |            |         |             |         |             |         |             |          |             |
|------|-------------|-------------|---------------|------------|---------|-------------|---------|-------------|---------|-------------|----------|-------------|
| Nr 6 | P           | Q           | R             | S          | Sigref  | 0. 002      | Sigpln  | 0. 107      | Chisq   | 35023. 9    | Pl. Hyp. | P<5         |
| Ring | 0. 7059 (2) | 0. 5785 (2) | -0. 4088 (4)  | 2. 768 (7) | #C (1)  | 0. 116 (2)  | #C (2)  | 0. 045 (2)  | #C (3)  | 0. 057 (2)  | #C (4)   | 0. 007 (2)  |
| A 14 | 3. 5398 (9) | 10. 810 (4) | -10. 399 (11) | 2. 768 (7) | #C (5)  | -0. 101 (2) | #C (6)  | -0. 151 (2) | #C (7)  | -0. 035 (2) | #C (8)   | 0. 147 (2)  |
|      |             |             |               |            | #C (9)  | 0. 083 (2)  | #C (10) | 0. 104 (2)  | #C (11) | -0. 059 (2) | #C (12)  | -0. 150 (2) |
|      |             |             |               |            | #C (13) | -0. 080 (2) | #C (14) | 0. 019 (2)  | S (2)   | -0. 601 (1) | O (1)    | 0. 267 (2)  |
|      |             |             |               |            | O (2)   | 0. 374 (1)  | O (3)   | 0. 454 (2)  | N (1)   | -1. 430 (2) | N (2)    | -0. 662 (2) |
|      |             |             |               |            | C (15)  | -0. 327 (2) | C (20)  | 0. 402 (2)  | C (21)  | -0. 492 (2) | C (22)   | 0. 290 (2)  |

|      |             |               |              |              |         |             |         |             |         |             |          |             |
|------|-------------|---------------|--------------|--------------|---------|-------------|---------|-------------|---------|-------------|----------|-------------|
| Nr 7 | P           | Q             | R            | S            | Sigref  | 0. 002      | Sigpln  | 0. 847      | Chisq   | 999999. 9   | Pl. Hyp. |             |
| Resd | 0. 8287 (1) | 0. 5544 (1)   | -0. 0774 (1) | 6. 8520 (19) | #S (1)  | -0. 582 (1) | #S (2)  | 0. 267 (1)  | #O (1)  | -0. 757 (2) | #O (2)   | 1. 057 (1)  |
| A 36 | 4. 1556 (3) | 10. 3594 (19) | -1. 969 (3)  | 6. 8520 (19) | #O (3)  | 1. 855 (2)  | #O (4)  | -1. 644 (2) | #O (5)  | 0. 349 (2)  | #O (6)   | 2. 005 (1)  |
|      |             |               |              |              | #O (7)  | -1. 582 (1) | #O (8)  | 0. 095 (1)  | #N (1)  | -0. 111 (2) | #N (2)   | 0. 026 (2)  |
|      |             |               |              |              | #C (1)  | -0. 512 (2) | #C (2)  | -0. 160 (2) | #C (3)  | -0. 214 (2) | #C (4)   | 0. 120 (2)  |
|      |             |               |              |              | #C (5)  | 0. 463 (2)  | #C (6)  | 0. 489 (2)  | #C (7)  | 0. 214 (2)  | #C (8)   | 0. 456 (2)  |
|      |             |               |              |              | #C (9)  | -0. 023 (2) | #C (10) | 0. 049 (2)  | #C (11) | -0. 494 (2) | #C (12)  | -1. 022 (2) |
|      |             |               |              |              | #C (13) | -1. 014 (2) | #C (14) | -0. 532 (2) | #C (15) | 0. 824 (2)  | #C (16)  | 0. 095 (2)  |
|      |             |               |              |              | #C (17) | -0. 572 (2) | #C (18) | -0. 518 (2) | #C (19) | -0. 154 (3) | #C (20)  | 0. 788 (2)  |
|      |             |               |              |              | #C (21) | 0. 643 (2)  | #C (22) | 1. 366 (2)  | #C (23) | -0. 420 (2) | #C (24)  | -0. 849 (3) |

|      |             |              |               |               |         |             |        |            |         |             |          |             |
|------|-------------|--------------|---------------|---------------|---------|-------------|--------|------------|---------|-------------|----------|-------------|
| Nr 8 | P           | Q            | R             | S             | Sigref  | 0. 002      | Sigpln | 0. 032     | Chisq   | 548. 6      | Pl. Hyp. | P<5         |
| Plan | 0. 5602 (8) | -0. 3550 (9) | -0. 7484 (5)  | -12. 329 (14) | #O (4)  | 0. 003 (2)  | #O (5) | 0. 030 (2) | #C (16) | -0. 020 (2) | #C (18)  | 0. 012 (2)  |
| A 5  | 2. 809 (4)  | -6. 634 (17) | -19. 037 (14) | -12. 329 (14) | #C (19) | -0. 025 (3) | O (2)  | 1. 241 (1) | O (6)   | -0. 027 (1) | N (1)    | 1. 024 (2)  |
|      |             |              |               |               | C (10)  | 0. 565 (2)  | C (11) | 0. 307 (2) | C (12)  | 1. 199 (2)  | C (17)   | -1. 375 (2) |
|      |             |              |               |               | C (20)  | -0. 338 (2) |        |            |         |             |          |             |

|      |              |              |              |             |         |             |         |             |        |             |          |             |
|------|--------------|--------------|--------------|-------------|---------|-------------|---------|-------------|--------|-------------|----------|-------------|
| Nr 9 | P            | Q            | R            | S           | Sigref  | 0. 002      | Sigpln  | 0. 040      | Chisq  | 1538. 8     | Pl. Hyp. | P<5         |
| Plan | -0. 7111 (6) | 0. 6914 (7)  | -0. 1273 (5) | 4. 664 (13) | #O (7)  | -0. 019 (1) | #O (8)  | -0. 027 (1) | #N (2) | 0. 033 (2)  | #C (21)  | -0. 004 (2) |
| A 6  | -3. 566 (3)  | 12. 921 (12) | -3. 238 (14) | 4. 664 (13) | #C (23) | -0. 026 (2) | #C (24) | 0. 044 (3)  | O (6)  | -0. 239 (1) | C (9)    | -1. 386 (2) |
|      |              |              |              |             | C (10)  | -0. 195 (2) | C (11)  | 1. 027 (2)  | C (12) | 1. 073 (2)  | C (13)   | -0. 094 (2) |

|                                                |            |            |             |           |        |           |        |           |        |           |         |           |
|------------------------------------------------|------------|------------|-------------|-----------|--------|-----------|--------|-----------|--------|-----------|---------|-----------|
| C(14) -1.327(2) C(20) -0.160(2) C(22) 1.152(2) |            |            |             |           |        |           |        |           |        |           |         |           |
| Nr 10                                          | P          | Q          | R           | S         | Sigref | 0.002     | Sigpln | 0.014     | Chisq  | 67.3      | Pl.Hyp. | P<5       |
| Plan                                           | -0.185(2)  | 0.9708(5)  | -0.1537(7)  | 3.93(2)   | #N(1)  | 0.001(1)  | #C(6)  | -0.001(2) | #C(15) | 0.001(2)  | #C(16)  | -0.001(2) |
| A 4                                            | -0.925(12) | 18.141(10) | -3.909(18)  | 3.93(2)   | S(1)   | 0.756(1)  | 0(3)   | -0.120(2) | C(2)   | 0.818(2)  | C(3)    | -0.311(2) |
|                                                |            |            |             |           | C(4)   | -1.265(2) | C(5)   | -1.106(2) | C(7)   | 0.998(2)  | C(17)   | 0.832(2)  |
|                                                |            |            |             |           | C(18)  | -1.433(2) |        |           |        |           |         |           |
| Nr 11                                          | P          | Q          | R           | S         | Sigref | 0.002     | Sigpln | 0.046     | Chisq  | 692.0     | Pl.Hyp. | P<5       |
| Plan                                           | -0.605(2)  | 0.7670(16) | -0.2138(8)  | 4.49(2)   | #N(2)  | 0.026(2)  | #C(10) | -0.022(2) | #C(20) | 0.020(2)  | #C(21)  | -0.024(2) |
| A 4                                            | -3.034(11) | 14.33(3)   | -5.44(2)    | 4.49(2)   | 0(6)   | 0.109(1)  | 0(7)   | -0.409(1) | 0(8)   | -0.293(1) | C(9)    | -1.191(2) |
|                                                |            |            |             |           | C(11)  | 1.188(2)  | C(12)  | 1.257(2)  | C(13)  | 0.126(2)  | C(14)   | -1.104(2) |
|                                                |            |            |             |           | C(22)  | 1.233(2)  | C(23)  | -0.272(2) | C(24)  | -0.434(2) |         |           |
| Nr 12                                          | P          | Q          | R           | S         | Sigref | 0.002     | Sigpln | 0.035     | Chisq  | 2379.7    | Pl.Hyp. | P<5       |
| Plan                                           | 0.7309(3)  | 0.6016(4)  | -0.3223(4)  | 4.007(6)  | #0(1)  | 0.034(2)  | #C(1)  | -0.005(2) | #C(2)  | 0.007(2)  | #C(3)   | -0.036(2) |
| A 10                                           | 3.6651(14) | 11.243(8)  | -8.199(10)  | 4.007(6)  | #C(4)  | -0.013(2) | #C(5)  | 0.007(2)  | #C(6)  | 0.014(2)  | #C(7)   | 0.056(2)  |
|                                                |            |            |             |           | #C(14) | -0.043(2) | #C(15) | -0.022(2) | S(2)   | -0.132(1) | 0(2)    | 0.633(1)  |
|                                                |            |            |             |           | 0(3)   | 0.821(2)  | 0(8)   | -1.100(1) | N(1)   | -1.075(2) | N(2)    | -0.331(2) |
|                                                |            |            |             |           | C(8)   | 0.297(2)  | C(9)   | 0.151(2)  | C(10)  | 0.223(2)  | C(11)   | -0.015(2) |
|                                                |            |            |             |           | C(12)  | -0.234(2) | C(13)  | -0.217(2) | C(16)  | -1.226(2) | C(20)   | 0.656(2)  |
|                                                |            |            |             |           | C(21)  | -0.029(2) | C(22)  | 0.784(2)  | C(23)  | -1.328(2) |         |           |
| Nr 13                                          | P          | Q          | R           | S         | Sigref | 0.002     | Sigpln | 0.011     | Chisq  | 43.3      | Pl.Hyp. | P<5       |
| Plan                                           | 0.6827(7)  | 0.4741(9)  | -0.5561(8)  | 0.044(15) | #0(2)  | 0.004(1)  | #C(7)  | 0.003(2)  | #C(8)  | -0.010(2) | #C(9)   | 0.003(2)  |
| A 4                                            | 3.424(4)   | 8.859(17)  | -14.14(2)   | 0.044(15) | 0(1)   | 0.834(2)  | 0(3)   | 0.090(2)  | 0(6)   | 0.950(1)  | N(2)    | -1.318(2) |
|                                                |            |            |             |           | C(1)   | 0.473(2)  | C(2)   | 0.327(2)  | C(3)   | 0.518(2)  | C(4)    | 0.405(2)  |
|                                                |            |            |             |           | C(5)   | 0.057(2)  | C(6)   | -0.175(2) | C(10)  | -0.152(2) | C(11)   | -0.240(2) |
|                                                |            |            |             |           | C(12)  | -0.085(2) | C(13)  | 0.158(2)  | C(14)  | 0.186(2)  | C(15)   | -0.600(2) |
|                                                |            |            |             |           | C(20)  | -0.122(2) | C(21)  | -1.406(2) | C(22)  | -0.777(2) |         |           |
| Nr 14                                          | P          | Q          | R           | S         | Sigref | 0.002     | Sigpln | 0.043     | Chisq  | 2685.3    | Pl.Hyp. | P<5       |
| Plan                                           | 0.6541(4)  | 0.6071(4)  | -0.4512(5)  | 2.494(9)  | #C(1)  | 0.040(2)  | #C(8)  | -0.048(2) | #C(9)  | -0.004(2) | #C(10)  | 0.063(2)  |
| A 8                                            | 3.2799(19) | 11.345(8)  | -11.478(13) | 2.494(9)  | #C(11) | 0.002(2)  | #C(12) | -0.034(2) | #C(13) | -0.008(2) | #C(14)  | -0.011(2) |
|                                                |            |            |             |           | S(2)   | -0.617(1) | 0(1)   | 0.240(2)  | 0(2)   | 0.128(1)  | 0(3)    | -0.028(2) |
|                                                |            |            |             |           | 0(6)   | 1.449(1)  | N(2)   | -0.776(2) | C(2)   | -0.139(2) | C(3)    | -0.170(2) |
|                                                |            |            |             |           | C(4)   | -0.321(2) | C(5)   | -0.485(2) | C(6)   | -0.493(2) | C(7)    | -0.276(2) |
|                                                |            |            |             |           | C(15)  | -0.739(2) | C(20)  | 0.307(2)  | C(21)  | -0.664(2) | C(22)   | 0.170(2)  |
| Nr 15                                          | P          | Q          | R           | S         | Sigref | 0.002     | Sigpln | 0.047     | Chisq  | 2118.6    | Pl.Hyp. | P<5       |
| Plan                                           | 0.6508(3)  | 0.5608(10) | -0.5118(9)  | 1.31(2)   | #0(2)  | 0.039(1)  | #C(8)  | -0.051(2) | #C(9)  | 0.016(2)  | #C(10)  | 0.003(2)  |
| A 6                                            | 3.2637(16) | 10.480(18) | -13.02(2)   | 1.31(2)   | #C(11) | -0.036(2) | #C(12) | 0.029(2)  | S(2)   | -1.043(1) | 0(1)    | 0.534(2)  |

|  |  |  |  |  |        |            |        |            |        |            |        |            |
|--|--|--|--|--|--------|------------|--------|------------|--------|------------|--------|------------|
|  |  |  |  |  | O (3)  | -0.092 (2) | O (6)  | 1.246 (1)  | N (2)  | -1.004 (2) | C (1)  | 0.248 (2)  |
|  |  |  |  |  | C (2)  | 0.046 (2)  | C (3)  | 0.097 (2)  | C (4)  | -0.072 (2) | C (5)  | -0.334 (2) |
|  |  |  |  |  | C (6)  | -0.425 (2) | C (7)  | -0.191 (2) | C (13) | 0.134 (2)  | C (14) | 0.110 (2)  |
|  |  |  |  |  | C (15) | -0.772 (2) | C (20) | 0.137 (2)  | C (21) | -0.997 (2) | C (22) | -0.232 (2) |

| Nr 16 | P          | Q           | R           | S          | Sigref | 0.002      | Sigpln  | 0.030      | Chisq   | 268.6      | Pl. Hyp. | P<5        |
|-------|------------|-------------|-------------|------------|--------|------------|---------|------------|---------|------------|----------|------------|
| Plan  | 0.6139 (9) | 0.5458 (9)  | -0.5704 (8) | 0.378 (17) | #C (9) | 0.009 (2)  | #C (10) | -0.026 (2) | #C (11) | 0.009 (2)  | #C (20)  | 0.008 (2)  |
| A 4   | 3.078 (4)  | 10.199 (16) | -14.51 (2)  | 0.378 (17) | S (2)  | -1.274 (1) | O (1)   | 0.725 (2)  | O (2)   | -0.130 (1) | O (3)    | -0.384 (2) |
|       |            |             |             |            | O (6)  | 1.077 (1)  | N (2)   | -1.172 (2) | C (1)   | 0.360 (2)  | C (2)    | 0.082 (2)  |
|       |            |             |             |            | C (3)  | 0.157 (2)  | C (4)   | -0.081 (2) | C (5)   | -0.435 (2) | C (6)    | -0.551 (2) |
|       |            |             |             |            | C (7)  | -0.248 (2) | C (8)   | -0.135 (2) | C (12)  | 0.167 (2)  | C (13)   | 0.293 (2)  |
|       |            |             |             |            | C (14) | 0.198 (2)  | C (15)  | -0.999 (2) | C (21)  | -1.263 (2) | C (22)   | -0.515 (2) |

| Nr 17 | P           | Q           | R           | S          | Sigref | 0.002      | Sigpln | 0.021      | Chisq   | 162.6      | Pl. Hyp. | P<5        |
|-------|-------------|-------------|-------------|------------|--------|------------|--------|------------|---------|------------|----------|------------|
| Plan  | -0.6444 (7) | 0.7299 (6)  | -0.2279 (9) | 3.805 (18) | #O (6) | 0.007 (1)  | #N (2) | 0.006 (2)  | #C (10) | 0.005 (2)  | #C (20)  | -0.018 (2) |
| A 4   | -3.232 (4)  | 13.640 (12) | -5.80 (2)   | 3.805 (18) | O (7)  | -0.384 (1) | O (8)  | -0.385 (1) | C (9)   | -1.139 (2) | C (11)   | 1.248 (2)  |
|       |             |             |             |            | C (12) | 1.370 (2)  | C (13) | 0.258 (2)  | C (14)  | -1.001 (2) | C (21)   | -0.101 (2) |
|       |             |             |             |            | C (22) | 1.105 (2)  | C (23) | -0.314 (2) | C (24)  | -0.498 (2) |          |            |

| Nr 18 | P           | Q           | R           | S          | Sigref  | 0.002      | Sigpln | 0.012      | Chisq  | 115.0      | Pl. Hyp. | P<5        |
|-------|-------------|-------------|-------------|------------|---------|------------|--------|------------|--------|------------|----------|------------|
| Plan  | -0.7141 (6) | 0.6913 (7)  | -0.1102 (6) | 4.929 (13) | #O (7)  | -0.001 (1) | #O (8) | 0.009 (1)  | #N (2) | 0.009 (1)  | #C (21)  | -0.009 (2) |
| A 5   | -3.581 (3)  | 12.919 (12) | -2.804 (14) | 4.929 (13) | #C (23) | -0.008 (2) | O (6)  | -0.289 (1) | C (9)  | -1.461 (2) | C (10)   | -0.260 (2) |
|       |             |             |             |            | C (11)  | 0.954 (2)  | C (12) | 0.980 (2)  | C (13) | -0.198 (2) | C (14)   | -1.422 (2) |
|       |             |             |             |            | C (20)  | -0.206 (2) | C (22) | 1.148 (2)  | C (24) | 0.102 (3)  |          |            |

(Acute) Angles (Degrees) Between Planes (Numbers I, J from List Above)

|         |            |         |            |         |            |         |            |         |            |         |            |         |            |
|---------|------------|---------|------------|---------|------------|---------|------------|---------|------------|---------|------------|---------|------------|
| 1, 2=   | 4.45 (9)   | 1, 3=   | 5.72 (9)   | 1, 4=   | 2.14 (7)   | 1, 5=   | 2.99 (7)   | 1, 6=   | 1.08 (7)   | 1, 7=   | 20.32 (6)  | 1, 8=   | 59.36 (10) |
| 1, 9=   | 86.11 (9)  | 1, 10=  | 61.46 (16) | 1, 11=  | 85.05 (17) | 1, 12=  | 5.64 (7)   | 1, 13=  | 9.92 (10)  | 1, 14=  | 4.93 (7)   | 1, 15=  | 6.86 (10)  |
| 1, 16=  | 10.89 (10) | 1, 17=  | 87.53 (10) | 1, 18=  | 85.59 (9)  | 2, 3=   | 9.19 (9)   | 2, 4=   | 2.46 (8)   | 2, 5=   | 6.62 (8)   | 2, 6=   | 4.34 (7)   |
| 2, 7=   | 16.09 (7)  | 2, 8=   | 62.67 (10) | 2, 9=   | 85.65 (9)  | 2, 10=  | 61.03 (17) | 2, 11=  | 85.65 (17) | 2, 12=  | 1.42 (8)   | 2, 13=  | 14.30 (10) |
| 2, 14=  | 8.04 (8)   | 2, 15=  | 11.11 (10) | 2, 16=  | 15.17 (11) | 2, 17=  | 88.28 (10) | 2, 18=  | 85.19 (9)  | 3, 4=   | 7.57 (7)   | 3, 5=   | 2.75 (7)   |
| 3, 6=   | 5.13 (7)   | 3, 7=   | 25.22 (6)  | 3, 8=   | 59.94 (10) | 3, 9=   | 89.07 (9)  | 3, 10=  | 57.55 (16) | 3, 11=  | 80.16 (17) | 3, 12=  | 9.83 (7)   |
| 3, 13=  | 9.01 (10)  | 3, 14=  | 1.28 (8)   | 3, 15=  | 3.29 (10)  | 3, 16=  | 6.77 (11)  | 3, 17=  | 82.54 (10) | 3, 18=  | 89.64 (9)  | 4, 5=   | 4.83 (5)   |
| 4, 6=   | 2.44 (5)   | 4, 7=   | 18.17 (4)  | 4, 8=   | 60.49 (8)  | 4, 9=   | 85.32 (7)  | 4, 10=  | 61.82 (16) | 4, 11=  | 85.90 (16) | 4, 12=  | 3.80 (5)   |
| 4, 13=  | 11.85 (9)  | 4, 14=  | 6.59 (6)   | 4, 15=  | 9.00 (9)   | 4, 16=  | 13.03 (9)  | 4, 17=  | 88.45 (9)  | 4, 18=  | 84.82 (7)  | 5, 6=   | 2.40 (5)   |
| 5, 7=   | 22.71 (4)  | 5, 8=   | 59.83 (8)  | 5, 9=   | 88.74 (7)  | 5, 10=  | 59.25 (16) | 5, 11=  | 82.39 (16) | 5, 12=  | 7.44 (5)   | 5, 13=  | 9.23 (9)   |
| 5, 14=  | 2.00 (6)   | 5, 15=  | 4.64 (9)   | 5, 16=  | 8.66 (9)   | 5, 17=  | 84.83 (9)  | 5, 18=  | 88.19 (7)  | 6, 7=   | 20.40 (3)  | 6, 8=   | 60.26 (8)  |
| 6, 9=   | 87.14 (7)  | 6, 10=  | 60.39 (15) | 6, 11=  | 84.03 (16) | 6, 12=  | 5.33 (5)   | 6, 13=  | 10.44 (9)  | 6, 14=  | 4.18 (5)   | 6, 15=  | 6.77 (8)   |
| 6, 16=  | 10.83 (9)  | 6, 17=  | 86.53 (8)  | 6, 18=  | 86.61 (7)  | 7, 8=   | 71.01 (8)  | 7, 9=   | 78.69 (6)  | 7, 10=  | 66.60 (15) | 7, 11=  | 86.58 (16) |
| 7, 12=  | 15.40 (4)  | 7, 13=  | 29.36 (8)  | 7, 14=  | 24.01 (4)  | 7, 15=  | 27.15 (8)  | 7, 16=  | 31.20 (9)  | 7, 17=  | 83.58 (8)  | 7, 18=  | 78.47 (6)  |
| 8, 9=   | 56.73 (10) | 8, 10=  | 70.55 (17) | 8, 11=  | 63.18 (17) | 8, 12=  | 64.08 (8)  | 8, 13=  | 50.93 (11) | 8, 14=  | 60.75 (9)  | 8, 15=  | 56.73 (11) |
| 8, 16=  | 54.76 (11) | 8, 17=  | 63.28 (11) | 8, 18=  | 55.74 (10) | 9, 10=  | 34.72 (16) | 9, 11=  | 8.97 (17)  | 9, 12=  | 86.40 (7)  | 9, 13=  | 85.02 (10) |
| 9, 14=  | 89.31 (8)  | 9, 15=  | 89.43 (10) | 9, 16=  | 89.23 (10) | 9, 17=  | 7.26 (10)  | 9, 18=  | 0.99 (9)   | 10, 11= | 27.3 (2)   | 10, 12= | 60.08 (16) |
| 10, 13= | 65.18 (17) | 10, 14= | 57.45 (16) | 10, 15= | 59.80 (17) | 10, 16= | 59.72 (17) | 10, 17= | 30.41 (17) | 10, 18= | 34.94 (16) | 11, 12= | 84.95 (16) |

|         |           |         |           |         |           |         |           |         |           |         |          |         |          |
|---------|-----------|---------|-----------|---------|-----------|---------|-----------|---------|-----------|---------|----------|---------|----------|
| 11, 13= | 86.02(18) | 11, 14= | 80.42(16) | 11, 15= | 81.62(18) | 11, 16= | 80.27(18) | 11, 17= | 3.20(18)  | 11, 18= | 9.66(17) | 12, 13= | 15.55(9) |
| 12, 14= | 8.61(6)   | 12, 15= | 12.04(9)  | 12, 16= | 16.09(9)  | 12, 17= | 87.62(9)  | 12, 18= | 85.96(7)  | 13, 14= | 9.85(9)  | 13, 15= | 5.87(11) |
| 13, 16= | 5.75(12)  | 13, 17= | 88.12(11) | 13, 18= | 84.35(10) | 14, 15= | 4.37(9)   | 14, 16= | 8.02(10)  | 14, 17= | 82.85(9) | 14, 18= | 89.86(8) |
| 15, 16= | 4.06(11)  | 15, 17= | 83.88(11) | 15, 18= | 88.82(10) | 16, 17= | 82.37(11) | 16, 18= | 89.90(10) | 17, 18= | 8.15(10) |         |          |

(Acute) Angles (Degrees) Between Axes, Lines, and Bonds with L. S.-Planes

| Bond / Plane | NM → M | 1          | 2          | 3          | 4          | 5          | 6          | 7          | 8          | 9          | 10         |
|--------------|--------|------------|------------|------------|------------|------------|------------|------------|------------|------------|------------|
| Axes 0 → a   | / OM = | 45.77(6),  | 47.42(7),  | 40.22(6),  | 47.11(4),  | 42.83(4),  | 44.90(3),  | 55.96(1),  | 34.07(7),  | 45.33(6),  | 10.63(15), |
|              | 1M =   | 37.23(16), | 46.96(4),  | 43.05(8),  | 40.85(4),  | 40.60(8),  | 37.87(8),  | 40.12(8),  | 45.57(6),  |            |            |
| b            | / OM = | 34.27(6),  | 35.81(7),  | 36.94(6),  | 34.47(4),  | 35.89(4),  | 35.34(3),  | 33.67(1),  | 20.79(7),  | 43.74(6),  | 76.11(15), |
|              | 1M =   | 50.08(16), | 36.99(4),  | 28.30(8),  | 37.38(4),  | 34.11(8),  | 33.08(8),  | 46.88(8),  | 43.74(6),  |            |            |
| c            | / OM = | 24.31(6),  | 19.87(7),  | 28.10(6),  | 22.22(4),  | 26.15(4),  | 24.13(3),  | 4.44(1),   | 48.45(7),  | 7.31(6),   | 8.84(15),  |
|              | 1M =   | 12.34(16), | 18.80(4),  | 33.78(8),  | 26.82(4),  | 30.78(8),  | 34.78(8),  | 13.17(8),  | 6.33(6),   |            |            |
| a*           | / OM = | 45.77(6),  | 47.42(7),  | 40.22(6),  | 47.11(4),  | 42.83(4),  | 44.90(3),  | 55.96(1),  | 34.07(7),  | 45.33(6),  | 10.63(15), |
|              | 1M =   | 37.23(16), | 46.96(4),  | 43.05(8),  | 40.85(4),  | 40.60(8),  | 37.87(8),  | 40.12(8),  | 45.57(6),  |            |            |
| b*           | / OM = | 34.27(6),  | 35.81(7),  | 36.94(6),  | 34.47(4),  | 35.89(4),  | 35.34(3),  | 33.67(1),  | 20.79(7),  | 43.74(6),  | 76.11(15), |
|              | 1M =   | 50.08(16), | 36.99(4),  | 28.30(8),  | 37.38(4),  | 34.11(8),  | 33.08(8),  | 46.88(8),  | 43.74(6),  |            |            |
| c*           | / OM = | 24.31(6),  | 19.87(7),  | 28.10(6),  | 22.22(4),  | 26.15(4),  | 24.13(3),  | 4.44(1),   | 48.45(7),  | 7.31(6),   | 8.84(15),  |
|              | 1M =   | 12.34(16), | 18.80(4),  | 33.78(8),  | 26.82(4),  | 30.78(8),  | 34.78(8),  | 13.17(8),  | 6.33(6),   |            |            |
| S(1) -C(17)  | / OM = | 19.73(9),  | 15.28(9),  | 23.13(9),  | 17.68(7),  | 21.35(7),  | 19.46(7),  | 0.32(6),   | 51.21(10), | 3.03(9),   | 2.41(16),  |
|              | 1M =   | 7.41(17),  | 14.14(7),  | 29.44(10), | 21.86(7),  | 25.97(10), | 29.88(10), | 8.49(10),  | 2.06(9),   |            |            |
| S(2) -C(22)  | / OM = | 30.48(9),  | 31.13(9),  | 25.45(9),  | 31.38(7),  | 27.77(7),  | 29.48(7),  | 37.41(6),  | 41.62(10), | 63.19(9),  | 28.91(16), |
|              | 1M =   | 54.51(17), | 30.40(7),  | 30.51(10), | 25.79(8),  | 26.64(10), | 24.83(11), | 57.05(10), | 63.60(9),  |            |            |
| O(1) -C(1)   | / OM = | 7.45(11),  | 3.01(12),  | 10.70(11), | 5.43(10),  | 8.97(10),  | 7.13(10),  | 11.62(9),  | 46.79(12), | 1.71(11),  | 5.70(18),  |
|              | 1M =   | 4.33(18),  | 1.83(10),  | 17.25(12), | 9.43(10),  | 13.58(12), | 17.45(13), | 6.02(12),  | 0.81(11),  |            |            |
| O(2) -C(8)   | / OM = | 10.39(11), | 14.84(11), | 7.00(11),  | 12.42(10), | 8.80(10),  | 10.69(10), | 29.45(9),  | 33.74(12), | 3.95(11),  | 13.31(18), |
|              | 1M =   | 3.81(18),  | 16.00(10), | 0.62(12),  | 8.27(10),  | 4.18(12),  | 0.26(13),  | 6.26(12),  | 3.22(11),  |            |            |
| O(3) -C(15)  | / OM = | 40.06(11), | 43.20(11), | 34.38(11), | 41.94(10), | 37.13(10), | 39.50(10), | 57.07(9),  | 16.90(12), | 38.93(11), | 5.61(18),  |
|              | 1M =   | 32.74(18), | 43.32(10), | 34.16(12), | 35.36(10), | 33.62(12), | 30.05(13), | 35.93(12), | 38.80(11), |            |            |
| O(4) -C(18)  | / OM = | 58.36(16), | 62.38(16), | 56.46(16), | 59.98(15), | 57.67(15), | 59.00(15), | 69.65(14), | 0.43(16),  | 5.79(16),  | 39.9(2),   |
|              | 1M =   | 12.6(2),   | 63.77(15), | 48.58(16), | 57.66(15), | 53.32(16), | 49.75(17), | 9.47(16),  | 5.76(16),  |            |            |
| O(5) -C(18)  | / OM = | 21.80(11), | 25.45(11), | 16.31(11), | 23.83(9),  | 19.00(9),  | 21.40(9),  | 40.91(9),  | 0.76(11),  | 38.80(11), | 11.55(17), |
|              | 1M =   | 35.92(18), | 25.85(9),  | 14.90(12), | 17.42(10), | 15.07(12), | 11.27(12), | 38.93(12), | 38.26(11), |            |            |
|              | -C(19) | / OM =     | 34.23(13), | 32.44(14), | 39.70(13), | 32.89(13), | 37.15(12), | 35.11(12), | 20.35(12), | 2.15(14),  | 48.91(13), |
|              | 1M =   | 57.7(2),   | 32.74(12), | 35.30(14), | 39.14(13), | 38.94(14), | 40.97(15), | 56.08(14), | 48.11(13), |            |            |
| O(6) -C(20)  | / OM = | 70.71(11), | 75.13(11), | 67.13(11), | 72.68(10), | 69.12(10), | 71.04(10), | 82.36(9),  | 14.68(12), | 3.67(11),  | 31.04(18), |
|              | 1M =   | 4.18(18),  | 76.34(10), | 60.84(12), | 68.41(10), | 64.49(12), | 60.50(13), | 1.17(12),  | 3.89(11),  |            |            |
| O(7) -C(23)  | / OM = | 59.08(11), | 63.42(12), | 56.15(11), | 60.96(10), | 57.82(10), | 59.53(10), | 74.05(10), | 3.32(12),  | 0.33(11),  | 33.72(18), |
|              | 1M =   | 6.50(18),  | 64.71(10), | 49.16(12), | 57.42(10), | 53.25(12), | 49.39(13), | 3.33(12),  | 0.35(11),  |            |            |
| O(8) -C(23)  | / OM = | 4.27(11),  | 8.70(11),  | 1.19(11),  | 6.26(10),  | 2.85(9),   | 4.63(9),   | 22.90(9),  | 40.64(11), | 0.06(11),  | 13.57(17), |
|              | 1M =   | 0.89(18),  | 9.90(9),   | 5.59(12),  | 2.45(10),  | 1.74(12),  | 5.58(12),  | 3.09(12),  | 0.74(11),  |            |            |
|              | -C(24) | / OM =     | 60.05(13), | 55.61(14), | 62.85(13), | 58.04(12), | 61.42(12), | 59.70(12), | 40.63(12), | 51.30(14), | 2.80(13),  |
|              | 1M =   | 5.6(2),    | 54.42(12), | 69.84(14), | 61.64(13), | 65.94(14), | 69.56(15), | 4.46(14),  | 3.68(13),  |            |            |
| N(1) -C(15)  | / OM = | 56.37(10), | 53.26(11), | 55.04(11), | 55.37(9),  | 55.57(9),  | 55.41(9),  | 44.26(9),  | 64.02(11), | 25.21(11), | 0.01(17),  |

|       |        |        |            |            |            |            |            |            |            |            |            |            |
|-------|--------|--------|------------|------------|------------|------------|------------|------------|------------|------------|------------|------------|
|       |        | 1M =   | 16.63(18), | 51.85(9),  | 63.91(12), | 54.40(10), | 58.05(12), | 59.13(12), | 17.95(12), | 26.06(11), |            |            |
|       | -C(16) | / OM = | 11.50(10), | 7.04(10),  | 15.08(10), | 9.43(9),   | 13.21(9),  | 11.25(8),  | 8.07(8),   | 45.56(11), | 5.71(10),  | 0.06(17),  |
|       |        | 1M =   | 8.93(18),  | 5.93(9),   | 21.13(11), | 13.80(9),  | 17.84(11), | 21.79(12), | 10.44(11), | 4.78(10),  |            |            |
| N(2)  | -C(20) | / OM = | 52.77(10), | 48.44(11), | 54.78(11), | 50.90(9),  | 53.70(9),  | 52.25(9),  | 34.51(9),  | 59.78(11), | 8.22(10),  | 10.75(17), |
|       |        | 1M =   | 0.26(18),  | 47.15(9),  | 62.68(12), | 53.63(10), | 58.00(12), | 61.29(12), | 1.03(11),  | 9.15(11),  |            |            |
|       | -C(21) | / OM = | 6.36(10),  | 10.80(10), | 3.17(10),  | 8.37(9),   | 4.88(9),   | 6.70(8),   | 25.16(8),  | 38.24(11), | 1.45(10),  | 13.46(17), |
|       |        | 1M =   | 1.95(18),  | 11.99(9),  | 3.47(11),  | 4.44(9),   | 0.28(11),  | 3.59(12),  | 4.24(11),  | 0.67(10),  |            |            |
| C(1)  | -C(2)  | / OM = | 2.01(13),  | 0.51(13),  | 7.71(13),  | 0.37(12),  | 5.00(12),  | 2.74(12),  | 13.64(12), | 6.30(14),  | 61.15(13), | 42.66(19), |
|       |        | 1M =   | 63.13(19), | 0.42(12),  | 5.61(14),  | 6.91(12),  | 7.76(14),  | 10.72(14), | 65.27(14), | 60.22(13), |            |            |
|       | -C(14) | / OM = | 4.81(13),  | 2.76(13),  | 2.47(13),  | 4.38(12),  | 3.40(12),  | 3.76(12),  | 0.77(12),  | 58.11(14), | 56.73(13), | 51.28(19), |
|       |        | 1M =   | 53.9(2),   | 1.47(12),  | 11.13(14), | 1.98(12),  | 5.32(14),  | 6.27(14),  | 52.45(14), | 57.59(13), |            |            |
| C(2)  | -C(3)  | / OM = | 1.55(14),  | 0.48(14),  | 0.79(14),  | 1.13(13),  | 0.14(13),  | 0.50(13),  | 2.24(12),  | 55.29(14), | 56.74(14), | 54.2(2),   |
|       |        | 1M =   | 54.7(2),   | 1.76(13),  | 7.89(15),  | 1.28(13),  | 2.07(15),  | 3.05(15),  | 53.05(15), | 57.54(14), |            |            |
|       | -C(7)  | / OM = | 3.59(14),  | 0.86(14),  | 6.87(14),  | 1.56(13),  | 5.13(13),  | 3.27(13),  | 15.49(12), | 44.13(14), | 2.27(14),  | 7.4(2),    |
|       |        | 1M =   | 4.3(2),    | 2.03(13),  | 13.38(15), | 5.60(13),  | 9.74(15),  | 13.62(15), | 6.17(14),  | 1.39(14),  |            |            |
| C(3)  | -C(4)  | / OM = | 1.33(14),  | 1.09(14),  | 7.02(14),  | 0.28(13),  | 4.31(13),  | 2.08(13),  | 13.94(12), | 8.00(14),  | 62.83(14), | 43.5(2),   |
|       |        | 1M =   | 64.6(2),   | 0.96(13),  | 4.68(15),  | 6.24(13),  | 6.97(15),  | 9.85(15),  | 66.82(15), | 61.91(14), |            |            |
| C(4)  | -C(5)  | / OM = | 4.78(14),  | 0.33(14),  | 8.08(14),  | 2.75(13),  | 6.33(13),  | 4.47(13),  | 14.33(12), | 44.71(15), | 2.43(14),  | 6.6(2),    |
|       |        | 1M =   | 4.6(2),    | 0.83(13),  | 14.56(15), | 6.81(13),  | 10.94(15), | 14.83(15), | 6.46(15),  | 1.55(14),  |            |            |
| C(5)  | -C(6)  | / OM = | 3.11(14),  | 1.01(14),  | 0.85(14),  | 2.65(13),  | 1.74(13),  | 2.06(13),  | 1.10(12),  | 57.10(14), | 55.91(14), | 52.4(2),   |
|       |        | 1M =   | 53.5(2),   | 0.29(13),  | 9.55(15),  | 0.34(13),  | 3.73(15),  | 4.75(15),  | 51.94(15), | 56.74(14), |            |            |
| C(6)  | -C(7)  | / OM = | 3.99(14),  | 1.59(14),  | 9.68(14),  | 2.39(13),  | 6.97(13),  | 4.75(13),  | 11.29(12), | 6.85(14),  | 62.47(14), | 45.3(2),   |
|       |        | 1M =   | 65.2(2),   | 1.71(13),  | 7.26(15),  | 8.90(13),  | 9.61(14),  | 12.46(15), | 67.10(14), | 61.51(14), |            |            |
|       | -C(15) | / OM = | 6.91(13),  | 2.46(13),  | 10.69(13), | 4.81(12),  | 8.72(12),  | 6.71(12),  | 12.86(11), | 41.00(14), | 8.52(13),  | 0.05(19),  |
|       |        | 1M =   | 11.06(19), | 1.38(12),  | 16.44(14), | 9.41(12),  | 13.36(14), | 17.36(14), | 12.79(14), | 7.61(13),  |            |            |
| C(7)  | -C(8)  | / OM = | 5.93(10),  | 7.95(10),  | 8.24(10),  | 6.35(9),   | 7.34(9),   | 6.98(8),   | 9.28(8),   | 48.73(11), | 55.39(10), | 60.32(17), |
|       |        | 1M =   | 55.42(17), | 9.22(8),   | 0.47(11),  | 8.74(9),   | 5.36(11),  | 4.30(11),  | 53.20(11), | 56.04(10), |            |            |
| C(8)  | -C(9)  | / OM = | 3.20(13),  | 5.70(13),  | 2.51(13),  | 4.84(12),  | 0.21(12),  | 2.46(12),  | 18.72(12), | 8.93(14),  | 61.75(13), | 39.30(19), |
|       |        | 1M =   | 62.0(2),   | 5.61(12),  | 0.48(14),  | 1.70(12),  | 2.57(14),  | 5.55(14),  | 64.59(14), | 60.91(13), |            |            |
| C(9)  | -C(10) | / OM = | 0.21(10),  | 1.70(11),  | 2.27(10),  | 0.15(9),   | 1.28(9),   | 0.85(9),   | 2.95(8),   | 53.29(11), | 58.22(10), | 56.15(17), |
|       |        | 1M =   | 56.56(18), | 2.97(9),   | 6.34(11),  | 2.73(9),   | 0.55(11),  | 1.43(12),  | 54.80(11), | 59.00(10), |            |            |
|       | -C(14) | / OM = | 2.31(10),  | 6.75(11),  | 0.98(10),  | 4.33(9),   | 0.77(9),   | 2.62(9),   | 21.30(8),  | 40.33(11), | 2.41(10),  | 10.45(17), |
|       |        | 1M =   | 3.54(18),  | 7.92(9),   | 7.49(11),  | 0.29(9),   | 3.84(11),  | 7.73(12),  | 5.67(11),  | 1.59(10),  |            |            |
| C(10) | -C(11) | / OM = | 7.41(14),  | 9.94(14),  | 1.70(14),  | 9.06(13),  | 4.42(13),  | 6.68(13),  | 22.92(12), | 10.66(14), | 61.19(14), | 36.1(2),   |
|       |        | 1M =   | 60.1(2),   | 9.85(13),  | 3.61(15),  | 2.51(13),  | 1.61(15),  | 1.41(15),  | 62.96(15), | 60.43(14), |            |            |
|       | -C(20) | / OM = | 11.00(13), | 15.41(13), | 8.06(13),  | 12.96(12), | 9.66(12),  | 11.40(12), | 29.26(11), | 36.69(14), | 1.35(13),  | 18.36(19), |
|       |        | 1M =   | 1.57(19),  | 16.64(12), | 1.11(14),  | 9.31(12),  | 5.10(14),  | 1.29(14),  | 0.88(14),  | 2.07(13),  |            |            |
| C(11) | -C(12) | / OM = | 3.43(14),  | 7.87(14),  | 0.20(14),  | 5.44(13),  | 1.93(13),  | 3.76(13),  | 22.34(12), | 39.94(14), | 1.89(14),  | 11.5(2),   |
|       |        | 1M =   | 2.9(2),    | 9.06(13),  | 6.38(15),  | 1.46(13),  | 2.68(15),  | 6.56(15),  | 5.02(15),  | 1.09(14),  |            |            |
| C(12) | -C(13) | / OM = | 3.96(14),  | 1.98(14),  | 1.52(14),  | 3.56(13),  | 2.50(13),  | 2.90(13),  | 0.33(12),  | 56.82(15), | 57.78(14), | 52.5(2),   |
|       |        | 1M =   | 55.1(2),   | 0.71(13),  | 10.15(15), | 1.06(13),  | 4.35(15),  | 5.24(15),  | 53.64(15), | 58.63(14), |            |            |
| C(13) | -C(14) | / OM = | 4.79(14),  | 7.28(14),  | 0.91(14),  | 6.43(13),  | 1.81(13),  | 4.06(13),  | 20.21(12), | 9.96(14),  | 62.02(14), | 38.4(2),   |
|       |        | 1M =   | 61.7(2),   | 7.18(13),  | 1.14(15),  | 0.11(13),  | 0.96(15),  | 3.93(15),  | 64.44(15), | 61.21(14), |            |            |
| C(16) | -C(17) | / OM = | 27.66(13), | 26.35(13), | 24.27(13), | 27.63(12), | 25.74(12), | 26.58(12), | 25.95(11), | 62.74(14), | 58.24(13), | 33.12(19), |
|       |        | 1M =   | 50.23(19), | 25.18(12), | 32.06(14), | 24.06(12), | 26.65(14), | 26.55(14), | 51.08(14), | 59.18(13), |            |            |
|       | -C(18) | / OM = | 35.93(13), | 34.62(13), | 41.15(13), | 34.80(12), | 38.74(12), | 36.88(12), | 23.68(11), | 1.22(14),  | 49.22(13), | 69.78(19), |
|       |        | 1M =   | 58.18(19), | 35.08(12), | 35.77(14), | 40.74(12), | 39.97(14), | 41.52(14), | 56.10(14), | 48.53(13), |            |            |
| C(21) | -C(22) | / OM = | 29.74(10), | 31.03(10), | 32.76(10), | 29.81(8),  | 31.53(8),  | 30.82(8),  | 28.27(8),  | 23.56(11), | 49.22(10), | 80.16(17), |

|        |        |            |            |            |            |            |            |            |            |                      |
|--------|--------|------------|------------|------------|------------|------------|------------|------------|------------|----------------------|
| =====  |        |            |            |            |            |            |            |            |            |                      |
|        | 1M =   | 55.39(17), | 32.16(8),  | 24.34(11), | 33.11(9),  | 30.07(11), | 29.35(11), | 52.19(11), | 49.22(10), |                      |
| -C(23) | / OM = | 64.64(13), | 60.20(13), | 68.15(13), | 62.54(12), | 66.40(12), | 64.45(12), | 44.60(11), | 45.40(14), | 0.81(13), 24.44(19), |
|        | 1M =   | 9.46(19),  | 59.12(12), | 73.89(14), | 66.89(12), | 71.03(14), | 74.92(14), | 8.06(14),  | 0.02(13),  |                      |



---

Ring Puckering Analysis (Cremer & Pople) – (e.s.d. following Norrestam, Acta Cryst. (1981), A37, 764–765)

---

### Symmetrical Forms

---

### References

---

6-Membered Rings : C : Chair – Th = 0.0  
 H : Half-Chair– Th = 50.8; Phi = k X 60 + 30  
 E : Envelope – Th = 54.7; Phi = k X 60  
 S : Screw-Boat– Th = 67.5; Phi = k X 60 + 30  
 B : Boat – Th = 90.0; Phi = k X 60  
 T : Twist-Boat– Th = 90.0; Phi = k X 60 + 30

J. C. A. Boeyens, J. Cryst. Mol. Struct. 8, (1978), 317–320

### Definitions (All Values Rounded on Esd)

---

Dev – Deviation of Atom I from Cremer&Pople Plane (Defined Differently from Least-Squares Plane)  
 Cs(I), C2(I) – Mirror Plane and 2-Axis Asym. Par. for Atom I (See Duax et al., Topics in Stereochemistry, V-9, (1976) pp.271–383)  
 Cs(I–J), C2(I–J)– Asymmetry Parameters for Bond I–J  
 Tors(I–J) – Torsion Angle for Bond I–J

### Descriptors for Torsion Angles

---

### Descriptors for Ring Substituents (J. Appl. Cryst., 1983, 16, 431)

---

| Torsion Angle Range | Full Descriptor   | Short Descriptor |
|---------------------|-------------------|------------------|
| 0 TO 30 Deg         | + Syn-Periplanar  | +sp              |
| 30 to 90            | + Syn-Clinal      | +sc              |
| 90 to 150           | + Anti-Clinal     | +ac              |
| 150 to 180          | + Anti-Periplanar | +ap              |
| 0 to -30            | – Syn-Periplanar  | –sp              |
| -30 to -90          | – Syn-Clinal      | –sc              |
| -90 to -150         | – Anti-Clinal     | –ac              |
| -150 to -180        | – Anti-Periplanar | –ap              |

| Angle Range of Subst. | Full Descriptor | Short Descriptor |
|-----------------------|-----------------|------------------|
| 0 TO 30 Deg.          | Axial           | ax               |
| 30 to 60              | Bisectional     | bi               |
| 60 to 90              | Equatorial      | eq               |

\*\*\* NOTE \*\*\* – For Ring Puckering Comparisons: Make Sure that the Absolute Configuration, Pivot Atom and Cyclic Sense Agree.  
 – The "RING AT1 AT2 AT3 ... ATn" Instruction Gives the User Explicit Choice of Pivot Atom (AT1) and Sense (AT2).  
 – Use TRNS Instructions to Obtain the Required Absolute Configuration.  
 – The Values of Theta and Phi [= Phi(2)] Depend on the Abs. Conf. and the Choice of the First and Second Ring Atom.  
 – Alternatively, Appropriate Phase Shifts may be Applied to the Same Effect (see Below)

For Correct Usage of C&P Puckering Parameters see also: D. Cremer, Acta Cryst. (1984). B40, 498–500.

|                                                                             |            |            |            |            |             |            |
|-----------------------------------------------------------------------------|------------|------------|------------|------------|-------------|------------|
| 6-Membered Ring ( 1) C(1) --> C(2) --> C(7) --> C(8) --> C(9) --> C(14) --> |            |            |            |            |             |            |
|                                                                             | sp2        | sp2        | sp2        | sp2        | sp2         | sp2        |
| Dev. (Ang)                                                                  | 0.062(2)   | 0.009(2)   | -0.078(2)  | 0.0769(19) | -0.0063(19) | -0.063(2)  |
| Cs(I)-Asym-Par (Deg)                                                        | 9.5(2)     | 17.5(2)    | 8.0(2)     | 9.5(2)     | 17.5(2)     | 8.0(2)     |
| C2(I)-Asym-Par (Deg)                                                        | 15.3(2)    | 4.2(2)     | 16.1(2)    | 15.3(2)    | 4.2(2)      | 16.1(2)    |
| Ring Bond Angle(Deg)                                                        | 118.07(15) | 120.84(16) | 120.04(16) | 117.89(14) | 120.62(16)  | 120.72(17) |
|                                                                             |            |            |            |            |             |            |
| Tors(I-J) (Deg)                                                             | -3.6(3)    | -8.8(3)    | 14.4(3)    | -7.6(3)    | -4.6(3)     | 10.4(3)    |
| Cs(I-J)-Asym-Par (Deg)                                                      | 7.0(3)     | 7.9(3)     | 13.0(3)    | 7.0(3)     | 7.9(3)      | 13.0(3)    |
| C2(I-J)-Asym-Par (Deg)                                                      | 19.1(3)    | 18.0(3)    | 1.1(3)     | 19.1(3)    | 18.0(3)     | 1.1(3)     |
| Ring Bond Distance (Ang)                                                    | 1.494(3)   | 1.401(3)   | 1.500(2)   | 1.492(3)   | 1.403(2)    | 1.488(3)   |

Weighted Average Ring Bond Distance = 1.4596( 10,202) Ang. - NOTE: 1st esd. Internal, 2nd esd External.  
Weighted Average Abs. Torsion Angl. = 8.23( 12,161) Deg. see: e.g. Domenicano et al., Acta Cryst. (1975), B31, 221-234.

Cremer & Pople Puckering Parameters [D. Cremer & J.A. Pople, J. Amer. Chem. Soc., 97, (1975), 1354-1358]

Q(2) = 0.140(2) Ang., Phi(2) = 329.1(8) Deg  
Q(3) = -0.019(2) Ang.

Puckering Amplitude (Q) = 0.141(2) Ang, Theta = 97.5(8) Deg, Phi = 329.1(8) Deg

\* NOTE \* - A Change of the Absolute Configuration Transforms Theta into 180 - Theta and Phi into 180 + Phi.  
- A Cyclic Forward Shift of the Pivot Atom from At1 to At2 Transforms Theta into 180 - Theta and Phi into Phi + 120.  
- A Change of the Sense Transforms Theta into 180 - Theta and Phi into 180 - Phi, and Vice Versa.

Conformational Analysis (G.G. Evans & J.A. Boeyens, Acta Cryst. (1989), B45, 581-590)

|                                                |           |             |               |
|------------------------------------------------|-----------|-------------|---------------|
| Coefficients of Primitive and Normalised Forms |           |             |               |
| M                                              | Primitive | Coefficient | Angular Value |
| -----                                          |           |             |               |
| CosForm                                        | 2         | 0.004       | 0.028 20.0    |
| SinForm                                        |           | 0.136       | 0.856 22.0    |
|                                                | 3         |             | 0.116 -1.0    |

Centroid Cg(1) : x , y , z 0.69218(16) 0.45847(4) 0.44001(3)  
X0, Y0, Z0 3.4711(8) 8.5675(7) 11.1923(7)

| 6-Membered Ring ( 2) C(2) --> C(3) --> C(4) --> C(5) --> C(6) --> C(7) --> |            |            |            |            |            |            |
|----------------------------------------------------------------------------|------------|------------|------------|------------|------------|------------|
|                                                                            | sp2        | sp2        | sp2        | sp2        | sp2        | sp2        |
| Dev. (Ang)                                                                 | -0.002(2)  | -0.014(2)  | 0.013(2)   | 0.004(2)   | -0.020(2)  | 0.019(2)   |
| Cs(I)-Asym-Par (Deg)                                                       | 4.3(2)     | 2.0(2)     | 2.4(2)     | 4.3(2)     | 2.0(2)     | 2.4(2)     |
| C2(I)-Asym-Par (Deg)                                                       | 1.8(2)     | 4.3(2)     | 4.0(2)     | 1.8(2)     | 4.3(2)     | 4.0(2)     |
| Ring Bond Angle(Deg)                                                       | 120.73(17) | 120.04(18) | 119.45(19) | 121.52(18) | 119.07(17) | 119.07(16) |
|                                                                            |            |            |            |            |            |            |
| Tors(I-J) (Deg)                                                            | -0.8(3)    | 2.2(3)     | -0.5(3)    | -2.6(3)    | 3.9(3)     | -2.3(3)    |
| Cs(I-J)-Asym-Par (Deg)                                                     | 2.4(3)     | 3.6(3)     | 2.2(3)     | 2.4(3)     | 3.6(3)     | 2.2(3)     |
| C2(I-J)-Asym-Par (Deg)                                                     | 4.5(3)     | 0.3(3)     | 4.8(3)     | 4.5(3)     | 0.3(3)     | 4.8(3)     |
| Ring Bond Distance (Ang)                                                   | 1.393(3)   | 1.386(3)   | 1.384(3)   | 1.396(3)   | 1.404(3)   | 1.401(3)   |

Weighted Average Ring Bond Distance = 1.3940( 12, 32) Ang. - NOTE: 1st esd. Internal, 2nd esd External.

Weighted Average Abs. Torsion Angl. = 2.05( 12, 51) Deg. see: e.g. Domenicano et al., Acta Cryst. (1975), B31, 221-234.

No C & P - Puckering Analysis since <Tau> = 2.0 < 5.0 Deg.

|                            |             |            |            |
|----------------------------|-------------|------------|------------|
| Centroid Cg(2) : x , y , z | 1.00902(17) | 0.35716(4) | 0.45143(3) |
| X0, Y0, Z0                 | 5.0599(9)   | 6.6744(7)  | 11.4829(8) |

| 6-Membered Ring ( 3) C(9) --> C(10) --> C(11) --> C(12) --> C(13) --> C(14) --> |             |            |            |            |            |            |
|---------------------------------------------------------------------------------|-------------|------------|------------|------------|------------|------------|
|                                                                                 | sp2         | sp2        | sp2        | sp2        | sp2        | sp2        |
| Dev. (Ang)                                                                      | -0.0249(19) | 0.031(2)   | -0.011(2)  | -0.015(2)  | 0.021(2)   | -0.001(2)  |
| Cs(I)-Asym-Par (Deg)                                                            | 4.2(2)      | 1.9(2)     | 6.1(2)     | 4.2(2)     | 1.9(2)     | 6.1(2)     |
| C2(I)-Asym-Par (Deg)                                                            | 5.3(2)      | 6.5(2)     | 3.0(2)     | 5.3(2)     | 6.5(2)     | 3.0(2)     |
| Ring Bond Angle(Deg)                                                            | 119.30(17)  | 119.42(16) | 120.59(17) | 120.21(18) | 119.85(17) | 120.39(17) |
|                                                                                 |             |            |            |            |            |            |
| Tors(I-J) (Deg)                                                                 | 5.6(3)      | -4.3(3)    | 0.0(3)     | 3.0(3)     | -1.7(3)    | -2.7(3)    |
| Cs(I-J)-Asym-Par (Deg)                                                          | 5.1(3)      | 4.0(3)     | 2.9(3)     | 5.1(3)     | 4.0(3)     | 2.9(3)     |
| C2(I-J)-Asym-Par (Deg)                                                          | 1.7(3)      | 5.7(3)     | 7.3(3)     | 1.7(3)     | 5.7(3)     | 7.3(3)     |
| Ring Bond Distance (Ang)                                                        | 1.401(2)    | 1.395(3)   | 1.390(3)   | 1.380(3)   | 1.396(3)   | 1.403(2)   |

Weighted Average Ring Bond Distance = 1.3965( 10, 33) Ang. - NOTE: 1st esd. Internal, 2nd esd External.

Weighted Average Abs. Torsion Angl. = 2.88( 12, 80) Deg. see: e.g. Domenicano et al., Acta Cryst. (1975), B31, 221-234.

No C & P - Puckering Analysis since <Tau> = 2.9 < 5.0 Deg.

|                            |             |            |            |
|----------------------------|-------------|------------|------------|
| Centroid Cg(3) : x , y , z | 0.35035(16) | 0.55380(4) | 0.43008(3) |
| X0, Y0, Z0                 | 1.7569(8)   | 10.3489(7) | 10.9398(7) |

| 10-Membered Ring ( 4)    | C(1)       | → | C(2)       | → | C(3)       | → | C(4)       | → | C(5)       | → | C(6)        | → | C(7)        | → | C(8)       | → |
|--------------------------|------------|---|------------|---|------------|---|------------|---|------------|---|-------------|---|-------------|---|------------|---|
|                          | sp2        |   | sp2        |   | sp2        |   | sp2        |   | sp2        |   | sp2         |   | sp2         |   | sp2        |   |
| Dev. (Ang)               | 0.008(2)   |   | 0.0041(19) |   | 0.031(2)   |   | 0.043(2)   |   | -0.018(2)  |   | -0.0811(19) |   | -0.0279(19) |   | 0.1391(18) |   |
| Cs(I)-Asym-Par (Deg)     | 158.04(16) |   | 220.70(11) |   | 159.10(16) |   | 107.29(16) |   | 106.41(15) |   | 158.04(16)  |   | 220.70(11)  |   | 159.10(16) |   |
| C2(I)-Asym-Par (Deg)     | 154.14(16) |   | 4.97(18)   |   | 153.04(16) |   | 192.93(13) |   | 193.42(13) |   | 154.14(16)  |   | 4.97(18)    |   | 153.04(16) |   |
| Ring Bond Angle(Deg)     | 118.07(15) |   | 118.43(16) |   | 120.04(18) |   | 119.45(19) |   | 121.52(18) |   | 119.07(17)  |   | 120.58(16)  |   | 117.89(14) |   |
| Tors(I-J) (Deg)          | 176.33(17) |   | 179.30(19) |   | 2.2(3)     |   | -0.5(3)    |   | -2.6(3)    |   | -169.67(17) |   | -172.07(17) |   | -7.6(3)    |   |
| Cs(I-J)-Asym-Par (Deg)   | 129.00(18) |   | 125.94(17) |   | 172.29(17) |   | 5.45(13)   |   | 170.87(17) |   | 129.00(18)  |   | 125.94(17)  |   | 172.29(17) |   |
| C2(I-J)-Asym-Par (Deg)   | 119.73(18) |   | 119.07(17) |   | 176.65(17) |   | 246.73(12) |   | 177.94(17) |   | 119.73(18)  |   | 119.07(17)  |   | 176.65(17) |   |
| Ring Bond Distance (Ang) | 1.494(3)   |   | 1.393(3)   |   | 1.386(3)   |   | 1.384(3)   |   | 1.396(3)   |   | 1.404(3)    |   | 1.500(2)    |   | 1.492(3)   |   |

(Continued) C(9) → C(14) →

|                          |            |            |
|--------------------------|------------|------------|
|                          | sp2        | sp2        |
| Dev. (Ang)               | 0.0074(18) | -0.105(2)  |
| Cs(I)-Asym-Par (Deg)     | 107.29(16) | 106.41(15) |
| C2(I)-Asym-Par (Deg)     | 192.93(13) | 193.42(13) |
| Ring Bond Angle(Deg)     | 120.62(16) | 120.72(17) |
| Tors(I-J) (Deg)          | -4.6(3)    | 10.4(3)    |
| Cs(I-J)-Asym-Par (Deg)   | 5.45(13)   | 170.87(17) |
| C2(I-J)-Asym-Par (Deg)   | 246.73(12) | 177.94(17) |
| Ring Bond Distance (Ang) | 1.403(2)   | 1.488(3)   |

Weighted Average Ring Bond Distance = 1.4375( 8,165) Ang. - NOTE: 1st esd. Internal, 2nd esd External.

Weighted Average Abs. Torsion Angl. = 117.08( 7,999) Deg. see: e.g. Domenicano et al., Acta Cryst. (1975), B31, 221-234.

Cremer & Pople Puckering Parameters [D. Cremer & J.A. Pople, J. Amer. Chem. Soc., 97, (1975), 1354-1358]

|        |                |          |              |
|--------|----------------|----------|--------------|
| Q(2) = | 0.152(2) Ang., | Phi(2) = | 209.0(7) Deg |
| Q(3) = | 0.121(2) Ang., | Phi(3) = | 325.0(9) Deg |
| Q(4) = | 0.057(2) Ang., | Phi(4) = | 26(2) Deg    |
| Q(5) = | 0.000(2) Ang.  |          |              |

Total Puckering Amplitude Q = 0.2021(19) Ang.

Conformational Analysis (G.G. Evans & J.A. Boeyens, Acta Cryst. (1989), B45, 581-590)

| Coefficients of Primitive and Normalised Forms |   |           |             |               |
|------------------------------------------------|---|-----------|-------------|---------------|
|                                                | M | Primitive | Coefficient | Angular Value |
| CosForm                                        | 2 | 0.094     | 0.282       | 24.0          |
| SinForm                                        |   | 0.060     | 0.180       | 22.0          |
| CosForm                                        | 3 | 0.115     | 0.345       | 36.0          |
| SinForm                                        |   | 0.007     | 0.021       | 38.0          |
| CosForm                                        | 4 | 0.026     | 0.077       | 4.0           |
| SinForm                                        |   | 0.032     | 0.096       | 2.0           |
|                                                | 5 |           | 0.000       | 1.0           |

|                          |            |    |             |    |             |    |            |    |            |    |             |    |            |    |            |    |
|--------------------------|------------|----|-------------|----|-------------|----|------------|----|------------|----|-------------|----|------------|----|------------|----|
| 10-Membered Ring ( 5)    | C(1)       | —> | C(2)        | —> | C(7)        | —> | C(8)       | —> | C(9)       | —> | C(10)       | —> | C(11)      | —> | C(12)      | —> |
|                          |            |    | sp2         |    | sp2         |    | sp2        |    | sp2        |    | sp2         |    | sp2        |    | sp2        |    |
| Dev. (Ang)               | 0.114(2)   |    | -0.0202(19) |    | -0.1493(19) |    | 0.0418(18) |    | 0.0403(18) |    | 0.0713(19)  |    | -0.033(2)  |    | -0.076(2)  |    |
| Cs(I)-Asym-Par (Deg)     | 160.44(15) |    | 104.68(15)  |    | 191.38(13)  |    | 161.09(15) |    | 157.21(11) |    | 160.44(15)  |    | 104.68(15) |    | 191.38(13) |    |
| C2(I)-Asym-Par (Deg)     | 152.80(15) |    | 195.27(13)  |    | 111.64(16)  |    | 152.11(15) |    | 156.12(11) |    | 152.80(15)  |    | 195.27(13) |    | 111.64(16) |    |
| Ring Bond Angle(Deg)     | 118.07(15) |    | 120.84(16)  |    | 120.04(16)  |    | 117.89(14) |    | 120.08(15) |    | 119.42(16)  |    | 120.59(17) |    | 120.21(18) |    |
|                          |            |    |             |    |             |    |            |    |            |    |             |    |            |    |            |    |
| Tors(I-J) (Deg)          |            |    | -3.6(3)     |    | -8.8(3)     |    | 14.4(3)    |    | 173.18(17) |    | -175.18(17) |    | -4.3(3)    |    | 0.0(3)     |    |
| Cs(I-J)-Asym-Par (Deg)   |            |    | 174.36(17)  |    | 177.15(12)  |    | 174.79(17) |    | 116.94(17) |    | 124.59(17)  |    | 174.36(17) |    | 177.15(12) |    |
| C2(I-J)-Asym-Par (Deg)   |            |    | 175.91(17)  |    | 173.03(12)  |    | 175.22(17) |    | 129.14(17) |    | 125.10(17)  |    | 175.91(17) |    | 173.03(12) |    |
| Ring Bond Distance (Ang) |            |    | 1.494(3)    |    | 1.401(3)    |    | 1.500(2)   |    | 1.492(3)   |    | 1.401(2)    |    | 1.395(3)   |    | 1.390(3)   |    |

(Continued) C(13) —> C(14) —>

|                          |             |             |     |
|--------------------------|-------------|-------------|-----|
|                          |             | sp2         | sp2 |
| Dev. (Ang)               | -0.015(2)   | 0.025(2)    |     |
| Cs(I)-Asym-Par (Deg)     | 161.09(15)  | 157.21(11)  |     |
| C2(I)-Asym-Par (Deg)     | 152.11(15)  | 156.12(11)  |     |
| Ring Bond Angle(Deg)     | 119.85(17)  | 118.84(16)  |     |
|                          |             |             |     |
| Tors(I-J) (Deg)          | -178.96(18) | -172.31(17) |     |
| Cs(I-J)-Asym-Par (Deg)   | 116.94(17)  | 124.59(17)  |     |
| C2(I-J)-Asym-Par (Deg)   | 129.14(17)  | 125.10(17)  |     |
| Ring Bond Distance (Ang) | 1.396(3)    | 1.488(3)    |     |

Weighted Average Ring Bond Distance = 1.4371( 8,166) Ang. - NOTE: 1st esd. Internal, 2nd esd External.  
Weighted Average Abs. Torsion Angl. = 118.80( 7,999) Deg. see: e.g. Domenicano et al., Acta Cryst. (1975), B31, 221-234.

Cremer & Pople Puckering Parameters [D. Cremer & J.A. Pople, J. Amer. Chem. Soc., 97, (1975), 1354-1358]

|        |                  |          |               |
|--------|------------------|----------|---------------|
| Q(2) = | 0.1951(19) Ang., | Phi(2) = | 36.7(6) Deg   |
| Q(3) = | 0.0685(19) Ang., | Phi(3) = | 346.2(16) Deg |
| Q(4) = | 0.0916(19) Ang., | Phi(4) = | 303.9(12) Deg |
| Q(5) = | -0.0269(19) Ang. |          |               |

Total Puckering Amplitude Q = 0.2274(19) Ang.

Conformational Analysis (G.G. Evans & J.A. Boeyens, Acta Cryst. (1989), B45, 581-590)

| Coefficients of Primitive and Normalised Forms |   |           |             |               |
|------------------------------------------------|---|-----------|-------------|---------------|
|                                                | M | Primitive | Coefficient | Angular Value |
| CosForm                                        | 2 | 0.188     | 0.490       | 4.0           |
| SinForm                                        |   | 0.008     | 0.020       | 6.0           |
| CosForm                                        | 3 | 0.016     | 0.042       | 40.0          |
| SinForm                                        |   | 0.053     | 0.138       | 38.0          |
| CosForm                                        | 4 | 0.011     | 0.028       | 32.0          |
| SinForm                                        |   | 0.081     | 0.212       | 34.0          |
|                                                | 5 |           | 0.070       | -1.0          |



| 14-Membered Ring ( 6)    | C(1)       | → | C(2)       | → | C(3)       | → | C(4)       | → | C(5)       | → | C(6)        | → | C(7)        | → | C(8)       | → |
|--------------------------|------------|---|------------|---|------------|---|------------|---|------------|---|-------------|---|-------------|---|------------|---|
|                          | sp2        |   | sp2        |   | sp2        |   | sp2        |   | sp2        |   | sp2         |   | sp2         |   | sp2        |   |
| Dev. (Ang)               | 0.116(2)   |   | 0.0457(19) |   | 0.059(2)   |   | 0.010(2)   |   | -0.098(2)  |   | -0.1489(19) |   | -0.0340(19) |   | 0.1474(18) |   |
| Cs(I)-Asym-Par (Deg)     | 130.39(9)  |   | 188.04(11) |   | 209.35(12) |   | 160.16(11) |   | 208.60(10) |   | 160.57(13)  |   | 228.18(11)  |   | 130.39(9)  |   |
| C2(I)-Asym-Par (Deg)     | 229.64(9)  |   | 185.41(11) |   | 160.96(13) |   | 209.96(10) |   | 161.93(11) |   | 209.65(12)  |   | 132.93(13)  |   | 229.64(9)  |   |
| Ring Bond Angle(Deg)     | 118.07(15) |   | 118.43(16) |   | 120.04(18) |   | 119.45(19) |   | 121.52(18) |   | 119.07(17)  |   | 120.58(16)  |   | 117.89(14) |   |
| Tors(I-J) (Deg)          | 176.33(17) |   | 179.30(19) |   | 2.2(3)     |   | -0.5(3)    |   | -2.6(3)    |   | -169.67(17) |   | -172.07(17) |   | 173.18(17) |   |
| Cs(I-J)-Asym-Par (Deg)   | 174.24(11) |   | 173.50(14) |   | 246.32(12) |   | 144.64(10) |   | 202.19(12) |   | 173.51(14)  |   | 103.99(14)  |   | 174.24(11) |   |
| C2(I-J)-Asym-Par (Deg)   | 175.04(12) |   | 174.10(14) |   | 143.79(14) |   | 245.84(10) |   | 201.18(12) |   | 176.01(14)  |   | 225.34(11)  |   | 175.04(12) |   |
| Ring Bond Distance (Ang) | 1.494(3)   |   | 1.393(3)   |   | 1.386(3)   |   | 1.384(3)   |   | 1.396(3)   |   | 1.404(3)    |   | 1.500(2)    |   | 1.492(3)   |   |

(Continued) C(9) → C(10) → C(11) → C(12) → C(13) → C(14) →

|                          |             |  |            |  |            |  |            |  |             |  |             |  |     |  |     |  |
|--------------------------|-------------|--|------------|--|------------|--|------------|--|-------------|--|-------------|--|-----|--|-----|--|
|                          | sp2         |  | sp2        |  | sp2        |  | sp2        |  | sp2         |  | sp2         |  | sp2 |  | sp2 |  |
| Dev. (Ang)               | 0.0820(18)  |  | 0.1018(19) |  | -0.062(2)  |  | -0.153(2)  |  | -0.083(2)   |  | 0.017(2)    |  |     |  |     |  |
| Cs(I)-Asym-Par (Deg)     | 188.04(11)  |  | 209.35(12) |  | 160.16(11) |  | 208.60(10) |  | 160.57(13)  |  | 228.18(11)  |  |     |  |     |  |
| C2(I)-Asym-Par (Deg)     | 185.41(11)  |  | 160.96(13) |  | 209.96(10) |  | 161.93(11) |  | 209.65(12)  |  | 132.93(13)  |  |     |  |     |  |
| Ring Bond Angle(Deg)     | 120.08(15)  |  | 119.42(16) |  | 120.59(17) |  | 120.21(18) |  | 119.85(17)  |  | 118.84(16)  |  |     |  |     |  |
| Tors(I-J) (Deg)          | -175.18(17) |  | -4.3(3)    |  | 0.0(3)     |  | 3.0(3)     |  | -178.96(18) |  | -172.31(17) |  |     |  |     |  |
| Cs(I-J)-Asym-Par (Deg)   | 173.50(14)  |  | 246.32(12) |  | 144.64(10) |  | 202.19(12) |  | 173.51(14)  |  | 103.99(14)  |  |     |  |     |  |
| C2(I-J)-Asym-Par (Deg)   | 174.10(14)  |  | 143.79(14) |  | 245.84(10) |  | 201.18(12) |  | 176.01(14)  |  | 225.34(11)  |  |     |  |     |  |
| Ring Bond Distance (Ang) | 1.401(2)    |  | 1.395(3)   |  | 1.390(3)   |  | 1.380(3)   |  | 1.396(3)    |  | 1.488(3)    |  |     |  |     |  |

Weighted Average Ring Bond Distance = 1.4258( 7,133) Ang. - NOTE: 1st esd. Internal, 2nd esd External.

Weighted Average Abs. Torsion Angl. = 139.92( 5,999) Deg. see: e.g. Domenicano et al., Acta Cryst. (1975), B31, 221-234.

Cremer & Pople Puckering Parameters [D. Cremer & J.A. Pople, J. Amer. Chem. Soc., 97, (1975), 1354-1358]

|        |                 |          |               |
|--------|-----------------|----------|---------------|
| Q(2) = | 0.322(2) Ang.   | Phi(2) = | 316.9(3) Deg  |
| Q(3) = | 0.090(2) Ang.   | Phi(3) = | 104.4(12) Deg |
| Q(4) = | 0.082(2) Ang.   | Phi(4) = | 58.4(14) Deg  |
| Q(5) = | 0.0369(19) Ang. | Phi(5) = | 252(3) Deg    |
| Q(6) = | 0.0731(19) Ang. | Phi(6) = | 15.1(16) Deg  |
| Q(7) = | -0.011(2) Ang.  |          |               |

Total Puckering Amplitude Q = 0.3539(19) Ang.

Conformational Analysis (G.G. Evans & J.A. Boeyens, Acta Cryst. (1989), B45, 581-590)

| Coefficients of Primitive and Normalised Forms |   |           |             |               |
|------------------------------------------------|---|-----------|-------------|---------------|
|                                                | M | Primitive | Coefficient | Angular Value |
| CosForm                                        | 2 | 0.114     | 0.185       | 48.0          |
| SinForm                                        |   | 0.209     | 0.339       | 50.0          |
| CosForm                                        | 3 | 0.080     | 0.129       | 16.0          |
| SinForm                                        |   | 0.011     | 0.018       | 18.0          |
| CosForm                                        | 4 | 0.038     | 0.061       | 8.0           |
| SinForm                                        |   | 0.045     | 0.072       | 10.0          |
| CosForm                                        | 5 | 0.022     | 0.036       | 40.0          |
| SinForm                                        |   | 0.015     | 0.024       | 38.0          |
| CosForm                                        | 6 | 0.013     | 0.021       | 4.0           |
| SinForm                                        |   | 0.061     | 0.098       | 2.0           |
|                                                | 7 |           | 0.017       | -1.0          |

=====

Analysis of Short Ring-Interactions with Cg-Cg Distances < 6.0 Angstrom and Beta < 60.0Deg.

=====

- Cg(I) = Plane number I (= ring number in () above)
- Alpha = Dihedral Angle between Planes I and J (Deg)
- Beta = Angle Cg(I)-->Cg(J) or Cg(I)-->Me vector and normal to plane I (Deg)
- Gamma = Angle Cg(I)-->Cg(J) vector and normal to plane J (Deg)
- Cg-Cg = Distance between ring Centroids (Ang.)
- CgI\_Perp = Perpendicular distance of Cg(I) on ring J (Ang.)
- CgJ\_Perp = Perpendicular distance of Cg(J) on ring I (Ang.)
- Slippage = Distance between Cg(I) and Perpendicular Projection of Cg(J) on Ring I (Ang.).
- P,Q,R,S = J-Plane Parameters for Carth. Coord. (Xo, Yo, Zo)

| Cg(I) | Res(I)  | Cg(J) | [ | ARU(J)]    | Cg-Cg Transformed J-Plane P, Q, R, S |               |               |         | Alpha    | Beta | Gamma | CgI_Perp   | CgJ_Perp   | Slippage |  |
|-------|---------|-------|---|------------|--------------------------------------|---------------|---------------|---------|----------|------|-------|------------|------------|----------|--|
| Cg(1) | [ 1] -> | Cg(1) | [ | 1455.01]   | 5.0147(12)                           | 0.7165        | 0.5631-0.4117 | -0.8900 | 0.00(9)  | 44.2 | 44.2  | 3.5932(8)  | -3.5931(8) | 3.498    |  |
| Cg(1) | [ 1] -> | Cg(1) | [ | 1655.01]   | 5.0147(12)                           | 0.7165        | 0.5631-0.4117 | 6.2963  | 0.00(9)  | 44.2 | 44.2  | -3.5931(8) | 3.5932(8)  | 3.498    |  |
| Cg(1) | [ 1] -> | Cg(2) | [ | 1455.01]   | 3.9249(12)                           | 0.7363        | 0.5851-0.3399 | 0.0355  | 4.45(9)  | 22.0 | 18.2  | 3.7289(8)  | -3.6403(8) |          |  |
| Cg(1) | [ 1] -> | Cg(3) | [ | 1655.01]   | 3.7591(11)                           | 0.6457        | 0.6009-0.4711 | 5.4384  | 5.72(9)  | 22.5 | 27.9  | -3.3208(8) | 3.4721(8)  |          |  |
| Cg(2) | [ 1] -> | Cg(1) | [ | 1655.01]   | 3.9250(12)                           | 0.7165        | 0.5631-0.4117 | 6.2963  | 4.45(9)  | 18.2 | 22.0  | -3.6404(8) | 3.7290(8)  |          |  |
| Cg(2) | [ 1] -> | Cg(2) | [ | 1455.01]   | 5.0147(12)                           | 0.7363        | 0.5851-0.3399 | 0.0355  | 0.00(9)  | 42.6 | 42.6  | 3.6925(8)  | -3.6925(8) | 3.393    |  |
| Cg(2) | [ 1] -> | Cg(2) | [ | 1655.01]   | 5.0148(12)                           | 0.7363        | 0.5851-0.3399 | 7.4205  | 0.00(9)  | 42.6 | 42.6  | -3.6925(8) | 3.6925(8)  | 3.393    |  |
| Cg(2) | [ 1] -> | Cg(2) | [ | 3456.01]   | 5.3322(11)                           | 0.7363-0.5851 | 0.3399        | 5.0603  | 85.16(9) | 19.4 | 75.5  | -1.3368(8) | -5.0293(8) |          |  |
| Cg(2) | [ 1] -> | Cg(3) | [ | 1655.01]   | 4.0900(11)                           | 0.6457        | 0.6009-0.4711 | 5.4384  | 9.19(9)  | 28.5 | 29.2  | -3.5693(8) | 3.5949(8)  |          |  |
| Cg(3) | [ 1] -> | Cg(1) | [ | 1455.01]   | 3.7590(11)                           | 0.7165        | 0.5631-0.4117 | -0.8900 | 5.72(9)  | 27.9 | 22.5  | 3.4720(8)  | -3.3207(8) |          |  |
| Cg(3) | [ 1] -> | Cg(2) | [ | 1455.01]   | 4.0899(11)                           | 0.7363        | 0.5851-0.3399 | 0.0355  | 9.19(9)  | 29.2 | 28.5  | 3.5948(8)  | -3.5693(8) |          |  |
| Cg(3) | [ 1] -> | Cg(3) | [ | 1455.01]   | 5.0147(12)                           | 0.6457        | 0.6009-0.4711 | -1.0380 | 0.00(9)  | 49.8 | 49.8  | 3.2382(8)  | -3.2382(8) | 3.829    |  |
| Cg(3) | [ 1] -> | Cg(3) | [ | 1655.01]   | 5.0147(12)                           | 0.6457        | 0.6009-0.4711 | 5.4384  | 0.00(9)  | 49.8 | 49.8  | -3.2383(8) | 3.2383(8)  | 3.829    |  |
|       |         |       |   | -----      |                                      |               |               |         | -----    |      |       |            |            |          |  |
|       |         |       |   | Min or Max | 3.759                                |               |               |         |          | 0.0  | 18.2  | 75.5       | -3.693     | -5.029   |  |

[ 1455] = -1+X, Y, Z

[ 1655] = 1+X, Y, Z

[ 3456] = -1/2+X, 1/2-Y, 1-Z

Analysis of Y-X...Cg(Pi-Ring) Interactions (X...Cg < 4.0 Ang. - Gamma < 30.0 Deg)

| Y--X(I) | Res(I) | Cg(J)         | [ ARU(J)]  | X...Cg     | Transformed J-Plane P, Q, R, S | X-Perp Gamma | Y-X...Cg  | Y...Cg   | Y-X, Pi |
|---------|--------|---------------|------------|------------|--------------------------------|--------------|-----------|----------|---------|
| C(8)    | -0(2)  | [ 1] -> Cg(3) | [ 1655.01] | 3.5830(16) | 0.6457 0.6009-0.4711 5.4384    | -3.180 27.45 | 76.17(11) | 3.498(2) | 7.00    |
|         |        |               |            | -----      |                                | -----        |           |          |         |
|         |        |               |            | Min or Max | 3.583                          | -3.180 27.4  | 76.17     | 3.498    | 7.00    |

[ 1655] = 1+X,Y,Z

The Cg(I) refer to the Ring Centre-of-Gravity numbers given in () in the Ring-Analysis above

| Cg(I) | x           | y          | z          | Xo        | Yo         | Zo         |
|-------|-------------|------------|------------|-----------|------------|------------|
| Cg(1) | 0.69218(16) | 0.45847(4) | 0.44001(3) | 3.4711(8) | 8.5675(7)  | 11.1923(7) |
| Cg(2) | 1.00902(17) | 0.35716(4) | 0.45143(3) | 5.0599(9) | 6.6744(7)  | 11.4829(8) |
| Cg(3) | 0.35035(16) | 0.55380(4) | 0.43008(3) | 1.7569(8) | 10.3489(7) | 10.9398(7) |

Analysis of Short Intra- and Inter-molecular Contacts ,  $d(I-J) < R(I) + R(J) + \text{Tolr}$ , With Tolr = 0.2 Ang.  $(X - I \dots J) > 100$ . Deg.

Contact Radii : C H N O S  
(Angstrom) 1.70 1.20 1.55 1.52 1.80

Default Contact Radii are those given by A.Bondi, J.Phys.Chem. (1964), 68, 441. (or Coval. Rad. + 0.8 Ang. when not given)

\* WARNING \* : no Far-Reaching Conclusions should be drawn based on the Default Radii Assigned to Metals

Short "INTRA" Distances between two Atoms that are Separated by less than 4 Bonds are NOT Listed (Except for Potential D/A Contacts)

| At(I) [1555.01] | At(J)      | [ ARU(J) ] | D(I-J)       | SumRad | Del   | Type  | X(I)   | Y(I)   | Z(I)   | X(J)    | Y(J)   | Z(J)   | X     | X - I...J  |
|-----------------|------------|------------|--------------|--------|-------|-------|--------|--------|--------|---------|--------|--------|-------|------------|
| S(1)            | .... O(5)  | [ 1455.01] | 3.4332(16)   | 3.32   | 0.11  |       | 0.7261 | 0.4551 | 0.7425 | 0.2260  | 0.3381 | 0.7092 | H(1)  | 172        |
| S(1)            | .... O(5)  | [ ]        | 3.4321(16)   | 3.32   | 0.11  | Intra | 0.7261 | 0.4551 | 0.7425 | 1.2260  | 0.3381 | 0.7092 |       |            |
| S(1)            | .... C(18) | [ ]        | 3.104(2)<<   | 3.50   | -0.40 | Intra | 0.7261 | 0.4551 | 0.7425 | 1.0102  | 0.3353 | 0.6792 | H(1)  | 100        |
| S(1)            | .... H(11) | [ ]        | 3.03         | 3.00   | 0.03  | Intra | 0.7261 | 0.4551 | 0.7425 | 1.1285  | 0.4370 | 0.6548 |       |            |
| S(1)            | .... H(20) | [ ]        | 3.11         | 3.00   | 0.11  | Intra | 0.7261 | 0.4551 | 0.7425 | 0.3137  | 0.5752 | 0.7657 | C(17) | 105        |
| S(2)            | .... O(8)  | [ ]        | 3.4342(14)   | 3.32   | 0.11  | Intra | 0.1101 | 0.7609 | 0.6200 | 0.3970  | 0.6461 | 0.7090 | H(2)  | 120        |
| S(2)            | .... N(2)  | [ ]        | 3.3273(16) < | 3.35   | -0.02 | Intra | 0.1101 | 0.7609 | 0.6200 | 0.3927  | 0.6148 | 0.5702 |       |            |
| S(2)            | .... C(22) | [ 1455.01] | 3.354(2) <   | 3.50   | -0.15 |       | 0.1101 | 0.7609 | 0.6200 | -0.5484 | 0.7297 | 0.6181 | C(22) | 151.08(7)  |
| S(2)            | .... C(23) | [ ]        | 3.1302(18)<< | 3.50   | -0.37 | Intra | 0.1101 | 0.7609 | 0.6200 | 0.3275  | 0.6158 | 0.6640 |       |            |
| S(2)            | .... H(17) | [ 1455.01] | 3.19         | 3.00   | 0.19  |       | 0.1101 | 0.7609 | 0.6200 | -0.3263 | 0.6368 | 0.6237 | C(22) | 115        |
| S(2)            | .... H(18) | [ 1455.01] | 3.01         | 3.00   | 0.01  |       | 0.1101 | 0.7609 | 0.6200 | -0.4621 | 0.7485 | 0.5860 | C(22) | 151        |
| S(2)            | .... H(19) | [ 1455.01] | 2.92 <       | 3.00   | -0.08 |       | 0.1101 | 0.7609 | 0.6200 | -0.4520 | 0.7496 | 0.6488 | C(22) | 154        |
| S(2)            | .... C(11) | [ 3466.01] | 3.556(2)     | 3.50   | 0.06  |       | 0.1101 | 0.7609 | 0.6200 | -0.2843 | 0.8873 | 0.5502 | C(22) | 136.67(7)  |
| S(2)            | .... H(9)  | [ 3566.01] | 3.19         | 3.00   | 0.19  |       | 0.1101 | 0.7609 | 0.6200 | 0.4930  | 0.8971 | 0.6168 | H(2)  | 117        |
| S(2)            | .... H(14) | [ 4656.01] | 3.09         | 3.00   | 0.09  |       | 0.1101 | 0.7609 | 0.6200 | -0.1457 | 0.7737 | 0.7302 | C(22) | 116        |
|                 |            |            |              |        |       |       |        |        |        |         |        |        | H(2)  | 132        |
| O(1)            | .... C(3)  | [ ]        | 2.782(3)<<   | 3.22   | -0.44 | Intra | 0.5950 | 0.4146 | 0.3417 | 0.9540  | 0.3342 | 0.4005 |       |            |
| O(1)            | .... C(13) | [ ]        | 2.807(3)<<   | 3.22   | -0.41 | Intra | 0.5950 | 0.4146 | 0.3417 | 0.2758  | 0.5254 | 0.3816 |       |            |
| O(1)            | .... H(5)  | [ ]        | 2.48<<       | 2.72   | -0.24 | Intra | 0.5950 | 0.4146 | 0.3417 | 0.9134  | 0.3183 | 0.3659 |       |            |
| O(1)            | .... H(10) | [ ]        | 2.52<<       | 2.72   | -0.20 | Intra | 0.5950 | 0.4146 | 0.3417 | 0.2289  | 0.5068 | 0.3480 |       |            |
| O(1)            | .... C(24) | [ 2564.01] | 2.889(3)<<   | 3.22   | -0.33 |       | 0.5950 | 0.4146 | 0.3417 | 0.2498  | 0.3774 | 0.2549 | C(1)  | 151.47(17) |
| O(1)            | .... H(20) | [ 2564.01] | 2.82         | 2.72   | 0.10  |       | 0.5950 | 0.4146 | 0.3417 | 0.1862  | 0.4248 | 0.2657 | C(1)  | 137        |
| O(1)            | .... H(21) | [ 2564.01] | 2.62 <       | 2.72   | -0.10 |       | 0.5950 | 0.4146 | 0.3417 | 0.4403  | 0.3800 | 0.2465 | C(1)  | 171        |
| O(1)            | .... H(22) | [ 2564.01] | 2.73         | 2.72   | 0.01  |       | 0.5950 | 0.4146 | 0.3417 | 0.2222  | 0.3433 | 0.2837 | C(1)  | 138        |
| O(2)            | .... O(6)  | [ ]        | 2.9539(18) < | 3.04   | -0.09 | Intra | 0.8653 | 0.5171 | 0.5299 | 0.7103  | 0.6690 | 0.5207 | C(8)  | 104.90(11) |
| O(2)            | .... N(1)  | [ ]        | 2.8719(19) < | 3.07   | -0.20 | Intra | 0.8653 | 0.5171 | 0.5299 | 0.9272  | 0.3918 | 0.5941 |       |            |
| O(2)            | .... N(2)  | [ ]        | 3.162(2)     | 3.07   | 0.09  | Intra | 0.8653 | 0.5171 | 0.5299 | 0.3927  | 0.6148 | 0.5702 | C(8)  | 103.59(12) |
| O(2)            | .... C(6)  | [ ]        | 2.844(2)<<   | 3.22   | -0.38 | Intra | 0.8653 | 0.5171 | 0.5299 | 1.0606  | 0.3789 | 0.5033 |       |            |
| O(2)            | .... C(10) | [ ]        | 2.845(2)<<   | 3.22   | -0.38 | Intra | 0.8653 | 0.5171 | 0.5299 | 0.4304  | 0.5844 | 0.4778 |       |            |
| O(2)            | .... C(10) | [ 1655.01] | 3.372(2)     | 3.22   | 0.15  |       | 0.8653 | 0.5171 | 0.5299 | 1.4304  | 0.5844 | 0.4778 |       |            |
| O(2)            | .... C(11) | [ 1655.01] | 3.231(2)     | 3.22   | 0.01  |       | 0.8653 | 0.5171 | 0.5299 | 1.2157  | 0.6127 | 0.4498 |       |            |
| O(2)            | .... C(15) | [ ]        | 2.749(2)<<   | 3.22   | -0.47 | Intra | 0.8653 | 0.5171 | 0.5299 | 1.1287  | 0.3946 | 0.5597 |       |            |
| O(2)            | .... C(20) | [ ]        | 2.648(2)<<   | 3.22   | -0.57 | Intra | 0.8653 | 0.5171 | 0.5299 | 0.5274  | 0.6258 | 0.5251 |       |            |

|      |      |       |   |          |   |            |      |      |       |        |        |        |        |         |        |        |       |            |
|------|------|-------|---|----------|---|------------|------|------|-------|--------|--------|--------|--------|---------|--------|--------|-------|------------|
| 0(2) | .... | H(3)  | [ |          | ] | 2.92       | 2.72 | 0.20 | Intra | 0.8653 | 0.5171 | 0.5299 | 0.7661 | 0.3812  | 0.5828 |        |       |            |
| 0(2) | .... | H(4)  | [ | 1655.01] |   | 2.55       | <    | 2.72 | -0.17 |        | 0.8653 | 0.5171 | 0.5299 | 1.2507  | 0.5871 | 0.5702 | C(8)  | 147        |
| 0(3) | .... | N(1)  | [ | 1655.01] |   | 2.890(2)   | <    | 3.07 | -0.18 |        | 1.3628 | 0.4027 | 0.5726 | 1.9272  | 0.3917 | 0.5941 | C(15) | 167.90(15) |
| 0(3) | .... | C(5)  | [ |          | ] | 2.918(3)   | <<   | 3.22 | -0.30 | Intra  | 1.3628 | 0.4027 | 0.5726 | 1.1909  | 0.3199 | 0.4814 |       |            |
| 0(3) | .... | C(8)  | [ | 1655.01] |   | 3.339(2)   |      | 3.22 | 0.12  |        | 1.3628 | 0.4027 | 0.5726 | 1.7736  | 0.4884 | 0.4907 | C(15) | 118.77(13) |
| 0(3) | .... | C(16) | [ |          | ] | 2.795(2)   | <<   | 3.22 | -0.42 | Intra  | 1.3628 | 0.4027 | 0.5726 | 0.9681  | 0.4058 | 0.6501 |       |            |
| 0(3) | .... | C(17) | [ | 1655.01] |   | 3.198(2)   | <    | 3.22 | -0.02 |        | 1.3628 | 0.4027 | 0.5726 | 1.7230  | 0.4439 | 0.6719 | C(15) | 141.36(13) |
| 0(3) | .... | H(3)  | [ | 1655.01] |   | 2.08       | <<   | 2.72 | -0.64 |        | 1.3628 | 0.4027 | 0.5726 | 1.7661  | 0.3812 | 0.5828 | C(15) | 160        |
| 0(3) | .... | H(7)  | [ |          | ] | 2.71       | <    | 2.72 | -0.01 | Intra  | 1.3628 | 0.4027 | 0.5726 | 1.3175  | 0.2945 | 0.5020 |       |            |
| 0(3) | .... | H(11) | [ |          | ] | 2.48       | <<   | 2.72 | -0.24 | Intra  | 1.3628 | 0.4027 | 0.5726 | 1.1285  | 0.4370 | 0.6548 |       |            |
| 0(3) | .... | H(12) | [ | 1655.01] |   | 2.49       | <<   | 2.72 | -0.23 |        | 1.3628 | 0.4027 | 0.5726 | 1.5621  | 0.4163 | 0.6619 | C(15) | 130        |
| 0(4) | .... | N(1)  | [ |          | ] | 2.901(2)   | <    | 3.07 | -0.17 | Intra  | 0.8638 | 0.2846 | 0.6757 | 0.9272  | 0.3918 | 0.5941 |       |            |
| 0(4) | .... | C(17) | [ |          | ] | 3.060(2)   | <    | 3.22 | -0.16 | Intra  | 0.8638 | 0.2846 | 0.6757 | 0.7230  | 0.4439 | 0.6719 |       |            |
| 0(4) | .... | C(19) | [ | 1455.01] |   | 3.389(3)   |      | 3.22 | 0.17  |        | 0.8638 | 0.2846 | 0.6757 | 0.2760  | 0.2756 | 0.7412 | C(18) | 122.31(14) |
| 0(4) | .... | C(19) | [ |          | ] | 2.659(3)   | <<   | 3.22 | -0.56 | Intra  | 0.8638 | 0.2846 | 0.6757 | 1.2760  | 0.2756 | 0.7412 |       |            |
| 0(4) | .... | H(12) | [ |          | ] | 2.91       |      | 2.72 | 0.19  | Intra  | 0.8638 | 0.2846 | 0.6757 | 0.5621  | 0.4163 | 0.6619 |       |            |
| 0(4) | .... | H(14) | [ |          | ] | 2.79       |      | 2.72 | 0.07  | Intra  | 0.8638 | 0.2846 | 0.6757 | 1.1457  | 0.2737 | 0.7698 |       |            |
| 0(4) | .... | H(15) | [ | 1455.01] |   | 2.89       |      | 2.72 | 0.17  |        | 0.8638 | 0.2846 | 0.6757 | 0.4564  | 0.2784 | 0.7559 | C(18) | 114        |
| 0(4) | .... | H(16) | [ |          | ] | 2.48       | <<   | 2.72 | -0.24 | Intra  | 0.8638 | 0.2846 | 0.6757 | 1.2600  | 0.2325 | 0.7195 |       |            |
| 0(4) | .... | C(4)  | [ | 3456.01] |   | 3.306(3)   |      | 3.22 | 0.09  |        | 0.8638 | 0.2846 | 0.6757 | 0.6399  | 0.2024 | 0.5695 | C(18) | 129.36(13) |
| 0(4) | .... | H(6)  | [ | 3456.01] |   | 2.56       | <    | 2.72 | -0.16 |        | 0.8638 | 0.2846 | 0.6757 | 0.7316  | 0.2425 | 0.5837 | C(18) | 118        |
| 0(4) | .... | H(22) | [ | 4646.01] |   | 2.70       | <    | 2.72 | -0.02 |        | 0.8638 | 0.2846 | 0.6757 | 0.7222  | 0.1567 | 0.7163 | C(18) | 146        |
| 0(5) | .... | S(1)  | [ |          | ] | 3.4321(16) |      | 3.32 | 0.11  | Intra  | 1.2260 | 0.3381 | 0.7092 | 0.7261  | 0.4551 | 0.7425 | C(19) | 120.12(13) |
| 0(5) | .... | S(1)  | [ | 1655.01] |   | 3.4332(16) |      | 3.32 | 0.11  |        | 1.2260 | 0.3381 | 0.7092 | 1.7262  | 0.4551 | 0.7425 | C(18) | 139.88(12) |
|      |      |       |   |          |   |            |      |      |       |        |        |        |        |         |        |        | C(19) | 104.38(12) |
| 0(5) | .... | C(17) | [ |          | ] | 3.342(2)   |      | 3.22 | 0.12  | Intra  | 1.2260 | 0.3381 | 0.7092 | 0.7230  | 0.4439 | 0.6719 | C(19) | 140.23(13) |
| 0(5) | .... | C(17) | [ | 1655.01] |   | 3.319(2)   |      | 3.22 | 0.10  |        | 1.2260 | 0.3381 | 0.7092 | 1.7230  | 0.4439 | 0.6719 | C(18) | 118.23(12) |
|      |      |       |   |          |   |            |      |      |       |        |        |        |        |         |        |        | C(19) | 120.78(13) |
| 0(5) | .... | H(11) | [ |          | ] | 2.36       | <<   | 2.72 | -0.36 | Intra  | 1.2260 | 0.3381 | 0.7092 | 1.1285  | 0.4370 | 0.6548 | C(19) | 177        |
| 0(5) | .... | H(12) | [ | 1655.01] |   | 2.53       | <    | 2.72 | -0.19 |        | 1.2260 | 0.3381 | 0.7092 | 1.5621  | 0.4163 | 0.6619 | C(18) | 107        |
|      |      |       |   |          |   |            |      |      |       |        |        |        |        |         |        |        | C(19) | 128        |
| 0(6) | .... | O(2)  | [ |          | ] | 2.9539(18) | <    | 3.04 | -0.09 | Intra  | 0.7103 | 0.6690 | 0.5207 | 0.8653  | 0.5171 | 0.5299 |       |            |
| 0(6) | .... | C(9)  | [ |          | ] | 3.242(2)   |      | 3.22 | 0.02  | Intra  | 0.7103 | 0.6690 | 0.5207 | 0.5579  | 0.5227 | 0.4591 |       |            |
| 0(6) | .... | C(11) | [ |          | ] | 3.242(2)   |      | 3.22 | 0.02  | Intra  | 0.7103 | 0.6690 | 0.5207 | 0.2157  | 0.6127 | 0.4498 |       |            |
| 0(6) | .... | C(11) | [ | 1655.01] |   | 3.284(2)   |      | 3.22 | 0.06  |        | 0.7103 | 0.6690 | 0.5207 | 1.2157  | 0.6127 | 0.4498 | C(20) | 114.58(12) |
| 0(6) | .... | C(21) | [ |          | ] | 2.773(2)   | <<   | 3.22 | -0.45 | Intra  | 0.7103 | 0.6690 | 0.5207 | 0.4806  | 0.6483 | 0.6187 |       |            |
| 0(6) | .... | C(22) | [ |          | ] | 3.018(2)   | <<   | 3.22 | -0.20 | Intra  | 0.7103 | 0.6690 | 0.5207 | 0.4516  | 0.7297 | 0.6181 |       |            |
| 0(6) | .... | H(2)  | [ | 1655.01] |   | 2.64       | <    | 2.72 | -0.08 |        | 0.7103 | 0.6690 | 0.5207 | 1.0355  | 0.7408 | 0.5827 | C(20) | 138        |
| 0(6) | .... | H(8)  | [ | 1655.01] |   | 2.54       | <    | 2.72 | -0.18 |        | 0.7103 | 0.6690 | 0.5207 | 1.1208  | 0.6525 | 0.4636 | C(20) | 125        |
| 0(6) | .... | H(17) | [ |          | ] | 2.69       | <    | 2.72 | -0.03 | Intra  | 0.7103 | 0.6690 | 0.5207 | 0.6737  | 0.6368 | 0.6237 |       |            |
| 0(6) | .... | H(18) | [ |          | ] | 2.39       | <<   | 2.72 | -0.33 | Intra  | 0.7103 | 0.6690 | 0.5207 | 0.5379  | 0.7485 | 0.5860 |       |            |
| 0(7) | .... | N(2)  | [ |          | ] | 2.687(2)   | <<   | 3.07 | -0.38 | Intra  | 0.1614 | 0.5693 | 0.6594 | 0.3927  | 0.6148 | 0.5702 |       |            |
| 0(7) | .... | C(16) | [ | 1455.01] |   | 3.214(2)   | <    | 3.22 | -0.01 |        | 0.1614 | 0.5693 | 0.6594 | -0.0319 | 0.4058 | 0.6501 | C(23) | 153.86(13) |
| 0(7) | .... | C(17) | [ | 1455.01] |   | 3.229(2)   |      | 3.22 | 0.01  |        | 0.1614 | 0.5693 | 0.6594 | -0.2770 | 0.4439 | 0.6719 | C(23) | 168.75(12) |
| 0(7) | .... | C(24) | [ |          | ] | 2.664(2)   | <<   | 3.22 | -0.56 | Intra  | 0.1614 | 0.5693 | 0.6594 | 0.2502  | 0.6226 | 0.7549 |       |            |
| 0(7) | .... | H(4)  | [ |          | ] | 2.34       | <<   | 2.72 | -0.38 | Intra  | 0.1614 | 0.5693 | 0.6594 | 0.2507  | 0.5871 | 0.5702 |       |            |
| 0(7) | .... | H(11) | [ | 1455.01] |   | 2.48       | <<   | 2.72 | -0.24 |        | 0.1614 | 0.5693 | 0.6594 | 0.1285  | 0.4370 | 0.6548 | C(23) | 140        |
| 0(7) | .... | H(13) | [ | 1455.01] |   | 2.69       | <    | 2.72 | -0.03 |        | 0.1614 | 0.5693 | 0.6594 | -0.2907 | 0.4916 | 0.6552 | C(23) | 166        |

|      |      |       |            |              |      |       |       |        |        |        |         |        |        |       |            |
|------|------|-------|------------|--------------|------|-------|-------|--------|--------|--------|---------|--------|--------|-------|------------|
| O(7) | .... | H(17) | [ 1455.01] | 2.90         | 2.72 | 0.18  |       | 0.1614 | 0.5693 | 0.6594 | -0.3263 | 0.6368 | 0.6237 | C(23) | 107        |
| O(7) | .... | H(20) | [ ]        | 2.81         | 2.72 | 0.09  | Intra | 0.1614 | 0.5693 | 0.6594 | 0.3137  | 0.5752 | 0.7657 |       |            |
| O(7) | .... | H(21) | [ ]        | 2.46<<       | 2.72 | -0.26 | Intra | 0.1614 | 0.5693 | 0.6594 | 0.0597  | 0.6200 | 0.7465 |       |            |
| O(8) | .... | S(2)  | [ ]        | 3.4342(14)   | 3.32 | 0.11  | Intra | 0.3970 | 0.6461 | 0.7090 | 0.1101  | 0.7609 | 0.6200 | C(24) | 120.54(13) |
| O(8) | .... | C(22) | [ ]        | 2.802(2)<<   | 3.22 | -0.42 | Intra | 0.3970 | 0.6461 | 0.7090 | 0.4516  | 0.7297 | 0.6181 | C(24) | 152.06(14) |
| O(8) | .... | H(17) | [ ]        | 2.58 <       | 2.72 | -0.14 | Intra | 0.3970 | 0.6461 | 0.7090 | 0.6737  | 0.6368 | 0.6237 | C(24) | 158        |
| O(8) | .... | H(19) | [ ]        | 2.58 <       | 2.72 | -0.14 | Intra | 0.3970 | 0.6461 | 0.7090 | 0.5480  | 0.7496 | 0.6488 | C(24) | 149        |
| O(8) | .... | C(19) | [ 4756.01] | 3.187(3) <   | 3.22 | -0.03 |       | 0.3970 | 0.6461 | 0.7090 | 0.7240  | 0.7756 | 0.7588 | C(23) | 143.63(12) |
| O(8) | .... | H(15) | [ 4756.01] | 2.73         | 2.72 | 0.01  |       | 0.3970 | 0.6461 | 0.7090 | 0.5436  | 0.7784 | 0.7441 | C(23) | 138        |
| N(1) | .... | O(2)  | [ ]        | 2.8719(19) < | 3.07 | -0.20 | Intra | 0.9272 | 0.3918 | 0.5941 | 0.8653  | 0.5171 | 0.5299 | C(16) | 115.00(10) |
| N(1) | .... | O(3)  | [ 1455.01] | 2.890(2) <   | 3.07 | -0.18 |       | 0.9272 | 0.3918 | 0.5941 | 0.3628  | 0.4027 | 0.5726 | C(15) | 127.73(12) |
|      |      |       |            |              |      |       |       |        |        |        |         |        |        | C(16) | 108.01(11) |
| N(1) | .... | O(4)  | [ ]        | 2.901(2) <   | 3.07 | -0.17 | Intra | 0.9272 | 0.3918 | 0.5941 | 0.8638  | 0.2846 | 0.6757 | C(15) | 125.35(12) |
| N(1) | .... | C(5)  | [ ]        | 3.431(3)     | 3.25 | 0.18  | Intra | 0.9272 | 0.3918 | 0.5941 | 1.1909  | 0.3199 | 0.4814 | C(16) | 146.08(12) |
| N(1) | .... | C(7)  | [ ]        | 3.154(2) <   | 3.25 | -0.10 | Intra | 0.9272 | 0.3918 | 0.5941 | 0.8819  | 0.4181 | 0.4720 | C(16) | 160.26(11) |
| N(1) | .... | C(8)  | [ ]        | 3.283(2)     | 3.25 | 0.03  | Intra | 0.9272 | 0.3918 | 0.5941 | 0.7736  | 0.4884 | 0.4907 | C(16) | 135.58(11) |
| N(1) | .... | H(12) | [ ]        | 2.56 <       | 2.75 | -0.19 | Intra | 0.9272 | 0.3918 | 0.5941 | 0.5621  | 0.4163 | 0.6619 | C(15) | 167        |
| N(1) | .... | H(13) | [ ]        | 2.66 <       | 2.75 | -0.09 | Intra | 0.9272 | 0.3918 | 0.5941 | 0.7093  | 0.4916 | 0.6552 | C(15) | 132        |
| N(2) | .... | S(2)  | [ ]        | 3.3273(16) < | 3.35 | -0.02 | Intra | 0.3927 | 0.6148 | 0.5702 | 0.1101  | 0.7609 | 0.6200 | C(20) | 114.37(11) |
| N(2) | .... | O(2)  | [ ]        | 3.162(2)     | 3.07 | 0.09  | Intra | 0.3927 | 0.6148 | 0.5702 | 0.8653  | 0.5171 | 0.5299 | C(21) | 107.27(11) |
|      |      |       |            |              |      |       |       |        |        |        |         |        |        | H(4)  | 106        |
| N(2) | .... | O(7)  | [ ]        | 2.687(2)<<   | 3.07 | -0.38 | Intra | 0.3927 | 0.6148 | 0.5702 | 0.1614  | 0.5693 | 0.6594 | C(20) | 169.79(12) |
| N(2) | .... | C(9)  | [ ]        | 3.409(2)     | 3.25 | 0.16  | Intra | 0.3927 | 0.6148 | 0.5702 | 0.5579  | 0.5227 | 0.4591 | C(21) | 147.98(12) |
| N(2) | .... | C(11) | [ ]        | 3.188(2) <   | 3.25 | -0.06 | Intra | 0.3927 | 0.6148 | 0.5702 | 0.2157  | 0.6127 | 0.4498 | C(21) | 154.87(11) |
| N(2) | .... | H(18) | [ ]        | 2.63 <       | 2.75 | -0.12 | Intra | 0.3927 | 0.6148 | 0.5702 | 0.5379  | 0.7485 | 0.5860 | H(4)  | 141        |
| C(1) | .... | C(8)  | [ ]        | 2.925(2)<<   | 3.40 | -0.48 | Intra | 0.6300 | 0.4329 | 0.3870 | 0.7736  | 0.4884 | 0.4907 | O(1)  | 172.25(16) |
| C(1) | .... | H(5)  | [ ]        | 2.63<<       | 2.90 | -0.27 | Intra | 0.6300 | 0.4329 | 0.3870 | 0.9134  | 0.3183 | 0.3659 | C(14) | 168        |
| C(1) | .... | H(10) | [ ]        | 2.63<<       | 2.90 | -0.27 | Intra | 0.6300 | 0.4329 | 0.3870 | 0.2289  | 0.5068 | 0.3480 | C(2)  | 167        |
| C(2) | .... | C(5)  | [ ]        | 2.765(3)<<   | 3.40 | -0.63 | Intra | 0.8268 | 0.3944 | 0.4209 | 1.1909  | 0.3199 | 0.4814 | C(1)  | 178.33(13) |
| C(2) | .... | C(9)  | [ ]        | 2.919(2)<<   | 3.40 | -0.48 | Intra | 0.8268 | 0.3944 | 0.4209 | 0.5579  | 0.5227 | 0.4591 | C(3)  | 177.56(14) |
| C(2) | .... | C(13) | [ 1655.01] | 3.474(3)     | 3.40 | 0.07  |       | 0.8268 | 0.3944 | 0.4209 | 1.2758  | 0.5254 | 0.3816 |       |            |
| C(3) | .... | O(1)  | [ ]        | 2.782(3)<<   | 3.22 | -0.44 | Intra | 0.9540 | 0.3342 | 0.4005 | 0.5950  | 0.4146 | 0.3417 | C(4)  | 176.85(15) |
| C(3) | .... | C(6)  | [ ]        | 2.796(3)<<   | 3.40 | -0.60 | Intra | 0.9540 | 0.3342 | 0.4005 | 1.0606  | 0.3789 | 0.5033 | H(5)  | 178        |
| C(4) | .... | C(7)  | [ ]        | 2.803(3)<<   | 3.40 | -0.60 | Intra | 1.1399 | 0.2976 | 0.4305 | 0.8819  | 0.4181 | 0.4720 | H(6)  | 178        |
| C(4) | .... | O(4)  | [ 3556.01] | 3.306(3)     | 3.22 | 0.09  |       | 1.1399 | 0.2976 | 0.4305 | 1.3638  | 0.2154 | 0.3243 | C(5)  | 147.37(16) |
| C(4) | .... | H(7)  | [ 3456.01] | 2.92         | 2.90 | 0.02  |       | 1.1399 | 0.2976 | 0.4305 | 0.8175  | 0.2055 | 0.4980 | C(3)  | 104        |
| C(5) | .... | O(3)  | [ ]        | 2.918(3)<<   | 3.22 | -0.30 | Intra | 1.1909 | 0.3199 | 0.4814 | 1.3628  | 0.4027 | 0.5726 | C(4)  | 163.27(15) |
| C(5) | .... | N(1)  | [ ]        | 3.431(3)     | 3.25 | 0.18  | Intra | 1.1909 | 0.3199 | 0.4814 | 0.9272  | 0.3918 | 0.5941 | C(4)  | 145.93(15) |
| C(5) | .... | C(2)  | [ ]        | 2.765(3)<<   | 3.40 | -0.63 | Intra | 1.1909 | 0.3199 | 0.4814 | 0.8268  | 0.3944 | 0.4209 | H(7)  | 179        |
| C(5) | .... | H(7)  | [ 3456.01] | 2.87 <       | 2.90 | -0.03 |       | 1.1909 | 0.3199 | 0.4814 | 0.8175  | 0.2055 | 0.4980 | C(6)  | 103        |
| C(6) | .... | O(2)  | [ ]        | 2.844(2)<<   | 3.22 | -0.38 | Intra | 1.0606 | 0.3789 | 0.5033 | 0.8653  | 0.5171 | 0.5299 | C(5)  | 166.60(14) |
| C(6) | .... | C(3)  | [ ]        | 2.796(3)<<   | 3.40 | -0.60 | Intra | 1.0606 | 0.3789 | 0.5033 | 0.9540  | 0.3342 | 0.4005 | C(15) | 173.62(13) |
| C(6) | .... | H(3)  | [ ]        | 2.51<<       | 2.90 | -0.39 | Intra | 1.0606 | 0.3789 | 0.5033 | 0.7661  | 0.3812 | 0.5828 | C(5)  | 128        |
| C(7) | .... | N(1)  | [ ]        | 3.154(2) <   | 3.25 | -0.10 | Intra | 0.8819 | 0.4181 | 0.4720 | 0.9272  | 0.3918 | 0.5941 | C(2)  | 151.51(12) |
| C(7) | .... | C(4)  | [ ]        | 2.803(3)<<   | 3.40 | -0.60 | Intra | 0.8819 | 0.4181 | 0.4720 | 1.1399  | 0.2976 | 0.4305 | C(8)  | 172.16(14) |
| C(7) | .... | C(14) | [ ]        | 2.916(3)<<   | 3.40 | -0.48 | Intra | 0.8819 | 0.4181 | 0.4720 | 0.4829  | 0.4943 | 0.4103 | C(6)  | 176.31(14) |
| C(7) | .... | H(3)  | [ ]        | 2.96         | 2.90 | 0.06  | Intra | 0.8819 | 0.4181 | 0.4720 | 0.7661  | 0.3812 | 0.5828 | C(2)  | 140        |
| C(8) | .... | O(3)  | [ 1455.01] | 3.339(2)     | 3.22 | 0.12  |       | 0.7736 | 0.4884 | 0.4907 | 0.3628  | 0.4027 | 0.5726 |       |            |

|       |      |       |   |          |            |      |       |       |        |        |        |         |         |        |        |            |            |
|-------|------|-------|---|----------|------------|------|-------|-------|--------|--------|--------|---------|---------|--------|--------|------------|------------|
| C(8)  | .... | N(1)  | [ | ]        | 3.283(2)   | 3.25 | 0.03  | Intra | 0.7736 | 0.4884 | 0.4907 | 0.9272  | 0.3918  | 0.5941 | C(9)   | 146.94(12) |            |
| C(8)  | .... | C(1)  | [ | ]        | 2.925(2)<< | 3.40 | -0.48 | Intra | 0.7736 | 0.4884 | 0.4907 | 0.6300  | 0.4329  | 0.3870 | O(2)   | 169.87(14) |            |
| C(8)  | .... | C(11) | [ | 1655.01] | 3.375(3)   | <    | 3.40  | -0.03 |        | 0.7736 | 0.4884 | 0.4907  | 1.2157  | 0.6127 | 0.4498 | C(7)       | 105.51(12) |
| C(8)  | .... | C(12) | [ | 1655.01] | 3.406(3)   | 3.40 | 0.01  |       | 0.7736 | 0.4884 | 0.4907 | 1.1394  | 0.5832  | 0.4019 |        |            |            |
| C(8)  | .... | C(15) | [ | ]        | 3.053(3)<< | 3.40 | -0.35 | Intra | 0.7736 | 0.4884 | 0.4907 | 1.1287  | 0.3946  | 0.5597 | C(9)   | 168.19(13) |            |
| C(8)  | .... | C(20) | [ | ]        | 2.979(2)<< | 3.40 | -0.42 | Intra | 0.7736 | 0.4884 | 0.4907 | 0.5274  | 0.6258  | 0.5251 | C(7)   | 176.60(14) |            |
| C(8)  | .... | H(3)  | [ | ]        | 3.08       | 2.90 | 0.18  | Intra | 0.7736 | 0.4884 | 0.4907 | 0.7661  | 0.3812  | 0.5828 | C(9)   | 133        |            |
| C(9)  | .... | O(6)  | [ | ]        | 3.242(2)   | 3.22 | 0.02  | Intra | 0.5579 | 0.5227 | 0.4591 | 0.7103  | 0.6690  | 0.5207 | C(14)  | 144.10(12) |            |
| C(9)  | .... | N(2)  | [ | ]        | 3.409(2)   | 3.25 | 0.16  | Intra | 0.5579 | 0.5227 | 0.4591 | 0.3927  | 0.6148  | 0.5702 | C(14)  | 149.29(14) |            |
| C(9)  | .... | C(2)  | [ | ]        | 2.919(2)<< | 3.40 | -0.48 | Intra | 0.5579 | 0.5227 | 0.4591 | 0.8268  | 0.3944  | 0.4209 | C(10)  | 179.52(13) |            |
| C(9)  | .... | C(12) | [ | ]        | 2.793(3)<< | 3.40 | -0.61 | Intra | 0.5579 | 0.5227 | 0.4591 | 0.1394  | 0.5832  | 0.4019 | C(8)   | 177.68(13) |            |
| C(9)  | .... | C(12) | [ | 1655.01] | 3.449(3)   | 3.40 | 0.05  |       | 0.5579 | 0.5227 | 0.4591 | 1.1394  | 0.5832  | 0.4019 | C(10)  | 105.04(12) |            |
| C(10) | .... | O(2)  | [ | 1455.01] | 3.372(2)   | 3.22 | 0.15  |       | 0.4304 | 0.5844 | 0.4778 | -0.1347 | 0.5171  | 0.5299 | C(9)   | 102.13(12) |            |
| C(10) | .... | O(2)  | [ | ]        | 2.845(2)<< | 3.22 | -0.38 | Intra | 0.4304 | 0.5844 | 0.4778 | 0.8653  | 0.5171  | 0.5299 | C(11)  | 175.59(13) |            |
| C(10) | .... | C(13) | [ | ]        | 2.795(3)<< | 3.40 | -0.61 | Intra | 0.4304 | 0.5844 | 0.4778 | 0.2758  | 0.5254  | 0.3816 | C(20)  | 171.47(13) |            |
| C(10) | .... | H(4)  | [ | ]        | 2.52<<     | 2.90 | -0.38 | Intra | 0.4304 | 0.5844 | 0.4778 | 0.2507  | 0.5871  | 0.5702 | C(9)   | 120        |            |
|       |      |       |   |          |            |      |       |       |        |        |        |         |         |        | C(11)  | 101        |            |
| C(11) | .... | O(2)  | [ | 1455.01] | 3.231(2)   | 3.22 | 0.01  |       | 0.2157 | 0.6127 | 0.4498 | -0.1347 | 0.5171  | 0.5299 | C(12)  | 100.56(12) |            |
| C(11) | .... | O(6)  | [ | 1455.01] | 3.284(2)   | 3.22 | 0.06  |       | 0.2157 | 0.6127 | 0.4498 | -0.2897 | 0.6690  | 0.5207 | C(10)  | 115.91(12) |            |
|       |      |       |   |          |            |      |       |       |        |        |        |         |         |        | C(12)  | 113.30(13) |            |
| C(11) | .... | O(6)  | [ | ]        | 3.242(2)   | 3.22 | 0.02  | Intra | 0.2157 | 0.6127 | 0.4498 | 0.7103  | 0.6690  | 0.5207 | C(12)  | 145.72(14) |            |
| C(11) | .... | N(2)  | [ | ]        | 3.188(2)   | <    | 3.25  | -0.06 | Intra  | 0.2157 | 0.6127 | 0.4498  | 0.3927  | 0.6148 | 0.5702 | C(12)      | 157.29(14) |
| C(11) | .... | C(8)  | [ | 1455.01] | 3.375(3)   | <    | 3.40  | -0.03 |        | 0.2157 | 0.6127 | 0.4498  | -0.2264 | 0.4884 | 0.4907 |            |            |
| C(11) | .... | C(14) | [ | ]        | 2.775(3)<< | 3.40 | -0.63 | Intra | 0.2157 | 0.6127 | 0.4498 | 0.4829  | 0.4943  | 0.4103 | H(8)   | 179        |            |
| C(11) | .... | S(2)  | [ | 3566.01] | 3.556(2)   | 3.50 | 0.06  |       | 0.2157 | 0.6127 | 0.4498 | 0.6101  | 0.7391  | 0.3800 |        |            |            |
| C(11) | .... | H(18) | [ | 3466.01] | 2.89       | <    | 2.90  | -0.01 |        | 0.2157 | 0.6127 | 0.4498  | 0.0379  | 0.7515 | 0.4140 | C(10)      | 138        |
| C(12) | .... | C(8)  | [ | 1455.01] | 3.406(3)   | 3.40 | 0.01  |       | 0.1394 | 0.5832 | 0.4019 | -0.2264 | 0.4884  | 0.4907 |        |            |            |
| C(12) | .... | C(9)  | [ | 1455.01] | 3.449(3)   | 3.40 | 0.05  |       | 0.1394 | 0.5832 | 0.4019 | -0.4421 | 0.5227  | 0.4591 | C(13)  | 108.72(13) |            |
| C(12) | .... | C(9)  | [ | ]        | 2.793(3)<< | 3.40 | -0.61 | Intra | 0.1394 | 0.5832 | 0.4019 | 0.5579  | 0.5227  | 0.4591 | H(9)   | 178        |            |
| C(13) | .... | O(1)  | [ | ]        | 2.807(3)<< | 3.22 | -0.41 | Intra | 0.2758 | 0.5254 | 0.3816 | 0.5950  | 0.4146  | 0.3417 | C(12)  | 174.93(15) |            |
| C(13) | .... | C(2)  | [ | 1455.01] | 3.474(3)   | 3.40 | 0.07  |       | 0.2758 | 0.5254 | 0.3816 | -0.1732 | 0.3944  | 0.4209 |        |            |            |
| C(13) | .... | C(10) | [ | ]        | 2.795(3)<< | 3.40 | -0.61 | Intra | 0.2758 | 0.5254 | 0.3816 | 0.4304  | 0.5844  | 0.4778 | H(10)  | 177        |            |
| C(14) | .... | C(7)  | [ | ]        | 2.916(3)<< | 3.40 | -0.48 | Intra | 0.4829 | 0.4943 | 0.4103 | 0.8819  | 0.4181  | 0.4720 | C(13)  | 174.60(14) |            |
| C(14) | .... | C(11) | [ | ]        | 2.775(3)<< | 3.40 | -0.63 | Intra | 0.4829 | 0.4943 | 0.4103 | 0.2157  | 0.6127  | 0.4498 | C(1)   | 177.46(13) |            |
| C(15) | .... | O(2)  | [ | ]        | 2.749(2)<< | 3.22 | -0.47 | Intra | 1.1287 | 0.3946 | 0.5597 | 0.8653  | 0.5171  | 0.5299 | O(3)   | 115.48(14) |            |
| C(15) | .... | C(8)  | [ | ]        | 3.053(3)<< | 3.40 | -0.35 | Intra | 1.1287 | 0.3946 | 0.5597 | 0.7736  | 0.4884  | 0.4907 | O(3)   | 129.83(14) |            |
| C(15) | .... | C(18) | [ | ]        | 3.291(3)   | <    | 3.40  | -0.11 | Intra  | 1.1287 | 0.3946 | 0.5597  | 1.0102  | 0.3353 | 0.6792 | C(6)       | 140.81(12) |
| C(15) | .... | H(7)  | [ | ]        | 2.56<<     | 2.90 | -0.34 | Intra | 1.1287 | 0.3946 | 0.5597 | 1.3175  | 0.2945  | 0.5020 | N(1)   | 129        |            |
| C(15) | .... | H(11) | [ | ]        | 2.55<<     | 2.90 | -0.35 | Intra | 1.1287 | 0.3946 | 0.5597 | 1.1285  | 0.4370  | 0.6548 | C(6)   | 165        |            |
| C(16) | .... | O(3)  | [ | ]        | 2.795(2)<< | 3.22 | -0.42 | Intra | 0.9681 | 0.4058 | 0.6501 | 1.3628  | 0.4027  | 0.5726 | C(17)  | 146.81(12) |            |
|       |      |       |   |          |            |      |       |       |        |        |        |         |         |        | C(18)  | 103.07(12) |            |
| C(16) | .... | O(7)  | [ | 1655.01] | 3.214(2)   | <    | 3.22  | -0.01 |        | 0.9681 | 0.4058 | 0.6501  | 1.1614  | 0.5693 | 0.6594 | N(1)       | 106.53(10) |
|       |      |       |   |          |            |      |       |       |        |        |        |         |         |        | C(18)  | 138.04(12) |            |
| C(16) | .... | H(1)  | [ | ]        | 2.97       | 2.90 | 0.07  | Intra | 0.9681 | 0.4058 | 0.6501 | 0.8819  | 0.4911  | 0.7471 | N(1)   | 152        |            |
| C(16) | .... | H(12) | [ | 1655.01] | 3.00       | 2.90 | 0.10  |       | 0.9681 | 0.4058 | 0.6501 | 1.5621  | 0.4163  | 0.6619 | N(1)   | 104        |            |
|       |      |       |   |          |            |      |       |       |        |        |        |         |         |        | C(17)  | 137        |            |
| C(17) | .... | O(3)  | [ | 1455.01] | 3.198(2)   | <    | 3.22  | -0.02 |        | 0.7230 | 0.4439 | 0.6719  | 0.3628  | 0.4027 | 0.5726 | S(1)       | 144.76(10) |
| C(17) | .... | O(4)  | [ | ]        | 3.060(2)   | <    | 3.22  | -0.16 | Intra  | 0.7230 | 0.4439 | 0.6719  | 0.8638  | 0.2846 | 0.6757 | H(13)      | 155        |



|       |      |       |            |              |      |       |       |        |        |        |         |        |        |       |            |
|-------|------|-------|------------|--------------|------|-------|-------|--------|--------|--------|---------|--------|--------|-------|------------|
| C(17) | .... | O(5)  | [ 1455.01] | 3.319(2)     | 3.22 | 0.10  |       | 0.7230 | 0.4439 | 0.6719 | 0.2260  | 0.3381 | 0.7092 | C(16) | 115.55(11) |
|       |      |       |            |              |      |       |       |        |        |        |         |        |        | H(13) | 127        |
| C(17) | .... | O(5)  | [ ]        | 3.342(2)     | 3.22 | 0.12  | Intra | 0.7230 | 0.4439 | 0.6719 | 1.2260  | 0.3381 | 0.7092 | H(12) | 112        |
|       |      |       |            |              |      |       |       |        |        |        |         |        |        | H(13) | 135        |
| C(17) | .... | O(7)  | [ 1655.01] | 3.229(2)     | 3.22 | 0.01  |       | 0.7230 | 0.4439 | 0.6719 | 1.1614  | 0.5693 | 0.6594 | H(12) | 155        |
| C(17) | .... | H(3)  | [ ]        | 2.56<<       | 2.90 | -0.34 | Intra | 0.7230 | 0.4439 | 0.6719 | 0.7661  | 0.3812 | 0.5828 | S(1)  | 159        |
| C(17) | .... | H(11) | [ 1455.01] | 3.02         | 2.90 | 0.12  |       | 0.7230 | 0.4439 | 0.6719 | 0.1285  | 0.4370 | 0.6548 | C(16) | 136        |
| C(18) | .... | S(1)  | [ ]        | 3.104(2)<<   | 3.50 | -0.40 | Intra | 1.0102 | 0.3353 | 0.6792 | 0.7261  | 0.4551 | 0.7425 | O(4)  | 109.03(14) |
| C(18) | .... | C(15) | [ ]        | 3.291(3) <   | 3.40 | -0.11 | Intra | 1.0102 | 0.3353 | 0.6792 | 1.1287  | 0.3946 | 0.5597 | O(4)  | 107.91(13) |
|       |      |       |            |              |      |       |       |        |        |        |         |        |        | O(5)  | 111.74(12) |
| C(18) | .... | H(3)  | [ ]        | 2.87 <       | 2.90 | -0.03 | Intra | 1.0102 | 0.3353 | 0.6792 | 0.7661  | 0.3812 | 0.5828 | O(5)  | 146        |
| C(18) | .... | H(12) | [ ]        | 2.75 <       | 2.90 | -0.15 | Intra | 1.0102 | 0.3353 | 0.6792 | 0.5621  | 0.4163 | 0.6619 | O(5)  | 138        |
| C(18) | .... | H(14) | [ ]        | 2.66<<       | 2.90 | -0.24 | Intra | 1.0102 | 0.3353 | 0.6792 | 1.1457  | 0.2737 | 0.7698 | C(16) | 146        |
| C(18) | .... | H(16) | [ ]        | 2.51<<       | 2.90 | -0.39 | Intra | 1.0102 | 0.3353 | 0.6792 | 1.2600  | 0.2325 | 0.7195 | C(16) | 158        |
| C(19) | .... | O(4)  | [ ]        | 2.659(3)<<   | 3.22 | -0.56 | Intra | 1.2760 | 0.2756 | 0.7412 | 0.8638  | 0.2846 | 0.6757 | H(15) | 162        |
| C(19) | .... | O(4)  | [ 1655.01] | 3.389(3)     | 3.22 | 0.17  |       | 1.2760 | 0.2756 | 0.7412 | 1.8638  | 0.2846 | 0.6757 | H(14) | 161        |
| C(19) | .... | O(8)  | [ 4746.01] | 3.187(3) <   | 3.22 | -0.03 |       | 1.2760 | 0.2756 | 0.7412 | 1.6030  | 0.1461 | 0.7910 | O(5)  | 157.98(16) |
| C(19) | .... | H(19) | [ 4746.01] | 2.98         | 2.90 | 0.08  |       | 1.2760 | 0.2756 | 0.7412 | 1.4520  | 0.2496 | 0.8512 | O(5)  | 136        |
|       |      |       |            |              |      |       |       |        |        |        |         |        |        | H(16) | 115        |
| C(20) | .... | O(2)  | [ ]        | 2.648(2)<<   | 3.22 | -0.57 | Intra | 0.5274 | 0.6258 | 0.5251 | 0.8653  | 0.5171 | 0.5299 |       |            |
| C(20) | .... | C(8)  | [ ]        | 2.979(2)<<   | 3.40 | -0.42 | Intra | 0.5274 | 0.6258 | 0.5251 | 0.7736  | 0.4884 | 0.4907 | O(6)  | 103.34(13) |
|       |      |       |            |              |      |       |       |        |        |        |         |        |        | N(2)  | 109.06(11) |
| C(20) | .... | C(22) | [ ]        | 3.084(3)<<   | 3.40 | -0.32 | Intra | 0.5274 | 0.6258 | 0.5251 | 0.4516  | 0.7297 | 0.6181 | C(10) | 153.32(14) |
| C(20) | .... | H(8)  | [ ]        | 2.62<<       | 2.90 | -0.28 | Intra | 0.5274 | 0.6258 | 0.5251 | 0.1208  | 0.6525 | 0.4636 | O(6)  | 114        |
| C(20) | .... | H(17) | [ ]        | 2.62<<       | 2.90 | -0.28 | Intra | 0.5274 | 0.6258 | 0.5251 | 0.6737  | 0.6368 | 0.6237 | C(10) | 153        |
| C(20) | .... | H(18) | [ ]        | 2.77 <       | 2.90 | -0.13 | Intra | 0.5274 | 0.6258 | 0.5251 | 0.5379  | 0.7485 | 0.5860 | C(10) | 151        |
| C(21) | .... | O(6)  | [ ]        | 2.773(2)<<   | 3.22 | -0.45 | Intra | 0.4806 | 0.6483 | 0.6187 | 0.7103  | 0.6690 | 0.5207 | C(23) | 162.19(12) |
| C(21) | .... | H(2)  | [ ]        | 2.97         | 2.90 | 0.07  | Intra | 0.4806 | 0.6483 | 0.6187 | 0.0355  | 0.7408 | 0.5827 | H(17) | 153        |
| C(22) | .... | S(2)  | [ 1655.01] | 3.354(2) <   | 3.50 | -0.15 |       | 0.4516 | 0.7297 | 0.6181 | 1.1101  | 0.7609 | 0.6200 | S(2)  | 151.08(8)  |
| C(22) | .... | O(6)  | [ ]        | 3.018(2)<<   | 3.22 | -0.20 | Intra | 0.4516 | 0.7297 | 0.6181 | 0.7103  | 0.6690 | 0.5207 | S(2)  | 123.31(10) |
|       |      |       |            |              |      |       |       |        |        |        |         |        |        | H(19) | 125        |
| C(22) | .... | O(8)  | [ ]        | 2.802(2)<<   | 3.22 | -0.42 | Intra | 0.4516 | 0.7297 | 0.6181 | 0.3970  | 0.6461 | 0.7090 | H(18) | 157        |
| C(22) | .... | C(20) | [ ]        | 3.084(3)<<   | 3.40 | -0.32 | Intra | 0.4516 | 0.7297 | 0.6181 | 0.5274  | 0.6258 | 0.5251 | S(2)  | 109.86(9)  |
|       |      |       |            |              |      |       |       |        |        |        |         |        |        | H(19) | 141        |
| C(22) | .... | H(2)  | [ 1655.01] | 3.07         | 2.90 | 0.17  |       | 0.4516 | 0.7297 | 0.6181 | 1.0355  | 0.7408 | 0.5827 | S(2)  | 153        |
| C(22) | .... | H(4)  | [ ]        | 3.10         | 2.90 | 0.20  | Intra | 0.4516 | 0.7297 | 0.6181 | 0.2507  | 0.5871 | 0.5702 | H(19) | 142        |
| C(23) | .... | S(2)  | [ ]        | 3.1302(18)<< | 3.50 | -0.37 | Intra | 0.3275 | 0.6158 | 0.6640 | 0.1101  | 0.7609 | 0.6200 | O(7)  | 110.32(13) |
| C(23) | .... | H(4)  | [ ]        | 2.48<<       | 2.90 | -0.42 | Intra | 0.3275 | 0.6158 | 0.6640 | 0.2507  | 0.5871 | 0.5702 | O(8)  | 165        |
| C(23) | .... | H(13) | [ ]        | 3.02         | 2.90 | 0.12  | Intra | 0.3275 | 0.6158 | 0.6640 | 0.7093  | 0.4916 | 0.6552 | O(8)  | 103        |
| C(23) | .... | H(19) | [ ]        | 2.76 <       | 2.90 | -0.14 | Intra | 0.3275 | 0.6158 | 0.6640 | 0.5480  | 0.7496 | 0.6488 | O(7)  | 156        |
| C(23) | .... | H(20) | [ ]        | 2.70<<       | 2.90 | -0.20 | Intra | 0.3275 | 0.6158 | 0.6640 | 0.3137  | 0.5752 | 0.7657 | C(21) | 149        |
| C(23) | .... | H(21) | [ ]        | 2.49<<       | 2.90 | -0.41 | Intra | 0.3275 | 0.6158 | 0.6640 | 0.0597  | 0.6200 | 0.7465 | C(21) | 154        |
| C(24) | .... | O(7)  | [ ]        | 2.664(2)<<   | 3.22 | -0.56 | Intra | 0.2502 | 0.6226 | 0.7549 | 0.1614  | 0.5693 | 0.6594 | H(22) | 161        |
| C(24) | .... | H(1)  | [ 1455.01] | 3.08         | 2.90 | 0.18  |       | 0.2502 | 0.6226 | 0.7549 | -0.1181 | 0.4911 | 0.7471 | O(8)  | 120        |
|       |      |       |            |              |      |       |       |        |        |        |         |        |        | H(22) | 131        |
| C(24) | .... | O(1)  | [ 2565.01] | 2.889(3)<<   | 3.22 | -0.33 |       | 0.2502 | 0.6226 | 0.7549 | -0.0950 | 0.5854 | 0.8417 | O(8)  | 173.19(17) |
| H(1)  | .... | C(16) | [ ]        | 2.97         | 2.90 | 0.07  | Intra | 0.8819 | 0.4911 | 0.7471 | 0.9681  | 0.4058 | 0.6501 |       |            |
| H(1)  | .... | C(24) | [ 1655.01] | 3.08         | 2.90 | 0.18  |       | 0.8819 | 0.4911 | 0.7471 | 1.2502  | 0.6226 | 0.7549 | S(1)  | 167        |

|       |      |       |   |          |   |        |        |       |       |         |        |        |         |        |        |       |     |
|-------|------|-------|---|----------|---|--------|--------|-------|-------|---------|--------|--------|---------|--------|--------|-------|-----|
| H(1)  | .... | H(13) | [ |          | ] | 2.49   | 2.40   | 0.09  | Intra | 0.8819  | 0.4911 | 0.7471 | 0.7093  | 0.4916 | 0.6552 |       |     |
| H(1)  | .... | H(21) | [ | 1655.01] |   | 2.57   | 2.40   | 0.17  |       | 0.8819  | 0.4911 | 0.7471 | 1.0597  | 0.6200 | 0.7465 | S(1)  | 150 |
| H(2)  | .... | O(6)  | [ | 1455.01] |   | 2.64   | < 2.72 | -0.08 |       | 0.0355  | 0.7408 | 0.5827 | -0.2897 | 0.6690 | 0.5207 | S(2)  | 156 |
| H(2)  | .... | C(21) | [ |          | ] | 2.97   | 2.90   | 0.07  | Intra | 0.0355  | 0.7408 | 0.5827 | 0.4806  | 0.6483 | 0.6187 |       |     |
| H(2)  | .... | C(22) | [ | 1455.01] |   | 3.07   | 2.90   | 0.17  |       | 0.0355  | 0.7408 | 0.5827 | -0.5484 | 0.7297 | 0.6181 |       |     |
| H(2)  | .... | H(18) | [ | 1455.01] |   | 2.50   | 2.40   | 0.10  |       | 0.0355  | 0.7408 | 0.5827 | -0.4621 | 0.7485 | 0.5860 | S(2)  | 107 |
| H(2)  | .... | H(18) | [ |          | ] | 2.52   | 2.40   | 0.12  | Intra | 0.0355  | 0.7408 | 0.5827 | 0.5379  | 0.7485 | 0.5860 |       |     |
| H(3)  | .... | O(2)  | [ |          | ] | 2.92   | 2.72   | 0.20  | Intra | 0.7661  | 0.3812 | 0.5828 | 0.8653  | 0.5171 | 0.5299 |       |     |
| H(3)  | .... | O(3)  | [ | 1455.01] |   | 2.08<< | 2.72   | -0.64 |       | 0.7661  | 0.3812 | 0.5828 | 0.3628  | 0.4027 | 0.5726 | N(1)  | 153 |
| H(3)  | .... | C(6)  | [ |          | ] | 2.51<< | 2.90   | -0.39 | Intra | 0.7661  | 0.3812 | 0.5828 | 1.0606  | 0.3789 | 0.5033 |       |     |
| H(3)  | .... | C(7)  | [ |          | ] | 2.96   | 2.90   | 0.06  | Intra | 0.7661  | 0.3812 | 0.5828 | 0.8819  | 0.4181 | 0.4720 |       |     |
| H(3)  | .... | C(8)  | [ |          | ] | 3.08   | 2.90   | 0.18  | Intra | 0.7661  | 0.3812 | 0.5828 | 0.7736  | 0.4884 | 0.4907 |       |     |
| H(3)  | .... | C(17) | [ |          | ] | 2.56<< | 2.90   | -0.34 | Intra | 0.7661  | 0.3812 | 0.5828 | 0.7230  | 0.4439 | 0.6719 |       |     |
| H(3)  | .... | C(18) | [ |          | ] | 2.87   | < 2.90 | -0.03 | Intra | 0.7661  | 0.3812 | 0.5828 | 1.0102  | 0.3353 | 0.6792 |       |     |
| H(3)  | .... | H(12) | [ |          | ] | 2.35   | < 2.40 | -0.05 | Intra | 0.7661  | 0.3812 | 0.5828 | 0.5621  | 0.4163 | 0.6619 |       |     |
| H(3)  | .... | H(6)  | [ | 3456.01] |   | 2.60   | 2.40   | 0.20  |       | 0.7661  | 0.3812 | 0.5828 | 0.7316  | 0.2425 | 0.5837 | N(1)  | 106 |
| H(4)  | .... | O(2)  | [ | 1455.01] |   | 2.55   | < 2.72 | -0.17 |       | 0.2507  | 0.5871 | 0.5702 | -0.1347 | 0.5171 | 0.5299 | N(2)  | 156 |
| H(4)  | .... | O(7)  | [ |          | ] | 2.34<< | 2.72   | -0.38 | Intra | 0.2507  | 0.5871 | 0.5702 | 0.1614  | 0.5693 | 0.6594 | N(2)  | 104 |
| H(4)  | .... | C(10) | [ |          | ] | 2.52<< | 2.90   | -0.38 | Intra | 0.2507  | 0.5871 | 0.5702 | 0.4304  | 0.5844 | 0.4778 |       |     |
| H(4)  | .... | C(22) | [ |          | ] | 3.10   | 2.90   | 0.20  | Intra | 0.2507  | 0.5871 | 0.5702 | 0.4516  | 0.7297 | 0.6181 |       |     |
| H(4)  | .... | C(23) | [ |          | ] | 2.48<< | 2.90   | -0.42 | Intra | 0.2507  | 0.5871 | 0.5702 | 0.3275  | 0.6158 | 0.6640 |       |     |
| H(5)  | .... | O(1)  | [ |          | ] | 2.48<< | 2.72   | -0.24 | Intra | 0.9134  | 0.3183 | 0.3659 | 0.5950  | 0.4146 | 0.3417 |       |     |
| H(5)  | .... | C(1)  | [ |          | ] | 2.63<< | 2.90   | -0.27 | Intra | 0.9134  | 0.3183 | 0.3659 | 0.6300  | 0.4329 | 0.3870 |       |     |
| H(5)  | .... | H(6)  | [ |          | ] | 2.34   | < 2.40 | -0.06 | Intra | 0.9134  | 0.3183 | 0.3659 | 1.2316  | 0.2575 | 0.4163 |       |     |
| H(5)  | .... | H(16) | [ | 3456.01] |   | 2.49   | 2.40   | 0.09  |       | 0.9134  | 0.3183 | 0.3659 | 0.7600  | 0.2675 | 0.2805 | C(3)  | 173 |
| H(6)  | .... | H(5)  | [ |          | ] | 2.34   | < 2.40 | -0.06 | Intra | 1.2316  | 0.2575 | 0.4163 | 0.9134  | 0.3183 | 0.3659 |       |     |
| H(6)  | .... | H(7)  | [ |          | ] | 2.33   | < 2.40 | -0.07 | Intra | 1.2316  | 0.2575 | 0.4163 | 1.3175  | 0.2945 | 0.5020 |       |     |
| H(6)  | .... | O(4)  | [ | 3556.01] |   | 2.56   | < 2.72 | -0.16 |       | 1.2316  | 0.2575 | 0.4163 | 1.3638  | 0.2154 | 0.3243 | C(4)  | 136 |
| H(6)  | .... | H(3)  | [ | 3556.01] |   | 2.60   | 2.40   | 0.20  |       | 1.2316  | 0.2575 | 0.4163 | 1.2661  | 0.1188 | 0.4172 | C(4)  | 145 |
| H(7)  | .... | O(3)  | [ |          | ] | 2.71   | < 2.72 | -0.01 | Intra | 1.3175  | 0.2945 | 0.5020 | 1.3628  | 0.4027 | 0.5726 |       |     |
| H(7)  | .... | C(15) | [ |          | ] | 2.56<< | 2.90   | -0.34 | Intra | 1.3175  | 0.2945 | 0.5020 | 1.1287  | 0.3946 | 0.5597 |       |     |
| H(7)  | .... | H(6)  | [ |          | ] | 2.33   | < 2.40 | -0.07 | Intra | 1.3175  | 0.2945 | 0.5020 | 1.2316  | 0.2575 | 0.4163 |       |     |
| H(7)  | .... | C(4)  | [ | 3556.01] |   | 2.92   | 2.90   | 0.02  |       | 1.3175  | 0.2945 | 0.5020 | 1.6399  | 0.2024 | 0.5695 | C(5)  | 171 |
| H(7)  | .... | C(5)  | [ | 3556.01] |   | 2.87   | < 2.90 | -0.03 |       | 1.3175  | 0.2945 | 0.5020 | 1.6909  | 0.1801 | 0.5186 | C(5)  | 153 |
| H(8)  | .... | O(6)  | [ | 1455.01] |   | 2.54   | < 2.72 | -0.18 |       | 0.1208  | 0.6525 | 0.4636 | -0.2897 | 0.6690 | 0.5207 | C(11) | 135 |
| H(8)  | .... | C(20) | [ |          | ] | 2.62<< | 2.90   | -0.28 | Intra | 0.1208  | 0.6525 | 0.4636 | 0.5274  | 0.6258 | 0.5251 |       |     |
| H(8)  | .... | H(9)  | [ |          | ] | 2.33   | < 2.40 | -0.07 | Intra | 0.1208  | 0.6525 | 0.4636 | -0.0070 | 0.6029 | 0.3832 |       |     |
| H(8)  | .... | H(18) | [ | 3466.01] |   | 2.28   | < 2.40 | -0.12 |       | 0.1208  | 0.6525 | 0.4636 | 0.0379  | 0.7515 | 0.4140 | C(11) | 122 |
| H(9)  | .... | H(8)  | [ |          | ] | 2.33   | < 2.40 | -0.07 | Intra | -0.0070 | 0.6029 | 0.3832 | 0.1208  | 0.6525 | 0.4636 |       |     |
| H(9)  | .... | H(10) | [ |          | ] | 2.33   | < 2.40 | -0.07 | Intra | -0.0070 | 0.6029 | 0.3832 | 0.2289  | 0.5068 | 0.3480 |       |     |
| H(9)  | .... | S(2)  | [ | 3466.01] |   | 3.19   | 3.00   | 0.19  |       | -0.0070 | 0.6029 | 0.3832 | -0.3899 | 0.7391 | 0.3800 | C(12) | 142 |
| H(10) | .... | O(1)  | [ |          | ] | 2.52<< | 2.72   | -0.20 | Intra | 0.2289  | 0.5068 | 0.3480 | 0.5950  | 0.4146 | 0.3417 |       |     |
| H(10) | .... | C(1)  | [ |          | ] | 2.63<< | 2.90   | -0.27 | Intra | 0.2289  | 0.5068 | 0.3480 | 0.6300  | 0.4329 | 0.3870 |       |     |
| H(10) | .... | H(9)  | [ |          | ] | 2.33   | < 2.40 | -0.07 | Intra | 0.2289  | 0.5068 | 0.3480 | -0.0070 | 0.6029 | 0.3832 |       |     |
| H(11) | .... | S(1)  | [ |          | ] | 3.03   | 3.00   | 0.03  | Intra | 1.1285  | 0.4370 | 0.6548 | 0.7261  | 0.4551 | 0.7425 |       |     |
| H(11) | .... | O(3)  | [ |          | ] | 2.48<< | 2.72   | -0.24 | Intra | 1.1285  | 0.4370 | 0.6548 | 1.3628  | 0.4027 | 0.5726 |       |     |
| H(11) | .... | O(5)  | [ |          | ] | 2.36<< | 2.72   | -0.36 | Intra | 1.1285  | 0.4370 | 0.6548 | 1.2260  | 0.3381 | 0.7092 |       |     |
| H(11) | .... | O(7)  | [ | 1655.01] |   | 2.48<< | 2.72   | -0.24 |       | 1.1285  | 0.4370 | 0.6548 | 1.1614  | 0.5693 | 0.6594 | C(16) | 130 |

|       |      |       |   |          |   |                         |                      |                       |       |     |
|-------|------|-------|---|----------|---|-------------------------|----------------------|-----------------------|-------|-----|
| H(11) | .... | C(15) | [ |          | ] | 2.55<< 2.90 -0.35 Intra | 1.1285 0.4370 0.6548 | 1.1287 0.3946 0.5597  |       |     |
| H(11) | .... | C(17) | [ | 1655.01] |   | 3.02 2.90 0.12          | 1.1285 0.4370 0.6548 | 1.7230 0.4439 0.6719  | C(16) | 147 |
| H(11) | .... | H(12) | [ | 1655.01] |   | 2.22 < 2.40 -0.18       | 1.1285 0.4370 0.6548 | 1.5621 0.4163 0.6619  | C(16) | 134 |
| H(11) | .... | H(13) | [ |          | ] | 2.34 < 2.40 -0.06 Intra | 1.1285 0.4370 0.6548 | 0.7093 0.4916 0.6552  |       |     |
| H(12) | .... | O(3)  | [ | 1455.01] |   | 2.49<< 2.72 -0.23       | 0.5621 0.4163 0.6619 | 0.3628 0.4027 0.5726  | C(17) | 128 |
| H(12) | .... | O(4)  | [ |          | ] | 2.91 2.72 0.19 Intra    | 0.5621 0.4163 0.6619 | 0.8638 0.2846 0.6757  |       |     |
| H(12) | .... | O(5)  | [ | 1455.01] |   | 2.53 < 2.72 -0.19       | 0.5621 0.4163 0.6619 | 0.2260 0.3381 0.7092  | C(17) | 136 |
| H(12) | .... | N(1)  | [ |          | ] | 2.56 < 2.75 -0.19 Intra | 0.5621 0.4163 0.6619 | 0.9272 0.3918 0.5941  |       |     |
| H(12) | .... | C(16) | [ | 1455.01] |   | 3.00 2.90 0.10          | 0.5621 0.4163 0.6619 | -0.0319 0.4058 0.6501 | C(17) | 150 |
| H(12) | .... | C(18) | [ |          | ] | 2.75 < 2.90 -0.15 Intra | 0.5621 0.4163 0.6619 | 1.0102 0.3353 0.6792  |       |     |
| H(12) | .... | H(3)  | [ |          | ] | 2.35 < 2.40 -0.05 Intra | 0.5621 0.4163 0.6619 | 0.7661 0.3812 0.5828  |       |     |
| H(12) | .... | H(11) | [ | 1455.01] |   | 2.22 < 2.40 -0.18       | 0.5621 0.4163 0.6619 | 0.1285 0.4370 0.6548  | C(17) | 137 |
| H(13) | .... | O(7)  | [ | 1655.01] |   | 2.69 < 2.72 -0.03       | 0.7093 0.4916 0.6552 | 1.1614 0.5693 0.6594  | C(17) | 114 |
| H(13) | .... | N(1)  | [ |          | ] | 2.66 < 2.75 -0.09 Intra | 0.7093 0.4916 0.6552 | 0.9272 0.3918 0.5941  |       |     |
| H(13) | .... | C(23) | [ |          | ] | 3.02 2.90 0.12 Intra    | 0.7093 0.4916 0.6552 | 0.3275 0.6158 0.6640  | C(17) | 135 |
| H(13) | .... | H(1)  | [ |          | ] | 2.49 2.40 0.09 Intra    | 0.7093 0.4916 0.6552 | 0.8819 0.4911 0.7471  |       |     |
| H(13) | .... | H(11) | [ |          | ] | 2.34 < 2.40 -0.06 Intra | 0.7093 0.4916 0.6552 | 1.1285 0.4370 0.6548  |       |     |
| H(14) | .... | O(4)  | [ |          | ] | 2.79 2.72 0.07 Intra    | 1.1457 0.2737 0.7698 | 0.8638 0.2846 0.6757  |       |     |
| H(14) | .... | C(18) | [ |          | ] | 2.66<< 2.90 -0.24 Intra | 1.1457 0.2737 0.7698 | 1.0102 0.3353 0.6792  |       |     |
| H(14) | .... | S(2)  | [ | 4646.01] |   | 3.09 3.00 0.09          | 1.1457 0.2737 0.7698 | 0.8899 0.2609 0.8800  | C(19) | 163 |
| H(15) | .... | O(4)  | [ | 1655.01] |   | 2.89 2.72 0.17          | 1.4564 0.2784 0.7559 | 1.8638 0.2846 0.6757  | C(19) | 113 |
| H(15) | .... | O(8)  | [ | 4746.01] |   | 2.73 2.72 0.01          | 1.4564 0.2784 0.7559 | 1.6030 0.1461 0.7910  | C(19) | 109 |
| H(15) | .... | H(19) | [ | 4746.01] |   | 2.48 2.40 0.08          | 1.4564 0.2784 0.7559 | 1.4520 0.2496 0.8512  | C(19) | 111 |
| H(16) | .... | O(4)  | [ |          | ] | 2.48<< 2.72 -0.24 Intra | 1.2600 0.2325 0.7195 | 0.8638 0.2846 0.6757  |       |     |
| H(16) | .... | C(18) | [ |          | ] | 2.51<< 2.90 -0.39 Intra | 1.2600 0.2325 0.7195 | 1.0102 0.3353 0.6792  |       |     |
| H(16) | .... | H(5)  | [ | 3556.01] |   | 2.49 2.40 0.09          | 1.2600 0.2325 0.7195 | 1.4134 0.1817 0.6341  | C(19) | 141 |
| H(17) | .... | S(2)  | [ | 1655.01] |   | 3.19 3.00 0.19          | 0.6737 0.6368 0.6237 | 1.1101 0.7609 0.6200  | C(21) | 120 |
| H(17) | .... | O(6)  | [ |          | ] | 2.69 < 2.72 -0.03 Intra | 0.6737 0.6368 0.6237 | 0.7103 0.6690 0.5207  |       |     |
| H(17) | .... | O(7)  | [ | 1655.01] |   | 2.90 2.72 0.18          | 0.6737 0.6368 0.6237 | 1.1614 0.5693 0.6594  | C(21) | 162 |
| H(17) | .... | O(8)  | [ |          | ] | 2.58 < 2.72 -0.14 Intra | 0.6737 0.6368 0.6237 | 0.3970 0.6461 0.7090  |       |     |
| H(17) | .... | C(20) | [ |          | ] | 2.62<< 2.90 -0.28 Intra | 0.6737 0.6368 0.6237 | 0.5274 0.6258 0.5251  |       |     |
| H(17) | .... | H(18) | [ |          | ] | 2.40 2.40 0.00 Intra    | 0.6737 0.6368 0.6237 | 0.5379 0.7485 0.5860  |       |     |
| H(17) | .... | H(19) | [ |          | ] | 2.29 < 2.40 -0.11 Intra | 0.6737 0.6368 0.6237 | 0.5480 0.7496 0.6488  |       |     |
| H(18) | .... | S(2)  | [ | 1655.01] |   | 3.01 3.00 0.01          | 0.5379 0.7485 0.5860 | 1.1101 0.7609 0.6200  | C(22) | 102 |
| H(18) | .... | O(6)  | [ |          | ] | 2.39<< 2.72 -0.33 Intra | 0.5379 0.7485 0.5860 | 0.7103 0.6690 0.5207  | C(22) | 121 |
| H(18) | .... | N(2)  | [ |          | ] | 2.63 < 2.75 -0.12 Intra | 0.5379 0.7485 0.5860 | 0.3927 0.6148 0.5702  |       |     |
| H(18) | .... | C(20) | [ |          | ] | 2.77 < 2.90 -0.13 Intra | 0.5379 0.7485 0.5860 | 0.5274 0.6258 0.5251  |       |     |
| H(18) | .... | H(2)  | [ |          | ] | 2.52 2.40 0.12 Intra    | 0.5379 0.7485 0.5860 | 0.0355 0.7408 0.5827  |       |     |
| H(18) | .... | H(2)  | [ | 1655.01] |   | 2.50 2.40 0.10          | 0.5379 0.7485 0.5860 | 1.0355 0.7408 0.5827  | C(22) | 116 |
| H(18) | .... | H(17) | [ |          | ] | 2.40 2.40 0.00 Intra    | 0.5379 0.7485 0.5860 | 0.6737 0.6368 0.6237  |       |     |
| H(18) | .... | C(11) | [ | 3566.01] |   | 2.89 < 2.90 -0.01       | 0.5379 0.7485 0.5860 | 0.7157 0.8873 0.5502  | C(22) | 136 |
| H(18) | .... | H(8)  | [ | 3566.01] |   | 2.28 < 2.40 -0.12       | 0.5379 0.7485 0.5860 | 0.6208 0.8475 0.5364  | C(22) | 146 |
| H(19) | .... | S(2)  | [ | 1655.01] |   | 2.92 < 3.00 -0.08       | 0.5480 0.7496 0.6488 | 1.1101 0.7609 0.6200  | C(22) | 108 |
| H(19) | .... | O(8)  | [ |          | ] | 2.58 < 2.72 -0.14 Intra | 0.5480 0.7496 0.6488 | 0.3970 0.6461 0.7090  |       |     |
| H(19) | .... | C(23) | [ |          | ] | 2.76 < 2.90 -0.14 Intra | 0.5480 0.7496 0.6488 | 0.3275 0.6158 0.6640  |       |     |
| H(19) | .... | H(17) | [ |          | ] | 2.29 < 2.40 -0.11 Intra | 0.5480 0.7496 0.6488 | 0.6737 0.6368 0.6237  |       |     |
| H(19) | .... | C(19) | [ | 4756.01] |   | 2.98 2.90 0.08          | 0.5480 0.7496 0.6488 | 0.7240 0.7756 0.7588  | C(22) | 161 |
| H(19) | .... | H(15) | [ | 4756.01] |   | 2.48 2.40 0.08          | 0.5480 0.7496 0.6488 | 0.5436 0.7784 0.7441  | C(22) | 148 |

|       |      |       |   |          |   |        |        |       |       |        |        |        |         |        |        |       |     |
|-------|------|-------|---|----------|---|--------|--------|-------|-------|--------|--------|--------|---------|--------|--------|-------|-----|
| H(20) | .... | S(1)  | [ |          | ] | 3.11   | 3.00   | 0.11  | Intra | 0.3137 | 0.5752 | 0.7657 | 0.7261  | 0.4551 | 0.7425 | C(24) | 145 |
| H(20) | .... | O(7)  | [ |          | ] | 2.81   | 2.72   | 0.09  | Intra | 0.3137 | 0.5752 | 0.7657 | 0.1614  | 0.5693 | 0.6594 |       |     |
| H(20) | .... | C(23) | [ |          | ] | 2.70<< | 2.90   | -0.20 | Intra | 0.3137 | 0.5752 | 0.7657 | 0.3275  | 0.6158 | 0.6640 |       |     |
| H(20) | .... | O(1)  | [ | 2565.01] |   | 2.82   | 2.72   | 0.10  |       | 0.3137 | 0.5752 | 0.7657 | -0.0950 | 0.5854 | 0.8417 |       |     |
| H(21) | .... | O(7)  | [ |          | ] | 2.46<< | 2.72   | -0.26 | Intra | 0.0597 | 0.6200 | 0.7465 | 0.1614  | 0.5693 | 0.6594 |       |     |
| H(21) | .... | C(23) | [ |          | ] | 2.49<< | 2.90   | -0.41 | Intra | 0.0597 | 0.6200 | 0.7465 | 0.3275  | 0.6158 | 0.6640 |       |     |
| H(21) | .... | H(1)  | [ | 1455.01] |   | 2.57   | 2.40   | 0.17  |       | 0.0597 | 0.6200 | 0.7465 | -0.1181 | 0.4911 | 0.7471 | C(24) | 113 |
| H(21) | .... | O(1)  | [ | 2565.01] |   | 2.62   | < 2.72 | -0.10 |       | 0.0597 | 0.6200 | 0.7465 | -0.0950 | 0.5854 | 0.8417 |       |     |
| H(22) | .... | O(1)  | [ | 2565.01] |   | 2.73   | 2.72   | 0.01  |       | 0.2778 | 0.6567 | 0.7837 | -0.0950 | 0.5854 | 0.8417 |       |     |
| H(22) | .... | O(4)  | [ | 4656.01] |   | 2.70   | < 2.72 | -0.02 |       | 0.2778 | 0.6567 | 0.7837 | 0.1362  | 0.7846 | 0.8243 | C(24) | 146 |

Summary of Shortest Inter Contacts with  $d(I-J) < R(I) + R(J) + 0.2$  of Residue # 1 to Neighbouring ARU' S

| Nr | ARU        | Nr.Cont. | d(min) | Del   | XHn X   | - At(I) | At(J)     | - Y    | YHn | Note | Partaking ARU' s in Close Contact Resd. |
|----|------------|----------|--------|-------|---------|---------|-----------|--------|-----|------|-----------------------------------------|
| 1  | [ 1455.01] | 36       | 2.0800 | -0.64 | 1 N(1)  | - H(3)  | ... O(3)  | -C(15) | 0   | <<   | 1455.01                                 |
| 2  | [ 3466.01] | 4        | 2.2800 | -0.12 | 1 C(11) | - H(8)  | ... H(18) | -C(22) | 2   | <    | 3466.01                                 |
| 3  | [ 3566.01] | 4        | 2.2800 | -0.12 | 2 C(22) | - H(18) | ... H(8)  | -C(11) | 1   | <    | 3566.01                                 |
| 4  | [ 4656.01] | 2        | 2.7000 | -0.02 | 3 C(24) | - H(22) | ... O(4)  | -C(18) | 0   | <    | 4656.01                                 |
| 5  | [ 2564.01] | 4        | 2.6200 | -0.10 | 0 C(1)  | - O(1)  | ... H(21) | -C(24) | 3   | <    | 2564.01                                 |
| 6  | [ 1655.01] | 36       | 2.0800 | -0.64 | 0 C(15) | - O(3)  | ... H(3)  | -N(1)  | 1   | <<   | 1655.01                                 |
| 7  | [ 3456.01] | 6        | 2.4900 | 0.09  | 1 C(3)  | - H(5)  | ... H(16) | -C(19) | 3   |      | 3456.01                                 |
| 8  | [ 4646.01] | 2        | 2.7000 | -0.02 | 0 C(18) | - O(4)  | ... H(22) | -C(24) | 3   | <    | 4646.01                                 |
| 9  | [ 4756.01] | 4        | 2.4800 | 0.08  | 2 C(22) | - H(19) | ... H(15) | -C(19) | 3   |      | 4756.01                                 |
| 10 | [ 3556.01] | 6        | 2.4900 | 0.09  | 3 C(19) | - H(16) | ... H(5)  | -C(3)  | 1   |      | 3556.01                                 |
| 11 | [ 4746.01] | 4        | 2.4800 | 0.08  | 3 C(19) | - H(15) | ... H(19) | -C(22) | 2   |      | 4746.01                                 |
| 12 | [ 2565.01] | 4        | 2.6200 | -0.10 | 3 C(24) | - H(21) | ... O(1)  | -C(1)  | 0   | <    | 2565.01                                 |

Symbols :: < denotes contacts less than the sum of the van der Waals Radii and << contacts less than this sum minus 0.2 Angstrom.

Nr.Cont. = Number of short contacts from current ARU to surrounding ARU' s (from list above).

#### Asymmetric Residue Unit (= ARU) Code List

| ARU-CODE   | CIF-CODE   | Symmetry-Code       | sym | TX | TY | TZ | Ires | x (cen) | y (cen) | z (cen) |       |       |
|------------|------------|---------------------|-----|----|----|----|------|---------|---------|---------|-------|-------|
| [ 1455.01] | = [ 1_455] | =-1+x, y, z         | = [ | 1  | -1 | 0  | 0    | 1       | ]       | -0.320  | 0.491 | 0.573 |
| [ 3466.01] | = [ 2_466] | =-1/2+x, 3/2-y, 1-z | = [ | 3  | -1 | 1  | 1    | 1       | ]       | 0.180   | 1.009 | 0.427 |
| [ 3566.01] | = [ 2_566] | =1/2+x, 3/2-y, 1-z  | = [ | 3  | 0  | 1  | 1    | 1       | ]       | 1.180   | 1.009 | 0.427 |
| [ 4656.01] | = [ 3_656] | =1-x, 1/2+y, 3/2-z  | = [ | 4  | 1  | 0  | 1    | 1       | ]       | 0.320   | 0.991 | 0.927 |
| [ 2564.01] | = [ 4_564] | =1/2-x, 1-y, -1/2+z | = [ | 2  | 0  | 1  | -1   | 1       | ]       | -0.180  | 0.509 | 0.073 |
| [ 1655.01] | = [ 1_655] | =1+x, y, z          | = [ | 1  | 1  | 0  | 0    | 1       | ]       | 1.680   | 0.491 | 0.573 |
| [ 3456.01] | = [ 2_456] | =-1/2+x, 1/2-y, 1-z | = [ | 3  | -1 | 0  | 1    | 1       | ]       | 0.180   | 0.009 | 0.427 |

|                                           |                  |        | "A-Co  | " PLATON-INTER | Page | 53 |
|-------------------------------------------|------------------|--------|--------|----------------|------|----|
| =====                                     |                  |        |        |                |      |    |
| [ 4646.01] = [ 3_646] =1-x, -1/2+y, 3/2-z | = [ 4 1 -1 1 1 ] | 0.320  | -0.009 | 0.927          |      |    |
| [ 4756.01] = [ 3_756] =2-x, 1/2+y, 3/2-z  | = [ 4 2 0 1 1 ]  | 1.320  | 0.991  | 0.927          |      |    |
| [ 3556.01] = [ 2_556] =1/2+x, 1/2-y, 1-z  | = [ 3 0 0 1 1 ]  | 1.180  | 0.009  | 0.427          |      |    |
| [ 4746.01] = [ 3_746] =2-x, -1/2+y, 3/2-z | = [ 4 2 -1 1 1 ] | 1.320  | -0.009 | 0.927          |      |    |
| [ 2565.01] = [ 4_565] =1/2-x, 1-y, 1/2+z  | = [ 2 0 1 0 1 ]  | -0.180 | 0.509  | 1.073          |      |    |

Note: Symmetry Operations Refer to the Coordinates listed in the Fractional Coordinate Table given above

X(J) = X(sym) + TX , Y(J) = Y(sym) + TY , Z(J) = Z(sym) + TZ,

Sym

-

Number of the Symmetry Operator.

Ires

-

Residue Number.

TX, TY, TZ

-

Unit Cell Translations.

Analysis of Short Non-Hydrogen Inter-Molecular Contacts For Inter-Molecular Clusters and/or Networks (Minor Disorder Excluded)

| Contact-Nr | Atom I[ | ARU | ]        | Atom J[ | ARU   | ] | d(I-J)   | Del           |
|------------|---------|-----|----------|---------|-------|---|----------|---------------|
| 1          | O(1)    | [   | 1555.01] | ...     | C(24) | [ | 2564.01] | = 2.889 -0.33 |
| 2          | C(24)   | [   | 1555.01] | ...     | O(1)  | [ | 2565.01] | = 2.889 -0.33 |

Cluster = 1

(N:M) : ARU -- Connected with (N) Interactions to/from (M) ARU(S). T = Translated Molecule (Infinite chain etc.)

|   |   |         |    |          |          |
|---|---|---------|----|----------|----------|
| 2 | 2 | 1555.01 | -- | 2564.01  | 2565.01T |
| 2 | 2 | 2564.01 | -- | 1554.01T | 1555.01  |

Cluster = 2

(N:M) : ARU -- Connected with (N) Interactions to/from (M) ARU(S). T = Translated Molecule (Infinite chain etc.)

|   |   |         |    |          |          |
|---|---|---------|----|----------|----------|
| 2 | 2 | 3555.01 | -- | 4645.01  | 4644.01T |
| 2 | 2 | 4645.01 | -- | 3556.01T | 3555.01  |

Analysis of Potential Hydrogen Bonds and Schemes with  $d(D...A) < R(D)+R(A)+0.50$ ,  $d(H...A) < R(H)+R(A)-0.12$  Ang.,  $D-H...A > 100.0$  Deg

Note: - ARU codes in [] are with reference to the Coordinates printed above (Possibly transformed, when MOVE .NE. 1.555)

| Nr | Typ   | Res | Donor   | --- H... Acceptor | [ ARU ]            | D - H | H...A | D...A    | D - H...A | A...H...A* A'...H...A'' | Sum (XY, YZ) | Sum (XZ) |
|----|-------|-----|---------|-------------------|--------------------|-------|-------|----------|-----------|-------------------------|--------------|----------|
|    |       |     | 1 S(1)  | --H(1)            | .. ?               | 1.04  |       |          |           |                         |              |          |
|    |       |     | 1 S(2)  | --H(2)            | .. ?               | 1.09  |       |          |           |                         |              |          |
| 1  |       |     | 1 N(1)  | --H(3)            | .. 0(3) [ 1455.01] | 0.88  | 2.08  | 2.890(2) | 153       |                         |              |          |
| 2  |       |     | 1 N(2)  | --H(4)            | .. 0(2) [ 1455.01] | 0.88  | 2.55  | 3.373(2) | 156       |                         |              |          |
| 3  | Intra | 1   | N(2)    | --H(4)            | .. 0(7) [ ]        | 0.88  | 2.34  | 2.687(2) | 104'      | 100'                    | 360          |          |
| 4  |       |     | 1 C(4)  | --H(6)            | .. 0(4) [ 3556.01] | 0.95  | 2.56  | 3.306(3) | 136       |                         |              |          |
| 5  |       |     | 1 C(11) | --H(8)            | .. 0(6) [ 1455.01] | 0.95  | 2.54  | 3.284(2) | 135       |                         |              |          |
| 6  |       |     | 1 C(16) | --H(11)           | .. 0(7) [ 1655.01] | 1.00  | 2.48  | 3.214(2) | 130       |                         |              |          |
| 7  |       |     | 1 C(17) | --H(12)           | .. 0(3) [ 1455.01] | 0.99  | 2.49  | 3.198(2) | 128       |                         |              |          |
| 8  |       |     | 1 C(17) | --H(12)           | .. 0(5) [ 1455.01] | 0.99  | 2.53  | 3.319(2) | 136'      | 96'                     | 360          |          |
| 9  | Intra | 1   | C(22)   | --H(18)           | .. 0(6) [ ]        | 0.99  | 2.39  | 3.018(2) | 121       |                         |              |          |

Translation of ARU-Code to CIF and Equivalent Position Code

[ 1455. ] = [ 1\_455 ] = -1+x, y, z  
 [ 1655. ] = [ 1\_655 ] = 1+x, y, z  
 [ 3556. ] = [ 2\_556 ] = 1/2+x, 1/2-y, 1-z

For C--H...Acceptor Interactions See: Th. Steiner, Cryst. Rev, (1996), 6, 1-57

H-Bond classification [G.A.Jeffrey, H.Maluszynska & J.Mitra., Int. J. Biol. Macromol. (1985), 7, 336-348]

2-Centre (linear) D-H...X most prob. angle 160 deg - also: G.A.Jeffrey & W.Saenger, Hydrogen Bonding in Biological Structures  
 3-Centre (bifurcated) SUM of 3 angl. about H = 360 deg Springer-Verlag, Berlin, 1991, pp 20.  
 4-Centre (trifurcated)

Analysis of Potential Donor/Acceptor Atoms -- (Major Disorder Form Only)

| At. Nr | D/A  | #Cov. Bonds | # H | #D-H...A | #A...H | #A...H-C | Sum (A-H) | Sum (A-X) |
|--------|------|-------------|-----|----------|--------|----------|-----------|-----------|
| 1      | S(1) | 2           | 1 H | 0        | 0      | 0        | 0         | 1         |
| 2      | S(2) | 2           | 1 H | 0        | 0      | 0        | 0         | 1         |
| 3      | O(1) | 1           | -   | 0        | 0      | 0        | 0         | 1         |
| 4      | O(2) | 1           | -   | 0        | 1      | 0        | 1         | 2         |
| 5      | O(3) | 1           | -   | 0        | 1      | 1        | 2         | 3         |
| 6      | O(4) | 1           | -   | 0        | 0      | 1        | 1         | 2         |
| 7      | O(5) | 2           | -   | 0        | 0      | 1        | 1         | 3         |

|    |      |   |     |   |   |   |   |   |
|----|------|---|-----|---|---|---|---|---|
| 8  | O(6) | 1 | -   | 0 | 0 | 2 | 2 | 3 |
| 9  | O(7) | 1 | -   | 0 | 1 | 1 | 2 | 3 |
| 10 | O(8) | 2 | -   | 0 | 0 | 0 | 0 | 2 |
| 11 | N(1) | 3 | 1 H | 1 | 0 | 0 | 1 | 3 |
| 12 | N(2) | 3 | 1 H | 2 | 0 | 0 | 2 | 4 |



Analysis of Hydrogen Bonded Molecular Aggregates (See also Acta Cryst. B36, 1980, 2113 – 2115) -- (Major Disorder Component Only)

| Coordinates of Donor and Acceptor Atoms |             |        |        |        |    |       |             |         |        | Coordinates of D/A-Bonded Atom(s) |        |         |        |        |               |
|-----------------------------------------|-------------|--------|--------|--------|----|-------|-------------|---------|--------|-----------------------------------|--------|---------|--------|--------|---------------|
| D/A I                                   | [ ARU ]     | X      | Y      | Z      | -- | D/A J | [ ARU ]     | X       | Y      | Z                                 | Atom K | X       | Y      | Z      | I..J--K Angle |
| N(1)                                    | [ 1555.01], | 0.9272 | 0.3918 | 0.5941 | >> | O(3)  | [ 1455.01], | 0.3628  | 0.4027 | 0.5726                            | C(15)  | 0.1287  | 0.3946 | 0.5597 | 167.90(14)    |
| O(3)                                    | [ 1555.01], | 1.3628 | 0.4027 | 0.5726 | << | N(1)  | [ 1655.01], | 1.9272  | 0.3918 | 0.5941                            | C(15)  | 2.1287  | 0.3946 | 0.5597 | 127.73(11)    |
|                                         |             |        |        |        |    |       |             |         |        |                                   | C(16)  | 1.9681  | 0.4058 | 0.6501 | 108.01(10)    |
|                                         |             |        |        |        |    |       |             |         |        |                                   | H(3)   | 1.7661  | 0.3812 | 0.5828 | 19.10(12)     |
| N(2)                                    | [ 1555.01], | 0.3927 | 0.6148 | 0.5702 | >> | O(2)  | [ 1455.01], | -0.1347 | 0.5171 | 0.5299                            | C(8)   | -0.2264 | 0.4884 | 0.4907 | 141.27(12)    |
| O(2)                                    | [ 1555.01], | 0.8653 | 0.5171 | 0.5299 | << | N(2)  | [ 1655.01], | 1.3927  | 0.6148 | 0.5702                            | C(20)  | 1.5274  | 0.6258 | 0.5251 | 102.58(10)    |
|                                         |             |        |        |        |    |       |             |         |        |                                   | C(21)  | 1.4806  | 0.6483 | 0.6187 | 136.85(10)    |
|                                         |             |        |        |        |    |       |             |         |        |                                   | H(4)   | 1.2507  | 0.5871 | 0.5702 | 17.84(11)     |
| N(2)                                    | [ 1555.01], | 0.3927 | 0.6148 | 0.5702 | >> | O(7)  | [ 1555.01], | 0.1614  | 0.5693 | 0.6594                            | C(23)  | 0.3275  | 0.6158 | 0.6640 | 63.77(10)     |
| O(7)                                    | [ 1555.01], | 0.1614 | 0.5693 | 0.6594 | << | N(2)  | [ 1555.01], | 0.3927  | 0.6148 | 0.5702                            | C(20)  | 0.5274  | 0.6258 | 0.5251 | 169.79(13)    |
|                                         |             |        |        |        |    |       |             |         |        |                                   | C(21)  | 0.4806  | 0.6483 | 0.6187 | 63.25(8)      |
|                                         |             |        |        |        |    |       |             |         |        |                                   | H(4)   | 0.2507  | 0.5871 | 0.5702 | 57.53(12)     |

\*\*\*\*\* Aggregate = 1 \*\*\*\*\*

(N:M) : ARU -- Connected with N Hydrogen Bonds to/from M ARU(S). T = Translated Molecule (Infinite chain etc.)

4 2 1555.01 -- 1455.01T 1655.01T

\*\*\*\*\* Aggregate = 2 \*\*\*\*\*

(N:M) : ARU -- Connected with N Hydrogen Bonds to/from M ARU(S). T = Translated Molecule (Infinite chain etc.)

4 2 2555.01 -- 2655.01T 2455.01T

\*\*\*\*\* Aggregate = 3 \*\*\*\*\*

(N:M) : ARU -- Connected with N Hydrogen Bonds to/from M ARU(S). T = Translated Molecule (Infinite chain etc.)

4 2 3555.01 -- 3455.01T 3655.01T

=====

=====

\*\*\*\*\* Aggregate = 4 \*\*\*\*\*

=====

(N:M) : ARU -- Connected with N Hydrogen Bonds to/from M ARU(S). T = Translated Molecule (Infinite chain etc.)

-----

4 2 4555.01 -- 4655.01T 4455.01T

=====

Search for Infinite ARU-Chains (Max = 4)

=====

1-Membered Infinite ARU-Chain (Translation [ -1 0 0])

1555.01 1455.01

Analysis of the (Cooperative) Hydrogen Bond Network (i.e. (In)Finite O-H...O-H...O-H.. Chains and/or Rings (Max = 18 Membered))

=====  
\*\*\*\*\* NetworkK = 1 \*\*\*\*\*  
=====

| Code  | Acc | Donor Atom      | X      | Y      | Z      | Acceptor Atom   | X      | Y      | Z up to BondCode(s) of Forward Link(s) |
|-------|-----|-----------------|--------|--------|--------|-----------------|--------|--------|----------------------------------------|
| 1.555 |     | N(1) [ 1555.01] | 0.9272 | 0.3918 | 0.5941 | O(3) [ 1455.01] | 0.3628 | 0.4027 | 0.5726                                 |
|       |     | H(3)            | 0.7661 | 0.3812 | 0.5828 |                 |        |        |                                        |

=====  
\*\*\*\*\* NetworkK = 2 \*\*\*\*\*  
=====

| Code  | Acc | Donor Atom      | X      | Y      | Z      | Acceptor Atom   | X       | Y      | Z up to BondCode(s) of Forward Link(s) |
|-------|-----|-----------------|--------|--------|--------|-----------------|---------|--------|----------------------------------------|
| 2.555 |     | N(2) [ 1555.01] | 0.3927 | 0.6148 | 0.5702 | O(2) [ 1455.01] | -0.1347 | 0.5171 | 0.5299                                 |
|       |     | H(4)            | 0.2507 | 0.5871 | 0.5702 |                 |         |        |                                        |
| 3.555 |     | N(2) [ 1555.01] | 0.3927 | 0.6148 | 0.5702 | O(7) [ 1555.01] | 0.1614  | 0.5693 | 0.6594                                 |
|       |     | H(4)            | 0.2507 | 0.5871 | 0.5702 |                 |         |        |                                        |

-----  
  
Hydrogen Bonds are Coded as N.IJK Where N = Sequence Number of Hydrogen Bond (NOTE: New Hbond Numbering system)  
I - 5 = Nr of Translation Units Along A-Axis  
J - 5 = Nr of Translation Units Along B-Axis  
K - 5 = Nr of Translation Units Along C-Axis

Ring Closure Links are Indicated with 'R' and Infinite Chain Links With 'T'

Distances are calculated from atom I of Unique Molecule Coordinate List to atom J in Asymmetric Residue Unit: ARU.

Phi = Azimuth angle(counter clockwise from X0 in X0,Y0-Plane), Mu = Angle between D and X0,Y0-plane.

'To-Code' : '---' = Bonded atoms, '<<' = .LT. sum vdW-radii - 0.2, '<' = .LT. sum vdW-radii, '..' = .GT. sum vdW-radii.

>>>> NOTICE >>>> : The Symmetry Code Character Added to the Atom Label Applies to the Current Coordination Sphere Only.

>>>>>>>>>>>> : Symmetry operations refer to the coordinates listed in the fractional coordinate table given above

The List May be Limited to the Shortest Distances.

| 3.6 Angstrom Coordination Sphere Around Atom I = S(1) [ARU = 1555.01] 0.72615 0.45508 0.74252 3.6414 8.5042 18.8871 |            |    |         |                    |            |        |       |         |        |         |         |         |        |         |         |
|---------------------------------------------------------------------------------------------------------------------|------------|----|---------|--------------------|------------|--------|-------|---------|--------|---------|---------|---------|--------|---------|---------|
| Nr                                                                                                                  | d(I, J)    | To | Atom J  | Symm_Oper.         | on Atom J  | ARU(J) | Type  | Phi     | Mu     | X       | Y       | Z       | X0     | Y0      | Z0      |
| 1                                                                                                                   | 1.04       | -- | H(1)    |                    |            |        | Intra | 40.75   | 6.39   | 0.88193 | 0.49110 | 0.74706 | 4.4226 | 9.1773  | 19.0026 |
| 2                                                                                                                   | 1.8098(19) | -- | C(17)   |                    |            |        | Intra | -94.32  | -83.35 | 0.72300 | 0.44389 | 0.67185 | 3.6256 | 8.2951  | 17.0895 |
| 3                                                                                                                   | 2.8005(19) | << | C(16)   |                    |            |        | Intra | -37.19  | -57.05 | 0.96810 | 0.40581 | 0.65013 | 4.8547 | 7.5835  | 16.5370 |
| 4                                                                                                                   | 3.104(2)   | << | C(18)   |                    |            |        | Intra | -57.53  | -31.26 | 1.01020 | 0.33530 | 0.67921 | 5.0659 | 6.2659  | 17.2767 |
| 5                                                                                                                   | 3.4321(16) | .. | O(5)    |                    |            |        | Intra | -41.08  | -14.32 | 1.22600 | 0.33814 | 0.70915 | 6.1480 | 6.3189  | 18.0383 |
| 6                                                                                                                   | 3.4332(16) | .. | O(5) a  | [-1+x, y, z        | = 1455.01] |        |       | -138.93 | -14.31 | 0.22600 | 0.33814 | 0.70915 | 1.1333 | 6.3189  | 18.0383 |
| 7                                                                                                                   | 2.33       | << | H(13)   |                    |            |        | Intra | 97.04   | -72.78 | 0.70933 | 0.49163 | 0.65520 | 3.5571 | 9.1872  | 16.6660 |
| 8                                                                                                                   | 2.33       | << | H(12)   |                    |            |        | Intra | -138.64 | -61.88 | 0.56210 | 0.41633 | 0.66189 | 2.8188 | 7.7801  | 16.8362 |
| 9                                                                                                                   | 3.03       | .. | H(11)   |                    |            |        | Intra | -9.53   | -47.48 | 1.12845 | 0.43696 | 0.65482 | 5.6588 | 8.1656  | 16.6563 |
| 10                                                                                                                  | 3.11       | .. | H(20)   |                    |            |        | Intra | 132.65  | 10.92  | 0.31375 | 0.57521 | 0.76568 | 1.5734 | 10.7491 | 19.4762 |
| 11                                                                                                                  | 3.51       | .. | H(21) b | [1+x, y, z         | = 1655.01] |        |       | 61.51   | 1.65   | 1.05972 | 0.61999 | 0.74650 | 5.3142 | 11.5859 | 18.9883 |
| 12                                                                                                                  | 3.58       | .. | H(15) a | [-1+x, y, z        | = 1455.01] |        |       | -112.28 | 5.44   | 0.45638 | 0.27836 | 0.75587 | 2.2886 | 5.2018  | 19.2267 |
| 13                                                                                                                  | 3.59       | .. | H(10) c | [1/2-x, 1-y, 1/2+z | = 2565.01] |        |       | 162.65  | 48.31  | 0.27114 | 0.49322 | 0.84805 | 1.3597 | 9.2169  | 21.5714 |

Angles (Degrees) At1...V...At2 with Vertex V = S(1)

|       |   |       |          |       |   |       |          |       |   |       |          |       |   |       |          |
|-------|---|-------|----------|-------|---|-------|----------|-------|---|-------|----------|-------|---|-------|----------|
| C(17) | , | C(16) | 29.81(7) | C(17) | , | C(18) | 53.51(7) | C(17) | , | O(5)  | 71.77(7) | C(17) | , | O(5)a | 71.00(7) |
| C(16) | , | C(18) | 29.38(5) | C(16) | , | O(5)  | 42.84(5) | C(16) | , | O(5)a | 84.25(5) | C(18) | , | O(5)  | 22.67(4) |
| C(18) | , | O(5)a | 75.40(5) | O(5)  | , | O(5)a | 93.85(4) |       |   |       |          |       |   |       |          |

Angles (Degrees) At1...V...At2 with Vertex V = S(2)[illegible]

| 3.6 Angstrom Coordination Sphere Around Atom I = O(1) [ARU = 1555.01] 0.59500 0.41462 0.34165 2.9838 7.7481 8.6904 |          |    |         |                     |            |        |       |         |        |         |         |         |        |        |         |
|--------------------------------------------------------------------------------------------------------------------|----------|----|---------|---------------------|------------|--------|-------|---------|--------|---------|---------|---------|--------|--------|---------|
| Nr                                                                                                                 | d(I, J)  | To | Atom J  | Symm_Oper.          | on Atom J  | ARU(J) | Type  | Phi     | Mu     | X       | Y       | Z       | X0     | Y0     | Z0      |
| 1                                                                                                                  | 1.217(2) | -- | C(1)    |                     |            |        | Intra | 62.74   | 71.64  | 0.63000 | 0.43285 | 0.38704 | 3.1593 | 8.0888 | 9.8449  |
| 2                                                                                                                  | 2.357(2) | << | C(2)    |                     |            |        | Intra | -18.04  | 58.76  | 0.82680 | 0.39436 | 0.42089 | 4.1462 | 7.3695 | 10.7060 |
| 3                                                                                                                  | 2.362(2) | << | C(14)   |                     |            |        | Intra | 110.67  | 47.62  | 0.48290 | 0.49434 | 0.41026 | 2.4216 | 9.2379 | 10.4356 |
| 4                                                                                                                  | 2.782(3) | << | C(3)    |                     |            |        | Intra | -39.86  | 32.54  | 0.95400 | 0.33419 | 0.40047 | 4.7840 | 6.2451 | 10.1866 |
| 5                                                                                                                  | 2.807(3) | << | C(13)   |                     |            |        | Intra | 127.71  | 21.20  | 0.27580 | 0.52540 | 0.38155 | 1.3831 | 9.8183 | 9.7053  |
| 6                                                                                                                  | 2.889(3) | << | C(24) a | [1/2-x, 1-y, -1/2+z | = 2564.01] |        |       | -158.12 | -49.78 | 0.24980 | 0.37741 | 0.25493 | 1.2527 | 7.0528 | 6.4845  |
| 7                                                                                                                  | 2.48     | << | H(5)    |                     |            |        | Intra | -48.44  | 14.39  | 0.91339 | 0.31825 | 0.36592 | 4.5804 | 5.9472 | 9.3077  |
| 8                                                                                                                  | 2.52     | << | H(10)   |                     |            |        | Intra | 136.83  | 3.70   | 0.22886 | 0.50678 | 0.34805 | 1.1477 | 9.4704 | 8.8532  |
| 9                                                                                                                  | 2.62     | .< | H(21) a | [1/2-x, 1-y, -1/2+z | = 2564.01] |        |       | -140.19 | -67.35 | 0.44028 | 0.38001 | 0.24650 | 2.2079 | 7.1014 | 6.2701  |
| 10                                                                                                                 | 2.73     | .. | H(22) a | [1/2-x, 1-y, -1/2+z | = 2564.01] |        |       | -144.52 | -32.71 | 0.22224 | 0.34332 | 0.28370 | 1.1145 | 6.4157 | 7.2163  |
| 11                                                                                                                 | 2.82     | .. | H(20) a | [1/2-x, 1-y, -1/2+z | = 2564.01] |        |       | 174.70  | -43.19 | 0.18625 | 0.42479 | 0.26568 | 0.9340 | 7.9382 | 6.7580  |
| 12                                                                                                                 | 2.98     | .. | H(1) b  | [3/2-x, 1-y, -1/2+z | = 2664.01] |        |       | 86.24   | -53.73 | 0.61807 | 0.50890 | 0.24706 | 3.0994 | 9.5100 | 6.2843  |
| 13                                                                                                                 | 3.27     | .. | H(16) c | [-1/2+x, 1/2-y, 1-z | = 3456.01] |        |       | -73.25  | -28.44 | 0.75995 | 0.26750 | 0.28052 | 3.8109 | 4.9989 | 7.1354  |
| 14                                                                                                                 | 3.54     | .. | H(20) b | [3/2-x, 1-y, -1/2+z | = 2664.01] |        |       | 3.67    | -33.04 | 1.18625 | 0.42479 | 0.26568 | 5.9487 | 7.9382 | 6.7580  |

Angles (Degrees) At1...V...At2 with Vertex V = O(1)

|      |   |        |            |       |   |        |           |       |   |        |           |       |   |        |            |
|------|---|--------|------------|-------|---|--------|-----------|-------|---|--------|-----------|-------|---|--------|------------|
| C(1) | , | C(2)   | 33.11(11)  | C(1)  | , | C(14)  | 32.50(11) | C(1)  | , | C(3)   | 63.10(12) | C(1)  | , | C(13)  | 62.13(12)  |
| C(1) | , | C(24)a | 151.47(17) | C(2)  | , | C(14)  | 65.61(7)  | C(2)  | , | C(3)   | 30.03(6)  | C(2)  | , | C(13)  | 95.19(7)   |
| C(2) | , | C(24)a | 155.46(9)  | C(14) | , | C(3)   | 95.59(8)  | C(14) | , | C(13)  | 29.78(6)  | C(14) | , | C(24)a | 124.98(10) |
| C(3) | , | C(13)  | 124.97(7)  | C(3)  | , | C(24)a | 131.94(8) | C(13) | , | C(24)a | 96.43(8)  |       |   |        |            |



3.6 Angstrom Coordination Sphere Around Atom I = O(2) [ARU = 1555.01] 0.86530 0.51705 0.52992 4.3392 9.6623 13.4793

| Nr | d(I, J)    | To | Atom J | Symm_Oper.  | on Atom J | ARU(J)   | Type  | Phi     | Mu     | X       | Y       | Z       | X0     | Y0      | Z0      |
|----|------------|----|--------|-------------|-----------|----------|-------|---------|--------|---------|---------|---------|--------|---------|---------|
| 1  | 1.221(2)   | -- | C(8)   |             |           |          | Intra | -130.69 | -54.72 | 0.77360 | 0.48843 | 0.49073 | 3.8794 | 9.1274  | 12.4825 |
| 2  | 2.366(2)   | << | C(7)   |             |           |          | Intra | -87.42  | -38.51 | 0.88190 | 0.41809 | 0.47201 | 4.4225 | 7.8130  | 12.0063 |
| 3  | 2.373(2)   | << | C(9)   |             |           |          | Intra | 176.07  | -49.37 | 0.55790 | 0.52272 | 0.45912 | 2.7977 | 9.7682  | 11.6784 |
| 4  | 2.648(2)   | << | C(20)  |             |           |          | Intra | 129.83  | -2.64  | 0.52740 | 0.62575 | 0.52513 | 2.6448 | 11.6936 | 13.3575 |
| 5  | 2.749(2)   | << | C(15)  |             |           |          | Intra | -60.01  | 15.97  | 1.12870 | 0.39458 | 0.55965 | 5.6601 | 7.3736  | 14.2355 |
| 6  | 2.844(2)   | << | C(6)   |             |           |          | Intra | -69.23  | -13.80 | 1.06060 | 0.37888 | 0.50325 | 5.3186 | 7.0802  | 12.8009 |
| 7  | 2.845(2)   | << | C(10)  |             |           |          | Intra | 150.02  | -27.77 | 0.43040 | 0.58437 | 0.47781 | 2.1583 | 10.9203 | 12.1538 |
| 8  | 2.8719(19) | .< | N(1)   |             |           |          | Intra | -82.45  | 34.67  | 0.92720 | 0.39175 | 0.59414 | 4.6496 | 7.3207  | 15.1128 |
| 9  | 2.9539(18) | .< | O(6)   |             |           |          | Intra | 105.31  | -4.56  | 0.71030 | 0.66903 | 0.52069 | 3.5619 | 12.5024 | 13.2445 |
| 10 | 3.162(2)   | .. | N(2)   |             |           |          | Intra | 142.39  | 18.89  | 0.39270 | 0.61475 | 0.57017 | 1.9693 | 11.4880 | 14.5031 |
| 11 | 3.231(2)   | .. | C(11)b | [1+x, y, z  | =         | 1655.01] |       | 45.50   | -39.11 | 1.21570 | 0.61272 | 0.44981 | 6.0964 | 11.4501 | 11.4416 |
| 12 | 3.372(2)   | .. | C(10)b | [1+x, y, z  | =         | 1655.01] |       | 23.94   | -23.15 | 1.43040 | 0.58437 | 0.47781 | 7.1730 | 10.9203 | 12.1538 |
| 13 | 3.373(2)   | .. | N(2)b  | [1+x, y, z  | =         | 1655.01] |       | 34.62   | 17.67  | 1.39270 | 0.61475 | 0.57017 | 6.9840 | 11.4880 | 14.5031 |
| 14 | 3.460(2)   | .. | O(3)   |             |           |          | Intra | -40.58  | 18.29  | 1.36280 | 0.40269 | 0.57261 | 6.8340 | 7.5252  | 14.5652 |
| 15 | 3.478(2)   | .. | O(3)a  | [-1+x, y, z | =         | 1455.01] |       | -139.70 | 18.19  | 0.36280 | 0.40269 | 0.57261 | 1.8193 | 7.5252  | 14.5652 |
| 16 | 2.55       | .< | H(4)b  | [1+x, y, z  | =         | 1655.01] |       | 34.10   | 23.72  | 1.25072 | 0.58708 | 0.57024 | 6.2720 | 10.9709 | 14.5049 |
| 17 | 2.92       | .. | H(3)   |             |           |          | Intra | -101.08 | 27.48  | 0.76613 | 0.38116 | 0.58283 | 3.8419 | 7.1229  | 14.8252 |
| 18 | 3.30       | .. | H(8)b  | [1+x, y, z  | =         | 1655.01] |       | 63.15   | -30.74 | 1.12084 | 0.65253 | 0.46358 | 5.6207 | 12.1940 | 11.7919 |
| 19 | 3.32       | .. | H(13)  |             |           |          | Intra | -148.73 | 73.98  | 0.70933 | 0.49163 | 0.65520 | 3.5571 | 9.1872  | 16.6660 |
| 20 | 3.41       | .. | H(17)  |             |           |          | Intra | 113.24  | 44.40  | 0.67370 | 0.63678 | 0.62365 | 3.3784 | 11.8997 | 15.8635 |
| 21 | 3.50       | .. | H(4)   |             |           |          | Intra | 156.99  | 17.03  | 0.25072 | 0.58708 | 0.57024 | 1.2573 | 10.9709 | 14.5049 |

Angles (Degrees) At1...V...At2 with Vertex V = O(2)

|       |   |        |            |       |   |        |           |       |   |        |           |       |   |        |            |
|-------|---|--------|------------|-------|---|--------|-----------|-------|---|--------|-----------|-------|---|--------|------------|
| C(8)  | , | C(7)   | 33.13(10)  | C(8)  | , | C(9)   | 32.37(10) | C(8)  | , | C(20)  | 93.29(12) | C(8)  | , | C(15)  | 92.34(11)  |
| C(8)  | , | C(6)   | 62.44(10)  | C(8)  | , | C(10)  | 61.62(11) | C(8)  | , | N(1)   | 98.51(10) | C(8)  | , | O(6)   | 104.90(11) |
| C(8)  | , | N(2)   | 103.59(12) | C(8)  | , | C(11)b | 86.12(11) | C(8)  | , | C(10)b | 99.15(12) | C(8)  | , | N(2)b  | 141.27(12) |
| C(8)  | , | O(3)   | 104.91(11) | C(8)  | , | O(3)a  | 73.32(11) | C(7)  | , | C(9)   | 65.49(7)  | C(7)  | , | C(20)  | 126.41(8)  |
| C(7)  | , | C(15)  | 60.23(6)   | C(7)  | , | C(6)   | 29.49(6)  | C(7)  | , | C(10)  | 94.73(7)  | C(7)  | , | N(1)   | 73.32(6)   |
| C(7)  | , | O(6)   | 135.35(7)  | C(7)  | , | N(2)   | 132.79(8) | C(7)  | , | C(11)b | 91.19(7)  | C(7)  | , | C(10)b | 90.99(7)   |
| C(7)  | , | N(2)b  | 125.77(8)  | C(7)  | , | O(3)   | 71.77(6)  | C(7)  | , | O(3)a  | 74.90(6)  | C(9)  | , | C(20)  | 61.00(7)   |
| C(9)  | , | C(15)  | 123.93(7)  | C(9)  | , | C(6)   | 94.77(7)  | C(9)  | , | C(10)  | 29.40(6)  | C(9)  | , | N(1)   | 122.57(7)  |
| C(9)  | , | O(6)   | 74.09(6)   | C(9)  | , | N(2)   | 74.52(6)  | C(9)  | , | C(11)b | 81.37(6)  | C(9)  | , | C(10)b | 103.35(7)  |
| C(9)  | , | N(2)b  | 135.69(7)  | C(9)  | , | O(3)   | 137.24(7) | C(9)  | , | O(3)a  | 78.10(6)  | C(20) | , | C(15)  | 163.52(8)  |
| C(20) | , | C(6)   | 154.95(8)  | C(20) | , | C(10)  | 31.67(5)  | C(20) | , | N(1)   | 136.12(7) | C(20) | , | O(6)   | 24.55(5)   |
| C(20) | , | N(2)   | 24.82(5)   | C(20) | , | C(11)b | 83.95(6)  | C(20) | , | C(10)b | 103.50(6) | C(20) | , | N(2)b  | 95.77(6)   |
| C(20) | , | O(3)   | 161.75(7)  | C(20) | , | O(3)a  | 91.27(6)  | C(15) | , | C(6)   | 31.14(5)  | C(15) | , | C(10)  | 149.85(7)  |
| C(15) | , | N(1)   | 27.46(5)   | C(15) | , | O(6)   | 161.61(7) | C(15) | , | N(2)   | 138.76(7) | C(15) | , | C(11)b | 111.90(7)  |
| C(15) | , | C(10)b | 90.86(6)   | C(15) | , | N(2)b  | 89.45(6)  | C(15) | , | O(3)   | 18.70(5)  | C(15) | , | O(3)a  | 75.56(6)   |
| C(6)  | , | C(10)  | 123.66(7)  | C(6)  | , | N(1)   | 50.07(5)  | C(6)  | , | O(6)   | 160.86(7) | C(6)  | , | N(2)   | 149.28(7)  |
| C(6)  | , | C(11)b | 99.48(6)   | C(6)  | , | C(10)b | 87.45(6)  | C(6)  | , | N(2)b  | 107.09(6) | C(6)  | , | O(3)   | 42.75(5)   |

[illegible]

| 3.6 Angstrom Coordination Sphere Around Atom I = O(3) [ARU = 1555.01] |          |    |         |                    |            |        |       |         |        |         |         |         |        |         | 1.36280 | 0.40269 | 0.57261 | 6.8340 | 7.5252 | 14.5652 |
|-----------------------------------------------------------------------|----------|----|---------|--------------------|------------|--------|-------|---------|--------|---------|---------|---------|--------|---------|---------|---------|---------|--------|--------|---------|
| Nr                                                                    | d(I, J)  | To | Atom J  | Symm_Oper.         | on Atom J  | ARU(J) | Type  | Phi     | Mu     | X       | Y       | Z       | X0     | Y0      | Z0      |         |         |        |        |         |
| 1                                                                     | 1.229(2) | -- | C(15)   |                    |            |        | Intra | -172.64 | -15.56 | 1.12870 | 0.39458 | 0.55965 | 5.6601 | 7.3736  | 14.2355 |         |         |        |        |         |
| 2                                                                     | 2.261(2) | << | N(1)    |                    |            |        | Intra | -174.65 | 14.02  | 0.92720 | 0.39175 | 0.59414 | 4.6496 | 7.3207  | 15.1128 |         |         |        |        |         |
| 3                                                                     | 2.368(2) | << | C(6)    |                    |            |        | Intra | -163.64 | -48.16 | 1.06060 | 0.37888 | 0.50325 | 5.3186 | 7.0802  | 12.8009 |         |         |        |        |         |
| 4                                                                     | 2.795(2) | << | C(16)   |                    |            |        | Intra | 178.31  | 44.88  | 0.96810 | 0.40581 | 0.65013 | 4.8547 | 7.5835  | 16.5370 |         |         |        |        |         |
| 5                                                                     | 2.890(2) | .< | N(1) a  | [1+x, y, z         | = 1655.01] |        |       | -4.13   | 10.92  | 1.92720 | 0.39175 | 0.59414 | 9.6643 | 7.3207  | 15.1128 |         |         |        |        |         |
| 6                                                                     | 2.918(3) | << | C(5)    |                    |            |        | Intra | -119.12 | -52.62 | 1.19090 | 0.31988 | 0.48145 | 5.9720 | 5.9777  | 12.2464 |         |         |        |        |         |
| 7                                                                     | 3.198(2) | .< | C(17) a | [1+x, y, z         | = 1655.01] |        |       | 23.09   | 52.12  | 1.72300 | 0.44389 | 0.67185 | 8.6403 | 8.2951  | 17.0895 |         |         |        |        |         |
| 8                                                                     | 3.339(2) | .. | C(8) a  | [1+x, y, z         | = 1655.01] |        |       | 37.87   | -38.59 | 1.77360 | 0.48843 | 0.49073 | 8.8941 | 9.1274  | 12.4825 |         |         |        |        |         |
| 9                                                                     | 3.460(2) | .. | O(2)    |                    |            |        | Intra | 139.42  | -18.29 | 0.86530 | 0.51705 | 0.52992 | 4.3392 | 9.6623  | 13.4793 |         |         |        |        |         |
| 10                                                                    | 3.473(2) | .. | C(18)   |                    |            |        | Intra | -144.54 | 51.32  | 1.01020 | 0.33530 | 0.67921 | 5.0659 | 6.2659  | 17.2767 |         |         |        |        |         |
| 11                                                                    | 3.478(2) | .. | O(2) a  | [1+x, y, z         | = 1655.01] |        |       | 40.30   | -18.19 | 1.86530 | 0.51705 | 0.52992 | 9.3539 | 9.6623  | 13.4793 |         |         |        |        |         |
| 12                                                                    | 3.528(2) | .. | C(7)    |                    |            |        | Intra | 173.19  | -46.50 | 0.88190 | 0.41809 | 0.47201 | 4.4225 | 7.8130  | 12.0063 |         |         |        |        |         |
| 13                                                                    | 2.08     | << | H(3) a  | [1+x, y, z         | = 1655.01] |        |       | -11.25  | 7.18   | 1.76613 | 0.38116 | 0.58283 | 8.8566 | 7.1229  | 14.8252 |         |         |        |        |         |
| 14                                                                    | 2.48     | << | H(11)   |                    |            |        | Intra | 151.41  | 57.38  | 1.12845 | 0.43696 | 0.65482 | 5.6588 | 8.1656  | 16.6563 |         |         |        |        |         |
| 15                                                                    | 2.49     | << | H(12) a | [1+x, y, z         | = 1655.01] |        |       | 14.31   | 65.57  | 1.56210 | 0.41633 | 0.66189 | 7.8335 | 7.7801  | 16.8362 |         |         |        |        |         |
| 16                                                                    | 2.71     | .< | H(7)    |                    |            |        | Intra | -96.41  | -41.42 | 1.31750 | 0.29446 | 0.50203 | 6.6069 | 5.5027  | 12.7699 |         |         |        |        |         |
| 17                                                                    | 3.03     | .. | H(3)    |                    |            |        | Intra | -172.34 | 4.92   | 0.76613 | 0.38116 | 0.58283 | 3.8419 | 7.1229  | 14.8252 |         |         |        |        |         |
| 18                                                                    | 3.19     | .. | H(13) a | [1+x, y, z         | = 1655.01] |        |       | 43.72   | 41.14  | 1.70933 | 0.49163 | 0.65520 | 8.5718 | 9.1872  | 16.6660 |         |         |        |        |         |
| 19                                                                    | 3.49     | .. | H(4) a  | [1+x, y, z         | = 1655.01] |        |       | 99.26   | -0.99  | 1.25072 | 0.58708 | 0.57024 | 6.2720 | 10.9709 | 14.5049 |         |         |        |        |         |
| 20                                                                    | 3.53     | .. | H(6) b  | [1/2+x, 1/2-y, 1-z | = 3556.01] |        |       | -58.30  | 4.58   | 1.73158 | 0.24248 | 0.58370 | 8.6834 | 4.5313  | 14.8473 |         |         |        |        |         |

Angles (Degrees) At1...V...At2 with Vertex V = O(3)

|        |   |        |           |        |   |        |            |        |   |       |            |        |   |        |            |
|--------|---|--------|-----------|--------|---|--------|------------|--------|---|-------|------------|--------|---|--------|------------|
| C(15)  | , | N(1)   | 29.65(10) | C(15)  | , | C(6)   | 33.44(11)  | C(15)  | , | C(16) | 61.00(11)  | C(15)  | , | N(1)a  | 167.90(15) |
| C(15)  | , | C(5)   | 55.89(11) | C(15)  | , | C(17)a | 141.36(13) | C(15)  | , | C(8)a | 118.77(13) | C(15)  | , | O(2)   | 45.82(11)  |
| C(15)  | , | C(18)  | 71.24(11) | C(15)  | , | O(2)a  | 133.18(13) | C(15)  | , | C(7)  | 33.11(10)  | N(1)   | , | C(6)   | 62.95(7)   |
| N(1)   | , | C(16)  | 31.44(6)  | N(1)   | , | N(1)a  | 153.35(8)  | N(1)   | , | C(5)  | 81.90(7)   | N(1)   | , | C(17)a | 112.10(8)  |
| N(1)   | , | C(8)a  | 142.23(8) | N(1)   | , | O(2)   | 55.62(6)   | N(1)   | , | C(18) | 44.47(6)   | N(1)   | , | O(2)a  | 146.21(8)  |
| N(1)   | , | C(7)   | 61.49(6)  | C(6)   | , | C(16)  | 94.38(8)   | C(6)   | , | N(1)a | 138.99(9)  | C(6)   | , | C(5)   | 28.26(6)   |
| C(6)   | , | C(17)a | 174.15(9) | C(6)   | , | C(8)a  | 91.16(7)   | C(6)   | , | O(2)  | 54.60(6)   | C(6)   | , | C(18)  | 100.82(7)  |
| C(6)   | , | O(2)a  | 110.28(7) | C(6)   | , | C(7)   | 15.73(5)   | C(16)  | , | N(1)a | 124.15(7)  | C(16)  | , | C(5)   | 111.26(8)  |
| C(16)  | , | C(17)a | 80.68(6)  | C(16)  | , | C(8)a  | 150.13(8)  | C(16)  | , | O(2)  | 72.41(6)   | C(16)  | , | C(18)  | 25.33(5)   |
| C(16)  | , | O(2)a  | 136.11(7) | C(16)  | , | C(7)   | 91.49(6)   | N(1)a  | , | C(5)  | 113.73(7)  | N(1)a  | , | C(17)a | 46.71(5)   |
| N(1)a  | , | C(8)a  | 63.12(5)  | N(1)a  | , | O(2)   | 144.03(7)  | N(1)a  | , | C(18) | 108.96(6)  | N(1)a  | , | O(2)a  | 52.63(5)   |
| N(1)a  | , | C(7)   | 144.36(7) | C(5)   | , | C(17)a | 157.19(8)  | C(5)   | , | C(8)a | 86.62(6)   | C(5)   | , | O(2)   | 82.25(6)   |
| C(5)   | , | C(18)  | 106.12(7) | C(5)   | , | O(2)a  | 106.97(6)  | C(5)   | , | C(7)  | 42.69(5)   | C(17)a | , | C(8)a  | 91.63(6)   |
| C(17)a | , | O(2)   | 120.42(7) | C(17)a | , | C(18)  | 76.03(6)   | C(17)a | , | O(2)a | 71.90(5)   | C(17)a | , | C(7)   | 159.88(8)  |
| C(8)a  | , | O(2)   | 87.29(6)  | C(8)a  | , | C(18)  | 167.16(7)  | C(8)a  | , | O(2)a | 20.51(4)   | C(8)a  | , | C(7)   | 86.00(6)   |
| O(2)   | , | C(18)  | 95.85(5)  | O(2)   | , | O(2)a  | 92.57(5)   | O(2)   | , | C(7)  | 39.56(4)   | C(18)  | , | O(2)a  | 146.65(6)  |
| C(18)  | , | C(7)   | 104.35(6) | O(2)a  | , | C(7)   | 102.63(6)  |        |   |       |            |        |   |        |            |

| 3.6 Angstrom Coordination Sphere Around Atom I = O(4) [ARU = 1555.01] 0.86380 0.28464 0.67573 4.3317 5.3192 17.1882 |          |    |        |                     |           |          |       |         |        |         |         |         |        |        |         |
|---------------------------------------------------------------------------------------------------------------------|----------|----|--------|---------------------|-----------|----------|-------|---------|--------|---------|---------|---------|--------|--------|---------|
| Nr                                                                                                                  | d(I, J)  | To | Atom J | Symm_Oper.          | on Atom J | ARU(J)   | Type  | Phi     | Mu     | X       | Y       | Z       | X0     | Y0     | Z0      |
| 1                                                                                                                   | 1.201(3) | -- | C(18)  |                     |           |          | Intra | 52.21   | 4.23   | 1.01020 | 0.33530 | 0.67921 | 5.0659 | 6.2659 | 17.2767 |
| 2                                                                                                                   | 2.241(2) | << | O(5)   |                     |           |          | Intra | 28.83   | 22.29  | 1.22600 | 0.33814 | 0.70915 | 6.1480 | 6.3189 | 18.0383 |
| 3                                                                                                                   | 2.414(2) | << | C(16)  |                     |           |          | Intra | 76.99   | -15.65 | 0.96810 | 0.40581 | 0.65013 | 4.8547 | 7.5835 | 16.5370 |
| 4                                                                                                                   | 2.659(3) | << | C(19)  |                     |           |          | Intra | -4.65   | 38.75  | 1.27600 | 0.27564 | 0.74116 | 6.3988 | 5.1510 | 18.8525 |
| 5                                                                                                                   | 2.901(2) | .< | N(1)   |                     |           |          | Intra | 80.97   | -45.68 | 0.92720 | 0.39175 | 0.59414 | 4.6496 | 7.3207 | 15.1128 |
| 6                                                                                                                   | 3.060(2) | .< | C(17)  |                     |           |          | Intra | 103.35  | -1.85  | 0.72300 | 0.44389 | 0.67185 | 3.6256 | 8.2951 | 17.0895 |
| 7                                                                                                                   | 3.306(3) | .. | C(4)b  | [-1/2+x, 1/2-y, 1-z | =         | 3456.01] |       | -126.16 | -54.85 | 0.63990 | 0.20242 | 0.56947 | 3.2089 | 3.7827 | 14.4853 |
| 8                                                                                                                   | 3.389(3) | .. | C(19)a | [-1+x, y, z         | =         | 1455.01] |       | -176.73 | 29.41  | 0.27600 | 0.27564 | 0.74116 | 1.3841 | 5.1510 | 18.8525 |
| 9                                                                                                                   | 3.457(2) | .. | O(5)a  | [-1+x, y, z         | =         | 1455.01] |       | 162.64  | 14.23  | 0.22600 | 0.33814 | 0.70915 | 1.1333 | 6.3189 | 18.0383 |
| 10                                                                                                                  | 3.551(3) | .. | C(24)d | [1-x, -1/2+y, 3/2-z | =         | 4646.01] |       | -100.69 | 29.78  | 0.74980 | 0.12259 | 0.74507 | 3.7600 | 2.2909 | 18.9520 |
| 11                                                                                                                  | 3.593(3) | .. | C(3)b  | [-1/2+x, 1/2-y, 1-z | =         | 3456.01] |       | -132.78 | -32.64 | 0.45400 | 0.16581 | 0.59953 | 2.2767 | 3.0985 | 15.2499 |
| 12                                                                                                                  | 2.48     | << | H(16)  |                     |           |          | Intra | -26.13  | 26.70  | 1.25995 | 0.23250 | 0.71948 | 6.3183 | 4.3448 | 18.3011 |
| 13                                                                                                                  | 2.56     | .< | H(6)b  | [-1/2+x, 1/2-y, 1-z | =         | 3456.01] |       | -130.08 | -66.26 | 0.73158 | 0.24248 | 0.58370 | 3.6687 | 4.5313 | 14.8473 |
| 14                                                                                                                  | 2.70     | .< | H(22)d | [1-x, -1/2+y, 3/2-z | =         | 4646.01] |       | -106.53 | 22.48  | 0.72224 | 0.15668 | 0.71630 | 3.6218 | 2.9279 | 18.2202 |
| 15                                                                                                                  | 2.79     | .. | H(14)  |                     |           |          | Intra | -8.23   | 59.17  | 1.14569 | 0.27370 | 0.76983 | 5.7453 | 5.1147 | 19.5818 |
| 16                                                                                                                  | 2.89     | .. | H(15)a | [-1+x, y, z         | =         | 1455.01] |       | -176.71 | 44.89  | 0.45638 | 0.27836 | 0.75587 | 2.2886 | 5.2018 | 19.2267 |
| 17                                                                                                                  | 2.91     | .. | H(12)  |                     |           |          | Intra | 121.58  | -6.95  | 0.56210 | 0.41633 | 0.66189 | 2.8188 | 7.7801 | 16.8362 |
| 18                                                                                                                  | 3.01     | .. | H(3)   |                     |           |          | Intra | 105.19  | -51.66 | 0.76613 | 0.38116 | 0.58283 | 3.8419 | 7.1229 | 14.8252 |
| 19                                                                                                                  | 3.15     | .. | H(5)b  | [-1/2+x, 1/2-y, 1-z | =         | 3456.01] |       | -139.59 | -19.65 | 0.41339 | 0.18175 | 0.63408 | 2.0730 | 3.3964 | 16.1288 |
| 20                                                                                                                  | 3.19     | .. | H(11)  |                     |           |          | Intra | 65.00   | -9.61  | 1.12845 | 0.43696 | 0.65482 | 5.6588 | 8.1656 | 16.6563 |
| 21                                                                                                                  | 3.37     | .. | H(16)a | [-1+x, y, z         | =         | 1455.01] |       | -162.16 | 19.28  | 0.25995 | 0.23250 | 0.71948 | 1.3036 | 4.3448 | 18.3011 |
| 22                                                                                                                  | 3.52     | .. | H(5)c  | [1/2+x, 1/2-y, 1-z  | =         | 3556.01] |       | -34.90  | -17.50 | 1.41339 | 0.18175 | 0.63408 | 7.0877 | 3.3964 | 16.1288 |

Angles (Degrees) At1...V...At2 with Vertex V = O(4)

|       |   |        |            |        |   |        |            |        |   |        |            |        |   |        |            |
|-------|---|--------|------------|--------|---|--------|------------|--------|---|--------|------------|--------|---|--------|------------|
| C(18) | , | O(5)   | 28.96(11)  | C(18)  | , | C(16)  | 31.58(11)  | C(18)  | , | C(19)  | 61.88(13)  | C(18)  | , | N(1)   | 56.08(11)  |
| C(18) | , | C(17)  | 51.46(12)  | C(18)  | , | C(4)b  | 129.36(13) | C(18)  | , | C(19)a | 122.31(14) | C(18)  | , | O(5)a  | 108.63(13) |
| C(18) | , | C(24)d | 137.21(14) | C(18)  | , | C(3)b  | 151.20(13) | O(5)   | , | C(16)  | 60.53(7)   | O(5)   | , | C(19)  | 32.93(8)   |
| O(5)  | , | N(1)   | 82.80(7)   | O(5)   | , | C(17)  | 76.43(7)   | O(5)   | , | C(4)b  | 142.46(9)  | O(5)   | , | C(19)a | 122.74(8)  |
| O(5)  | , | O(5)a  | 121.84(7)  | O(5)   | , | C(24)d | 108.82(8)  | O(5)   | , | C(3)b  | 160.73(9)  | C(16)  | , | C(19)  | 93.43(9)   |
| C(16) | , | N(1)   | 30.21(5)   | C(16)  | , | C(17)  | 29.41(6)   | C(16)  | , | C(4)b  | 106.80(7)  | C(16)  | , | C(19)a | 111.56(9)  |
| C(16) | , | O(5)a  | 89.74(7)   | C(16)  | , | C(24)d | 165.71(8)  | C(16)  | , | C(3)b  | 123.93(8)  | C(19)  | , | N(1)   | 113.97(9)  |
| C(19) | , | C(17)  | 105.13(8)  | C(19)  | , | C(4)b  | 138.28(9)  | C(19)  | , | C(19)a | 111.44(8)  | C(19)  | , | O(5)a  | 125.70(8)  |
| C(19) | , | C(24)d | 76.13(8)   | C(19)  | , | C(3)b  | 138.00(8)  | N(1)   | , | C(17)  | 48.02(5)   | N(1)   | , | C(4)b  | 76.88(6)   |
| N(1)  | , | C(19)a | 118.74(8)  | N(1)   | , | O(5)a  | 94.46(6)   | N(1)   | , | C(24)d | 164.05(7)  | N(1)   | , | C(3)b  | 95.92(6)   |
| C(17) | , | C(4)b  | 110.32(7)  | C(17)  | , | C(19)a | 82.15(7)   | C(17)  | , | O(5)a  | 60.87(5)   | C(17)  | , | C(24)d | 143.93(8)  |
| C(17) | , | C(3)b  | 116.85(7)  | C(4)b  | , | C(19)a | 94.76(8)   | C(4)b  | , | O(5)a  | 91.22(7)   | C(4)b  | , | C(24)d | 87.42(6)   |
| C(4)b | , | C(3)b  | 22.69(5)   | C(19)a | , | O(5)a  | 24.35(5)   | C(19)a | , | C(24)d | 64.77(7)   | C(19)a | , | C(3)b  | 74.74(7)   |
| O(5)a | , | C(24)d | 88.60(7)   | O(5)a  | , | C(3)b  | 77.42(6)   | C(24)d | , | C(3)b  | 69.44(6)   |        |   |        |            |

Angles (Degrees) At1...V...At2 with Vertex V = 0(5)

|         |   |         |              |         |   |        |              |         |   |         |              |         |   |         |              |
|---------|---|---------|--------------|---------|---|--------|--------------|---------|---|---------|--------------|---------|---|---------|--------------|
| C(18)   | , | C(19)   | 115. 67 (17) | C(18)   | , | O(4)   | 26. 05 (9)   | C(18)   | , | C(16)   | 37. 32 (10)  | C(18)   | , | C(17) a | 118. 23 (12) |
| C(18)   | , | C(17)   | 40. 86 (10)  | C(18)   | , | S(1)   | 64. 59 (10)  | C(18)   | , | S(1) a  | 139. 88 (12) | C(18)   | , | N(1)    | 33. 47 (10)  |
| C(18)   | , | O(4) a  | 127. 08 (12) | C(19)   | , | O(4)   | 89. 64 (13)  | C(19)   | , | C(16)   | 152. 84 (15) | C(19)   | , | C(17) a | 120. 78 (13) |
| C(19)   | , | C(17)   | 140. 23 (13) | C(19)   | , | S(1)   | 120. 12 (13) | C(19)   | , | S(1) a  | 104. 38 (12) | C(19)   | , | N(1)    | 142. 25 (13) |
| C(19)   | , | O(4) a  | 75. 19 (12)  | O(4)    | , | C(16)  | 63. 37 (7)   | O(4)    | , | C(17) a | 139. 98 (8)  | O(4)    | , | C(17)   | 62. 89 (6)   |
| O(4)    | , | S(1)    | 77. 64 (6)   | O(4)    | , | S(1) a | 165. 92 (7)  | O(4)    | , | N(1)    | 56. 88 (6)   | O(4)    | , | O(4) a  | 121. 84 (7)  |
| C(16)   | , | C(17) a | 84. 85 (7)   | C(16)   | , | C(17)  | 23. 83 (6)   | C(16)   | , | S(1)    | 54. 10 (5)   | C(16)   | , | S(1) a  | 102. 56 (7)  |
| C(16)   | , | N(1)    | 19. 86 (5)   | C(16)   | , | O(4) a | 120. 50 (8)  | C(17) a | , | C(17)   | 97. 67 (6)   | C(17) a | , | S(1)    | 103. 89 (5)  |
| C(17) a | , | S(1) a  | 31. 04 (3)   | C(17) a | , | N(1)   | 84. 86 (5)   | C(17) a | , | O(4) a  | 53. 65 (5)   | C(17)   | , | S(1)    | 30. 96 (3)   |
| C(17)   | , | S(1) a  | 104. 19 (5)  | C(17)   | , | N(1)   | 41. 99 (4)   | C(17)   | , | O(4) a  | 143. 08 (6)  | S(1)    | , | S(1) a  | 93. 85 (4)   |
| S(1)    | , | N(1)    | 72. 93 (4)   | S(1)    | , | O(4) a | 157. 02 (5)  | S(1) a  | , | N(1)    | 110. 09 (5)  | S(1) a  | , | O(4) a  | 64. 47 (4)   |
| N(1)    | , | O(4) a  | 106. 17 (5)  |         |   |        |              |         |   |         |              |         |   |         |              |

| Nr | d(I, J) | To | Atom J | Symm Oper. on Atom J | ARU(J) | Type | Phi | Mu | X | Y | Z | X0 | Y0 | Z0 |
|----|---------|----|--------|----------------------|--------|------|-----|----|---|---|---|----|----|----|
|----|---------|----|--------|----------------------|--------|------|-----|----|---|---|---|----|----|----|

Angles (Degrees) At1...V...At2 with Vertex V = 0(6)

|                 |           |                 |           |                 |           |                 |            |
|-----------------|-----------|-----------------|-----------|-----------------|-----------|-----------------|------------|
| C(20) , N(2)    | 29.59(10) | C(20) , C(10)   | 33.26(10) | C(20) , C(21)   | 61.00(11) | C(20) , O(2)    | 63.64(11)  |
| C(20) , C(22)   | 81.41(11) | C(20) , C(11)   | 42.77(10) | C(20) , C(9)    | 46.61(10) | C(20) , C(11) a | 114.58(12) |
| C(20) , C(8)    | 56.54(11) | N(2) , C(10)    | 62.81(7)  | N(2) , C(21)    | 31.52(6)  | N(2) , O(2)     | 73.19(6)   |
| N(2) , C(22)    | 53.89(6)  | N(2) , C(11)    | 68.06(6)  | N(2) , C(9)     | 74.07(6)  | N(2) , C(11) a  | 134.67(7)  |
| N(2) , C(8)     | 75.62(6)  | C(10) , C(21)   | 94.26(7)  | C(10) , O(2)    | 63.41(6)  | C(10) , C(22)   | 111.87(8)  |
| C(10) , C(11)   | 22.78(6)  | C(10) , C(9)    | 22.92(6)  | C(10) , C(11) a | 89.46(7)  | C(10) , C(8)    | 46.18(6)   |
| C(21) , O(2)    | 84.47(6)  | C(21) , C(22)   | 30.20(5)  | C(21) , C(11)   | 97.86(7)  | C(21) , C(9)    | 102.63(6)  |
| C(21) , C(11) a | 140.31(7) | C(21) , C(8)    | 95.71(6)  | O(2) , C(22)    | 114.13(6) | O(2) , C(11)    | 86.18(5)   |
| O(2) , C(9)     | 44.73(4)  | O(2) , C(11) a  | 62.12(5)  | O(2) , C(8)     | 19.86(4)  | C(22) , C(11)   | 104.46(7)  |
| C(22) , C(9)    | 127.73(7) | C(22) , C(11) a | 154.55(7) | C(22) , C(8)    | 125.74(6) | C(11) , C(9)    | 43.72(5)   |
| C(11) , C(11) a | 100.44(6) | C(11) , C(8)    | 68.45(5)  | C(9) , C(11) a  | 69.30(5)  | C(9) , C(8)     | 25.37(4)   |
| C(11) a , C(8)  | 59.85(5)  |                 |           |                 |           |                 |            |

| 3.6 Angstrom Coordination Sphere Around Atom I = O(7) [ARU = 1555.01] 0.16140 0.56930 0.65940 0.8094 10.6387 16.7728 |             |    |         |             |           |          |       |         |        |          |         |         |         |         |         |
|----------------------------------------------------------------------------------------------------------------------|-------------|----|---------|-------------|-----------|----------|-------|---------|--------|----------|---------|---------|---------|---------|---------|
| Nr                                                                                                                   | d(I, J)     | To | Atom J  | Symm_Oper.  | on Atom J | ARU(J)   | Type  | Phi     | Mu     | X        | Y       | Z       | X0      | Y0      | Z0      |
| 1                                                                                                                    | 1.209 (2)   | -- | C(23)   |             |           |          | Intra | 46.19   | 5.60   | 0.32750  | 0.61577 | 0.66404 | 1.6423  | 11.5071 | 16.8909 |
| 2                                                                                                                    | 2.2461 (19) | << | O(8)    |             |           |          | Intra | 50.54   | 34.14  | 0.39700  | 0.64610 | 0.70896 | 1.9908  | 12.0739 | 18.0335 |
| 3                                                                                                                    | 2.412 (2)   | << | C(21)   |             |           |          | Intra | 42.69   | -25.44 | 0.48060  | 0.64832 | 0.61868 | 2.4101  | 12.1154 | 15.7371 |
| 4                                                                                                                    | 2.664 (2)   | << | C(24)   |             |           |          | Intra | 65.91   | 65.82  | 0.25020  | 0.62259 | 0.75493 | 1.2547  | 11.6345 | 19.2028 |
| 5                                                                                                                    | 2.687 (2)   | << | N(2)    |             |           |          | Intra | 36.21   | -57.65 | 0.39270  | 0.61475 | 0.57017 | 1.9693  | 11.4880 | 14.5031 |
| 6                                                                                                                    | 3.214 (2)   | .< | C(16) a | [-1+x, y, z | =         | 1455.01] |       | -107.60 | -4.21  | -0.03190 | 0.40581 | 0.65013 | -0.1600 | 7.5835  | 16.5370 |
| 7                                                                                                                    | 3.229 (2)   | .. | C(17) a | [-1+x, y, z | =         | 1455.01] |       | -133.17 | 5.63   | -0.27700 | 0.44389 | 0.67185 | -1.3891 | 8.2951  | 17.0895 |
| 8                                                                                                                    | 3.493 (2)   | .. | C(22)   |             |           |          | Intra | 64.10   | -17.49 | 0.45160  | 0.72966 | 0.61812 | 2.2646  | 13.6354 | 15.7228 |
| 9                                                                                                                    | 2.34        | << | H(4)    |             |           |          | Intra | 36.57   | -76.18 | 0.25072  | 0.58708 | 0.57024 | 1.2573  | 10.9709 | 14.5049 |
| 10                                                                                                                   | 2.46        | << | H(21)   |             |           |          | Intra | 118.29  | 64.10  | 0.05972  | 0.61999 | 0.74650 | 0.2995  | 11.5859 | 18.9883 |
| 11                                                                                                                   | 2.48        | << | H(11) a | [-1+x, y, z | =         | 1455.01] |       | -93.82  | -2.69  | 0.12845  | 0.43696 | 0.65482 | 0.6441  | 8.1656  | 16.6563 |
| 12                                                                                                                   | 2.69        | .< | H(13) a | [-1+x, y, z | =         | 1455.01] |       | -147.37 | -2.27  | -0.29067 | 0.49163 | 0.65520 | -1.4576 | 9.1872  | 16.6660 |
| 13                                                                                                                   | 2.81        | .. | H(20)   |             |           |          | Intra | 8.23    | 74.06  | 0.31375  | 0.57521 | 0.76568 | 1.5734  | 10.7491 | 19.4762 |
| 14                                                                                                                   | 2.90        | .. | H(17) a | [-1+x, y, z | =         | 1455.01] |       | 152.72  | -18.29 | -0.32630 | 0.63678 | 0.62365 | -1.6363 | 11.8997 | 15.8635 |
| 15                                                                                                                   | 3.00        | .. | H(17)   |             |           |          | Intra | 26.14   | -17.63 | 0.67370  | 0.63678 | 0.62365 | 3.3784  | 11.8997 | 15.8635 |
| 16                                                                                                                   | 3.01        | .. | H(1) a  | [-1+x, y, z | =         | 1455.01] |       | -133.80 | 47.76  | -0.11807 | 0.49110 | 0.74706 | -0.5921 | 9.1773  | 19.0026 |
| 17                                                                                                                   | 3.11        | .. | H(13)   |             |           |          | Intra | -27.84  | -1.97  | 0.70933  | 0.49163 | 0.65520 | 3.5571  | 9.1872  | 16.6660 |
| 18                                                                                                                   | 3.49        | .. | H(12)   |             |           |          | Intra | -54.90  | 1.04   | 0.56210  | 0.41633 | 0.66189 | 2.8188  | 7.7801  | 16.8362 |

Angles (Degrees) At1...V...At2 with Vertex V = O(7)

|       |   |        |            |        |   |        |            |        |   |        |           |        |   |        |           |
|-------|---|--------|------------|--------|---|--------|------------|--------|---|--------|-----------|--------|---|--------|-----------|
| C(23) | , | O(8)   | 28.82(10)  | C(23)  | , | C(21)  | 31.22(10)  | C(23)  | , | C(24)  | 61.79(11) | C(23)  | , | N(2)   | 63.77(11) |
| C(23) | , | C(16)a | 153.86(13) | C(23)  | , | C(17)a | 168.75(12) | C(23)  | , | C(22)  | 29.09(10) | O(8)   | , | C(21)  | 60.04(6)  |
| O(8)  | , | C(24)  | 32.98(7)   | O(8)   | , | N(2)   | 92.58(7)   | O(8)   | , | C(16)a | 143.83(7) | O(8)   | , | C(17)a | 140.07(7) |
| O(8)  | , | C(22)  | 53.23(5)   | C(21)  | , | C(24)  | 92.98(8)   | C(21)  | , | N(2)   | 32.54(6)  | C(21)  | , | C(16)a | 138.66(7) |
| C(21) | , | C(17)a | 159.80(7)  | C(21)  | , | C(22)  | 21.41(5)   | C(24)  | , | N(2)   | 125.47(8) | C(24)  | , | C(16)a | 118.21(7) |
| C(24) | , | C(17)a | 107.20(8)  | C(24)  | , | C(22)  | 83.33(7)   | N(2)   | , | C(16)a | 111.64(6) | N(2)   | , | C(17)a | 127.32(6) |
| N(2)  | , | C(22)  | 45.17(5)   | C(16)a | , | C(17)a | 27.36(5)   | C(16)a | , | C(22)  | 156.80(6) | C(17)a | , | C(22)  | 159.37(7) |

| 3.6 Angstrom Coordination Sphere Around Atom I = O(8) [ARU = 1555.01] 0.39700 0.64610 0.70896 1.9908 12.0739 18.0335 |            |    |        |                    |            |        |       |        |        |         |         |         |        |         |         |
|----------------------------------------------------------------------------------------------------------------------|------------|----|--------|--------------------|------------|--------|-------|--------|--------|---------|---------|---------|--------|---------|---------|
| Nr                                                                                                                   | d(I, J)    | To | Atom J | Symm_Oper.         | on Atom J  | ARU(J) | Type  | Phi    | Mu     | X       | Y       | Z       | X0     | Y0      | Z0      |
| 1                                                                                                                    | 1.322(2)   | -- | C(23)  |                    |            |        | Intra | 121.59 | -59.79 | 0.32750 | 0.61577 | 0.66404 | 1.6423 | 11.5071 | 16.8909 |
| 2                                                                                                                    | 1.450(3)   | -- | C(24)  |                    |            |        | Intra | 149.17 | 53.75  | 0.25020 | 0.62259 | 0.75493 | 1.2547 | 11.6345 | 19.2028 |
| 3                                                                                                                    | 2.2461(19) | << | O(7)   |                    |            |        | Intra | 129.46 | -34.14 | 0.16140 | 0.56930 | 0.65940 | 0.8094 | 10.6387 | 16.7728 |
| 4                                                                                                                    | 2.335(2)   | << | C(21)  |                    |            |        | Intra | 5.65   | -79.60 | 0.48060 | 0.64832 | 0.61868 | 2.4101 | 12.1154 | 15.7371 |
| 5                                                                                                                    | 2.802(2)   | << | C(22)  |                    |            |        | Intra | 80.05  | -55.55 | 0.45160 | 0.72966 | 0.61812 | 2.2646 | 13.6354 | 15.7228 |
| 6                                                                                                                    | 3.187(3)   | .< | C(19)b | [2-x, 1/2+y, 3/2-z | = 4756.01] |        |       | 55.89  | 23.46  | 0.72400 | 0.77564 | 0.75884 | 3.6307 | 14.4946 | 19.3022 |
| 7                                                                                                                    | 3.4342(14) | .. | S(2)   |                    |            |        | Intra | 123.85 | -41.23 | 0.11009 | 0.76088 | 0.61998 | 0.5521 | 14.2188 | 15.7701 |
| 8                                                                                                                    | 3.579(2)   | .. | N(2)   |                    |            |        | Intra | -92.11 | -80.57 | 0.39270 | 0.61475 | 0.57017 | 1.9693 | 11.4880 | 14.5031 |
| 9                                                                                                                    | 2.00       | << | H(21)  |                    |            |        | Intra | 163.91 | 28.48  | 0.05972 | 0.61999 | 0.74650 | 0.2995 | 11.5859 | 18.9883 |
| 10                                                                                                                   | 2.00       | << | H(20)  |                    |            |        | Intra | 107.49 | 46.09  | 0.31375 | 0.57521 | 0.76568 | 1.5734 | 10.7491 | 19.4762 |
| 11                                                                                                                   | 2.00       | << | H(22)  |                    |            |        | Intra | 161.70 | 71.67  | 0.27776 | 0.65668 | 0.78370 | 1.3929 | 12.2716 | 19.9346 |
| 12                                                                                                                   | 2.58       | .< | H(19)  |                    |            |        | Intra | 68.62  | -36.40 | 0.54800 | 0.74958 | 0.64876 | 2.7481 | 14.0076 | 16.5022 |
| 13                                                                                                                   | 2.58       | .< | H(17)  |                    |            |        | Intra | -7.15  | -57.20 | 0.67370 | 0.63678 | 0.62365 | 3.3784 | 11.8997 | 15.8635 |
| 14                                                                                                                   | 2.73       | .. | H(15)b | [2-x, 1/2+y, 3/2-z | = 4756.01] |        |       | 73.43  | 19.13  | 0.54362 | 0.77836 | 0.74413 | 2.7261 | 14.5454 | 18.9281 |
| 15                                                                                                                   | 2.98       | .. | H(16)b | [2-x, 1/2+y, 3/2-z | = 4756.01] |        |       | 43.18  | 37.65  | 0.74005 | 0.73250 | 0.78052 | 3.7111 | 13.6884 | 19.8537 |
| 16                                                                                                                   | 3.35       | .. | H(14)b | [2-x, 1/2+y, 3/2-z | = 4756.01] |        |       | 46.12  | 9.26   | 0.85431 | 0.77370 | 0.73017 | 4.2841 | 14.4584 | 18.5730 |
| 17                                                                                                                   | 3.49       | .. | H(21)a | [1+x, y, z         | = 1655.01] |        |       | -8.35  | 15.87  | 1.05972 | 0.61999 | 0.74650 | 5.3142 | 11.5859 | 18.9883 |
| 18                                                                                                                   | 3.56       | .. | H(13)  |                    |            |        | Intra | -61.52 | -22.61 | 0.70933 | 0.49163 | 0.65520 | 3.5571 | 9.1872  | 16.6660 |

Angles (Degrees) At1...V...At2 with Vertex V = O(8)

|       |   |        |            |        |   |       |            |        |   |        |           |       |   |        |            |
|-------|---|--------|------------|--------|---|-------|------------|--------|---|--------|-----------|-------|---|--------|------------|
| C(23) | , | C(24)  | 115.67(16) | C(23)  | , | O(7)  | 26.16(9)   | C(23)  | , | C(21)  | 37.34(10) | C(23) | , | C(22)  | 63.39(10)  |
| C(23) | , | C(19)b | 143.63(12) | C(23)  | , | S(2)  | 65.66(9)   | C(23)  | , | N(2)   | 22.45(9)  | C(24) | , | O(7)   | 89.54(12)  |
| C(24) | , | C(21)  | 152.85(14) | C(24)  | , | C(22) | 152.06(14) | C(24)  | , | C(19)b | 99.81(12) | C(24) | , | S(2)   | 120.54(13) |
| C(24) | , | N(2)   | 137.98(12) | O(7)   | , | C(21) | 63.50(7)   | O(7)   | , | C(22)  | 86.83(7)  | O(7)  | , | C(19)b | 168.34(8)  |
| O(7)  | , | S(2)   | 78.98(5)   | O(7)   | , | N(2)  | 48.59(5)   | C(21)  | , | C(22)  | 33.02(6)  | C(21) | , | C(19)b | 106.60(8)  |
| C(21) | , | S(2)   | 54.26(5)   | C(21)  | , | N(2)  | 14.92(5)   | C(22)  | , | C(19)b | 81.65(7)  | C(22) | , | S(2)   | 31.73(4)   |
| C(22) | , | N(2)   | 43.81(5)   | C(19)b | , | S(2)  | 90.20(6)   | C(19)b | , | N(2)   | 121.34(7) | S(2)  | , | N(2)   | 56.60(3)   |



| 3.6 Angstrom Coordination Sphere Around Atom I = N(1) [ARU = 1555.01] 0.92720 0.39175 0.59414 4.6496 7.3207 15.1128 |            |    |        |                     |           |          |       |         |        |         |         |         |        |        |         |
|---------------------------------------------------------------------------------------------------------------------|------------|----|--------|---------------------|-----------|----------|-------|---------|--------|---------|---------|---------|--------|--------|---------|
| Nr                                                                                                                  | d(I, J)    | To | Atom J | Symm_Oper.          | on Atom J | ARU(J)   | Type  | Phi     | Mu     | X       | Y       | Z       | X0     | Y0     | Z0      |
| 1                                                                                                                   | 0.88       | -- | H(3)   |                     |           |          | Intra | 166.23  | -19.08 | 0.76613 | 0.38116 | 0.58283 | 3.8419 | 7.1229 | 14.8252 |
| 2                                                                                                                   | 1.339(2)   | -- | C(15)  |                     |           |          | Intra | 3.00    | -40.93 | 1.12870 | 0.39458 | 0.55965 | 5.6601 | 7.3736 | 14.2355 |
| 3                                                                                                                   | 1.463(2)   | -- | C(16)  |                     |           |          | Intra | 52.02   | 76.83  | 0.96810 | 0.40581 | 0.65013 | 4.8547 | 7.5835 | 16.5370 |
| 4                                                                                                                   | 2.261(2)   | << | O(3)   |                     |           |          | Intra | 5.35    | -14.02 | 1.36280 | 0.40269 | 0.57261 | 6.8340 | 7.5252 | 14.5652 |
| 5                                                                                                                   | 2.419(2)   | << | C(6)   |                     |           |          | Intra | -19.77  | -72.91 | 1.06060 | 0.37888 | 0.50325 | 5.3186 | 7.0802 | 12.8009 |
| 6                                                                                                                   | 2.430(2)   | << | C(17)  |                     |           |          | Intra | 136.42  | 54.43  | 0.72300 | 0.44389 | 0.67185 | 3.6256 | 8.2951 | 17.0895 |
| 7                                                                                                                   | 2.443(2)   | << | C(18)  |                     |           |          | Intra | -68.47  | 62.34  | 1.01020 | 0.33530 | 0.67921 | 5.0659 | 6.2659 | 17.2767 |
| 8                                                                                                                   | 2.8719(19) | .< | O(2)   |                     |           |          | Intra | 97.55   | -34.67 | 0.86530 | 0.51705 | 0.52992 | 4.3392 | 9.6623 | 13.4793 |
| 9                                                                                                                   | 2.890(2)   | .< | O(3) a | [-1+x, y, z         | =         | 1455.01] |       | 175.87  | -10.92 | 0.36280 | 0.40269 | 0.57261 | 1.8193 | 7.5252 | 14.5652 |
| 10                                                                                                                  | 2.901(2)   | .< | O(4)   |                     |           |          | Intra | -99.03  | 45.68  | 0.86380 | 0.28464 | 0.67573 | 4.3317 | 5.3192 | 17.1882 |
| 11                                                                                                                  | 3.154(2)   | .< | C(7)   |                     |           |          | Intra | 114.77  | -80.10 | 0.88190 | 0.41809 | 0.47201 | 4.4225 | 7.8130 | 12.0063 |
| 12                                                                                                                  | 3.283(2)   | .. | C(8)   |                     |           |          | Intra | 113.09  | -53.25 | 0.77360 | 0.48843 | 0.49073 | 3.8794 | 9.1274 | 12.4825 |
| 13                                                                                                                  | 3.431(3)   | .. | C(5)   |                     |           |          | Intra | -45.44  | -56.67 | 1.19090 | 0.31988 | 0.48145 | 5.9720 | 5.9777 | 12.2464 |
| 14                                                                                                                  | 3.436(2)   | .. | O(5)   |                     |           |          | Intra | -33.77  | 58.36  | 1.22600 | 0.33814 | 0.70915 | 6.1480 | 6.3189 | 18.0383 |
| 15                                                                                                                  | 2.03       | << | H(11)  |                     |           |          | Intra | 39.93   | 49.55  | 1.12845 | 0.43696 | 0.65482 | 5.6588 | 8.1656 | 16.6563 |
| 16                                                                                                                  | 2.56       | .< | H(12)  |                     |           |          | Intra | 165.92  | 42.39  | 0.56210 | 0.41633 | 0.66189 | 2.8188 | 7.7801 | 16.8362 |
| 17                                                                                                                  | 2.66       | .< | H(13)  |                     |           |          | Intra | 120.34  | 35.68  | 0.70933 | 0.49163 | 0.65520 | 3.5571 | 9.1872 | 16.6660 |
| 18                                                                                                                  | 2.97       | .. | H(6) b | [-1/2+x, 1/2-y, 1-z | =         | 3456.01] |       | -109.38 | -5.13  | 0.73158 | 0.24248 | 0.58370 | 3.6687 | 4.5313 | 14.8473 |
| 19                                                                                                                  | 3.55       | .. | H(7)   |                     |           |          | Intra | -42.89  | -41.25 | 1.31750 | 0.29446 | 0.50203 | 6.6069 | 5.5027 | 12.7699 |

Angles (Degrees) At1...V...At2 with Vertex V = N(1)

|       |   |       |            |       |   |       |            |       |   |       |            |       |   |       |            |
|-------|---|-------|------------|-------|---|-------|------------|-------|---|-------|------------|-------|---|-------|------------|
| C(15) | , | C(16) | 121.67(16) | C(15) | , | O(3)  | 26.99(10)  | C(15) | , | C(6)  | 33.81(10)  | C(15) | , | C(17) | 146.61(13) |
| C(15) | , | C(18) | 117.95(13) | C(15) | , | O(2)  | 71.14(10)  | C(15) | , | O(3)a | 127.73(12) | C(15) | , | O(4)  | 125.35(12) |
| C(15) | , | C(7)  | 53.33(10)  | C(15) | , | C(8)  | 68.31(10)  | C(15) | , | C(5)  | 34.64(9)   | C(15) | , | O(5)  | 103.90(11) |
| C(16) | , | O(3)  | 94.83(11)  | C(16) | , | C(6)  | 155.47(13) | C(16) | , | C(17) | 36.39(10)  | C(16) | , | C(18) | 36.03(9)   |
| C(16) | , | O(2)  | 115.00(10) | C(16) | , | O(3)a | 108.01(11) | C(16) | , | O(4)  | 56.13(9)   | C(16) | , | C(7)  | 160.26(11) |
| C(16) | , | C(8)  | 135.58(11) | C(16) | , | C(5)  | 146.08(12) | C(16) | , | O(5)  | 33.10(8)   | O(3)  | , | C(6)  | 60.68(7)   |
| O(3)  | , | C(17) | 124.60(9)  | O(3)  | , | C(18) | 95.10(8)   | O(3)  | , | O(2)  | 83.85(7)   | O(3)  | , | O(3)a | 153.35(8)  |
| O(3)  | , | O(4)  | 109.97(8)  | O(3)  | , | C(7)  | 79.45(7)   | O(3)  | , | C(8)  | 89.02(7)   | O(3)  | , | C(5)  | 57.36(6)   |
| O(3)  | , | O(5)  | 79.12(6)   | C(6)  | , | C(17) | 159.05(9)  | C(6)  | , | C(18) | 139.16(9)  | C(6)  | , | O(2)  | 64.36(6)   |
| C(6)  | , | O(3)a | 95.55(7)   | C(6)  | , | O(4)  | 130.21(8)  | C(6)  | , | C(7)  | 25.02(6)   | C(6)  | , | C(8)  | 49.74(6)   |
| C(6)  | , | C(5)  | 19.23(5)   | C(6)  | , | O(5)  | 131.62(8)  | C(17) | , | C(18) | 61.61(7)   | C(17) | , | O(2)  | 95.18(7)   |
| C(17) | , | O(3)a | 73.33(7)   | C(17) | , | O(4)  | 69.42(7)   | C(17) | , | C(7)  | 135.10(8)  | C(17) | , | C(8)  | 109.40(7)  |
| C(17) | , | C(5)  | 177.52(8)  | C(17) | , | O(5)  | 66.93(6)   | C(18) | , | O(2)  | 150.96(8)  | C(18) | , | O(3)a | 111.42(8)  |
| C(18) | , | O(4)  | 24.08(6)   | C(18) | , | C(7)  | 162.22(8)  | C(18) | , | C(8)  | 170.87(8)  | C(18) | , | C(5)  | 120.36(8)  |
| C(18) | , | O(5)  | 17.39(5)   | O(2)  | , | O(3)a | 74.26(6)   | O(2)  | , | O(4)  | 163.28(7)  | O(2)  | , | C(7)  | 45.94(5)   |
| O(2)  | , | C(8)  | 21.59(4)   | O(2)  | , | C(5)  | 83.43(6)   | O(2)  | , | O(5)  | 140.28(6)  | O(3)a | , | O(4)  | 94.42(7)   |
| O(3)a | , | C(7)  | 74.44(6)   | O(3)a | , | C(8)  | 65.13(6)   | O(3)a | , | C(5)  | 104.29(6)  | O(3)a | , | O(5)  | 127.52(6)  |
| O(4)  | , | C(7)  | 143.57(7)  | O(4)  | , | C(8)  | 158.02(7)  | O(4)  | , | C(5)  | 111.71(6)  | O(4)  | , | O(5)  | 40.32(5)   |
| C(7)  | , | C(8)  | 26.85(4)   | C(7)  | , | C(5)  | 42.76(5)   | C(7)  | , | O(5)  | 156.29(7)  | C(8)  | , | C(5)  | 68.68(5)   |

|       |   |       |            |       |   |       |            |
|-------|---|-------|------------|-------|---|-------|------------|
| C (8) | , | O (5) | 160.90 (6) | C (5) | , | O (5) | 115.41 (6) |
|-------|---|-------|------------|-------|---|-------|------------|

| 3.6 Angstrom Coordination Sphere Around Atom I = N(2) [ARU = 1555.01] 0.39270 0.61475 0.57017 1.9693 11.4880 14.5031 |            |    |        |             |            |        |       |         |        |          |         |         |         |         |         |
|----------------------------------------------------------------------------------------------------------------------|------------|----|--------|-------------|------------|--------|-------|---------|--------|----------|---------|---------|---------|---------|---------|
| Nr                                                                                                                   | d(I, J)    | To | Atom J | Symm_Oper.  | on Atom J  | ARU(J) | Type  | Phi     | Mu     | X        | Y       | Z       | X0      | Y0      | Z0      |
| 1                                                                                                                    | 0.88       | -- | H(4)   |             |            |        | Intra | 144.01  | 0.12   | 0.25072  | 0.58708 | 0.57024 | 1.2573  | 10.9709 | 14.5049 |
| 2                                                                                                                    | 1.346(2)   | -- | C(20)  |             |            |        | Intra | 16.93   | -58.35 | 0.52740  | 0.62575 | 0.52513 | 2.6448  | 11.6936 | 13.3575 |
| 3                                                                                                                    | 1.453(2)   | -- | C(21)  |             |            |        | Intra | 54.91   | 58.14  | 0.48060  | 0.64832 | 0.61868 | 2.4101  | 12.1154 | 15.7371 |
| 4                                                                                                                    | 2.269(2)   | << | O(6)   |             |            |        | Intra | 32.49   | -33.69 | 0.71030  | 0.66903 | 0.52069 | 3.5619  | 12.5024 | 13.2445 |
| 5                                                                                                                    | 2.410(2)   | << | C(23)  |             |            |        | Intra | 176.66  | 82.19  | 0.32750  | 0.61577 | 0.66404 | 1.6423  | 11.5071 | 16.8909 |
| 6                                                                                                                    | 2.424(2)   | << | C(10)  |             |            |        | Intra | -71.58  | -75.71 | 0.43040  | 0.58437 | 0.47781 | 2.1583  | 10.9203 | 12.1538 |
| 7                                                                                                                    | 2.487(2)   | << | C(22)  |             |            |        | Intra | 82.17   | 29.37  | 0.45160  | 0.72966 | 0.61812 | 2.2646  | 13.6354 | 15.7228 |
| 8                                                                                                                    | 2.687(2)   | << | O(7)   |             |            |        | Intra | 143.79  | 57.65  | 0.16140  | 0.56930 | 0.65940 | 0.8094  | 10.6387 | 16.7728 |
| 9                                                                                                                    | 3.162(2)   | .. | O(2)   |             |            |        | Intra | -37.61  | -18.89 | 0.86530  | 0.51705 | 0.52992 | 4.3392  | 9.6623  | 13.4793 |
| 10                                                                                                                   | 3.188(2)   | .< | C(11)  |             |            |        | Intra | 177.55  | -73.82 | 0.21570  | 0.61272 | 0.44981 | 1.0817  | 11.4501 | 11.4416 |
| 11                                                                                                                   | 3.3273(16) | .< | S(2)   |             |            |        | Intra | 117.43  | 22.38  | 0.11009  | 0.76088 | 0.61998 | 0.5521  | 14.2188 | 15.7701 |
| 12                                                                                                                   | 3.373(2)   | .. | O(2) a | [-1+x, y, z | = 1455.01] |        |       | -145.38 | -17.67 | -0.13470 | 0.51705 | 0.52992 | -0.6755 | 9.6623  | 13.4793 |
| 13                                                                                                                   | 3.409(2)   | .. | C(9)   |             |            |        | Intra | -64.28  | -55.95 | 0.55790  | 0.52272 | 0.45912 | 2.7977  | 9.7682  | 11.6784 |
| 14                                                                                                                   | 3.579(2)   | .. | O(8)   |             |            |        | Intra | 87.89   | 80.57  | 0.39700  | 0.64610 | 0.70896 | 1.9908  | 12.0739 | 18.0335 |
| 15                                                                                                                   | 2.00       | << | H(17)  |             |            |        | Intra | 16.29   | 42.82  | 0.67370  | 0.63678 | 0.62365 | 3.3784  | 11.8997 | 15.8635 |
| 16                                                                                                                   | 2.63       | .< | H(18)  |             |            |        | Intra | 73.76   | 8.78   | 0.53787  | 0.74852 | 0.58598 | 2.6973  | 13.9878 | 14.9053 |
| 17                                                                                                                   | 2.98       | .. | H(2)   |             |            |        | Intra | 127.25  | 6.14   | 0.03550  | 0.74079 | 0.58269 | 0.1780  | 13.8434 | 14.8216 |
| 18                                                                                                                   | 3.12       | .. | H(8)   |             |            |        | Intra | 152.62  | -60.48 | 0.12084  | 0.65253 | 0.46358 | 0.6060  | 12.1940 | 11.7919 |
| 19                                                                                                                   | 3.31       | .. | H(19)  |             |            |        | Intra | 72.82   | 37.16  | 0.54800  | 0.74958 | 0.64876 | 2.7481  | 14.0076 | 16.5022 |
| 20                                                                                                                   | 3.53       | .. | H(13)  |             |            |        | Intra | -55.39  | 37.73  | 0.70933  | 0.49163 | 0.65520 | 3.5571  | 9.1872  | 16.6660 |

Angles (Degrees) At1...V...At2 with Vertex V = N(2)

|       |   |        |            |       |   |        |            |       |   |        |            |       |   |        |            |
|-------|---|--------|------------|-------|---|--------|------------|-------|---|--------|------------|-------|---|--------|------------|
| C(20) | , | C(21)  | 120.32(15) | C(20) | , | O(6)   | 26.78(9)   | C(20) | , | C(23)  | 155.55(14) | C(20) | , | C(10)  | 34.07(10)  |
| C(20) | , | C(22)  | 103.06(12) | C(20) | , | O(7)   | 169.79(12) | C(20) | , | O(2)   | 55.69(10)  | C(20) | , | C(11)  | 47.47(10)  |
| C(20) | , | S(2)   | 114.37(11) | C(20) | , | O(2) a | 102.58(11) | C(20) | , | C(9)   | 41.39(9)   | C(20) | , | O(8)   | 144.27(12) |
| C(21) | , | O(6)   | 93.73(11)  | C(21) | , | C(23)  | 36.51(9)   | C(21) | , | C(10)  | 154.23(13) | C(21) | , | C(22)  | 34.37(9)   |
| C(21) | , | O(7)   | 63.25(10)  | C(21) | , | O(2)   | 107.27(11) | C(21) | , | C(11)  | 154.87(11) | C(21) | , | S(2)   | 56.73(9)   |
| C(21) | , | O(2) a | 136.85(11) | C(21) | , | C(9)   | 147.98(12) | C(21) | , | O(8)   | 24.44(9)   | O(6)  | , | C(23)  | 129.88(9)  |
| O(6)  | , | C(10)  | 60.82(7)   | O(6)  | , | C(22)  | 78.62(7)   | O(6)  | , | O(7)   | 155.90(8)  | O(6)  | , | O(2)   | 63.42(5)   |
| O(6)  | , | C(11)  | 70.62(6)   | O(6)  | , | S(2)   | 98.24(6)   | O(6)  | , | O(2) a | 128.60(7)  | O(6)  | , | C(9)   | 66.13(6)   |
| O(6)  | , | O(8)   | 118.02(7)  | C(23) | , | C(10)  | 166.53(9)  | C(23) | , | C(22)  | 61.54(7)   | C(23) | , | O(7)   | 26.74(6)   |
| C(23) | , | O(2)   | 115.28(7)  | C(23) | , | C(11)  | 156.04(9)  | C(23) | , | S(2)   | 63.80(5)   | C(23) | , | O(2) a | 101.46(7)  |
| C(23) | , | C(9)   | 149.07(8)  | C(23) | , | O(8)   | 12.09(5)   | C(10) | , | C(22)  | 131.92(9)  | C(10) | , | O(7)   | 141.11(8)  |
| C(10) | , | O(2)   | 59.51(6)   | C(10) | , | C(11)  | 24.25(6)   | C(10) | , | S(2)   | 126.47(7)  | C(10) | , | O(2) a | 68.91(6)   |
| C(10) | , | C(9)   | 19.95(5)   | C(10) | , | O(8)   | 173.64(8)  | C(22) | , | O(7)   | 84.83(7)   | C(22) | , | O(2)   | 124.63(8)  |
| C(22) | , | C(11)  | 120.95(8)  | C(22) | , | S(2)   | 32.36(5)   | C(22) | , | O(2) a | 135.18(8)  | C(22) | , | C(9)   | 144.39(8)  |
| C(22) | , | O(8)   | 51.26(6)   | O(7)  | , | O(2)   | 114.49(6)  | O(7)  | , | C(11)  | 133.42(7)  | O(7)  | , | S(2)   | 75.75(5)   |
| O(7)  | , | O(2) a | 75.33(5)   | O(7)  | , | C(9)   | 130.20(7)  | O(7)  | , | O(8)   | 38.83(4)   | O(2)  | , | C(11)  | 83.73(6)   |
| O(2)  | , | S(2)   | 156.41(6)  | O(2)  | , | O(2) a | 100.19(5)  | O(2)  | , | C(9)   | 42.13(4)   | O(2)  | , | O(8)   | 114.17(5)  |
| C(11) | , | S(2)   | 104.89(5)  | C(11) | , | O(2) a | 58.92(5)   | C(11) | , | C(9)   | 42.77(5)   | C(11) | , | O(8)   | 162.00(7)  |



Search for and Analysis of Solvent Accessible Voids in the Structure - Grid = 0.20 Ang., Probe Radius = 1.20 Ang., NStep = 6

van der Waals (or ion) Radii used in the Analysis

| C    | H    | N    | O    | S    |
|------|------|------|------|------|
| 1.70 | 1.20 | 1.55 | 1.52 | 1.80 |

:: Grid: X-Axis Step = 0.0417 = Points 24, Angstrom Step = 0.21  
:: Grid: Y-Axis Step = 0.0104 = Points 96, Angstrom Step = 0.19  
:: Grid: Z-Axis Step = 0.0076 = Points 132, Angstrom Step = 0.19

:: Unit cell Contains NO Residual Solvent Accessible Void.

:: Note: use CALC VOID (not CALC SOLV) for Packing Index.

Report Expected Number of Independent Reflections for given Symmetry and Resolution.

:: Hmax = 6 Kmax = 24 Lmax= 33 , Sorting Order : Fast H, Medium K, Slow L

:: Actual Theta-Max: 27.480 Deg. ( Applied Theta Limit: 27.480 Deg.)

Space Group H-M: P212121 Laue: mmm

Space Group Hall: P 2ac 2ab [Schoenflies: D2<sup>4</sup> ]

Lattice Type: oP, Acentric, Orthorhombic, Multiplicity: 4( 4), No: 19

CHIRAL - See P.G. Jones, Acta Cryst. (1986), A42, 57.

Nr \*\*\*\*\* Symmetry Operation(s) \*\*\*\*\*

|   |           |           |         |
|---|-----------|-----------|---------|
| 1 | H ,       | K ,       | L       |
| 2 | 1/2 - H , | - K ,     | 1/2 + L |
| 3 | 1/2 + H , | 1/2 - K , | - L     |
| 4 | - H ,     | 1/2 + K , | 1/2 - L |

:: Number of Independent Type H, K, L Reflections = 3184

:: Number of Independent Type -H, -K, -L Reflections = 2292

Table 0 – Crystal Data and Details of the Structure Determination  
for: A-Co P 21 21 21 R = 0.04

### Crystal Data

|                    |                                   |
|--------------------|-----------------------------------|
| Formula            | C24 H22 N2 O8 S2                  |
| Formula Weight     | 530.57                            |
| Crystal System     | orthorhombic                      |
| Space group        | P212121 (No. 19)                  |
| a, b, c [Angstrom] | 5.01471(10) 18.6873(3) 25.4365(6) |
| V [Ang**3]         | 2383.69(8)                        |
| Z                  | 4                                 |
| D(calc) [g/cm**3]  | 1.478                             |
| Mu(MoKa) [ /mm ]   | 0.277                             |
| F(000)             | 1104                              |
| Crystal Size [mm]  | 0.03 x 0.10 x 0.16                |

### Data Collection

|                                  |                           |
|----------------------------------|---------------------------|
| Temperature (K)                  | 123                       |
| Radiation [Angstrom]             | MoKa 0.71075              |
| Theta Min-Max [Deg]              | 3.2, 27.5                 |
| Dataset                          | -6: 6 ; -23: 24 ; -32: 32 |
| Tot., Uniq. Data, R(int)         | 23904, 5463, 0.037        |
| Observed Data [I > 0.0 sigma(I)] | 5041                      |

### Refinement

|                                                                                  |                      |
|----------------------------------------------------------------------------------|----------------------|
| Nref, Npar                                                                       | 5463, 335            |
| R, wR2, S                                                                        | 0.0362, 0.0925, 1.08 |
| $w = \frac{1}{S^2(F_0^2) + (0.0544P)^2 + 0.4090P}$ WHERE $P = (F_0^2 + 2FC^2)/3$ |                      |
| Max. and Av. Shift/Error                                                         | 0.00, 0.00           |
| Flack x                                                                          | 0.00(6)              |
| Min. and Max. Resd. Dens. [e/Ang^3]                                              | -0.25, 0.43          |

=====

\*\*\*\*\* N O T I C E \*\*\*\*\*

=====

- PLATON Reference : Spek, A.L. (2003). J. Appl. Cryst. 36, 7-13.  
Spek, A.L. (2009). Acta Cryst. D65, 148-155.
- Output Values (Esd) may have been set to 99, 999 or 9999 to Avoid Format Overflow
- Derived Parameter SU's (= Esd's) may be Incorrect in Cases where Covariances in the Atom Parameters should have been taken into Account (e.g. Those Involving Atoms That were Refined with Constraints)
- ROUNDING, in particular of the Input Coordinate Data, may give deviating values for derived geometry parameters. However, differences should be within the associated esd-range.
- PLATON is NOT a Finished Program. The Implementation of Additional Options is Planned. Some of the More Advanced Features are Experimental and may Contain Loose Ends.
- The Communication of Glitches Encountered will be Appreciated: E-mail: a.l.spek@uu.nl
- Recent versions of PLATON may be obtained from <http://www.platonsoft.nl/xraysoft>
- More INFO can be found on <http://http://www.platonsoft.nl/>



Page - Index

Page 1 --- GENERAL  
Page 2 --- ADDSYM  
Page 3 --- GEOMETRY  
Page 6 --- MOLSYM  
Page 8 --- NONSYM  
Page 9 --- ADP-Anal  
Page 19 --- GEOMETRY  
Page 45 --- INTER  
Page 61 --- COORDN  
Page 77 --- VOIDS  
Page 78 --- EXPECT  
Page 79 --- SUMMARY

Summary and Remarks : N = NOTE, W = WARNING, E = ERROR

W: NOMOVE option used.  
:: >>> WARNING: 'CONNECTED INPUT SET' is assumed to be TRUE  
:: >>> The Network Analysis may be INCORRECT when this assumption is FALSE

|                                           |   |
|-------------------------------------------|---|
| N: Number of Ignored Lines on INPUT ..... | 2 |
| of which blank in column 1 .....          | 0 |
| N: Number of Non-HBonded D-H atoms .....  | 2 |

:: Input Xtal Data from File revisedcif.cif - Data Type CIF

:: NORMAL END of PLATON : 81 Pages on FILE revisedcif.lis

:: SPF File spf on :revisedcif\_pl.spf
