# Supplementary material for: Synthesis of a Novel Cysteine-Incorporated Anthraquinone Derivative and Its Structural Properties
Source: MDPI journal article supplement (doi:10.3390/molecules200610192), 2015-06-03

## Supplementary Materials

### *Fluorescence spectra of 7.*

Fluorescence spectrum ( $\lambda_{\text{ex}} = 350 \text{ nm}$ )

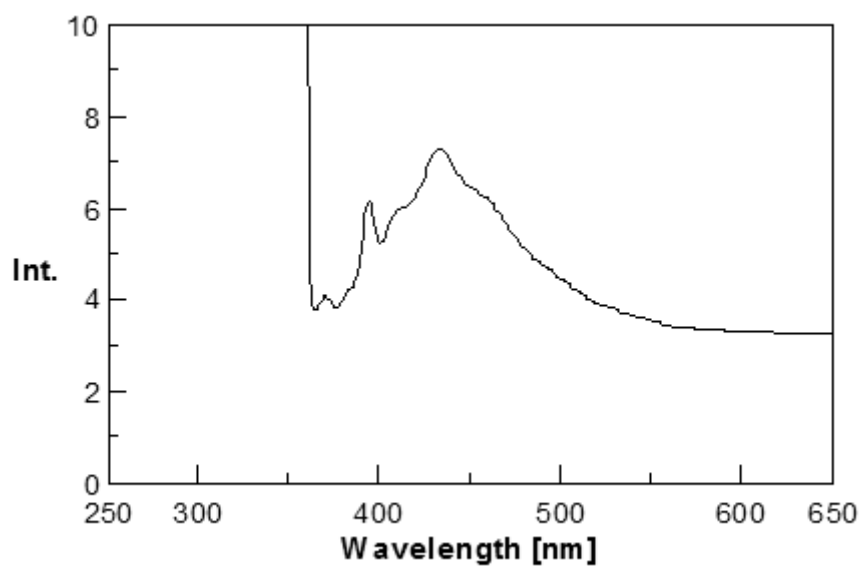

*<sup>1</sup>H- and <sup>13</sup>C-NMR spectra of 7.*

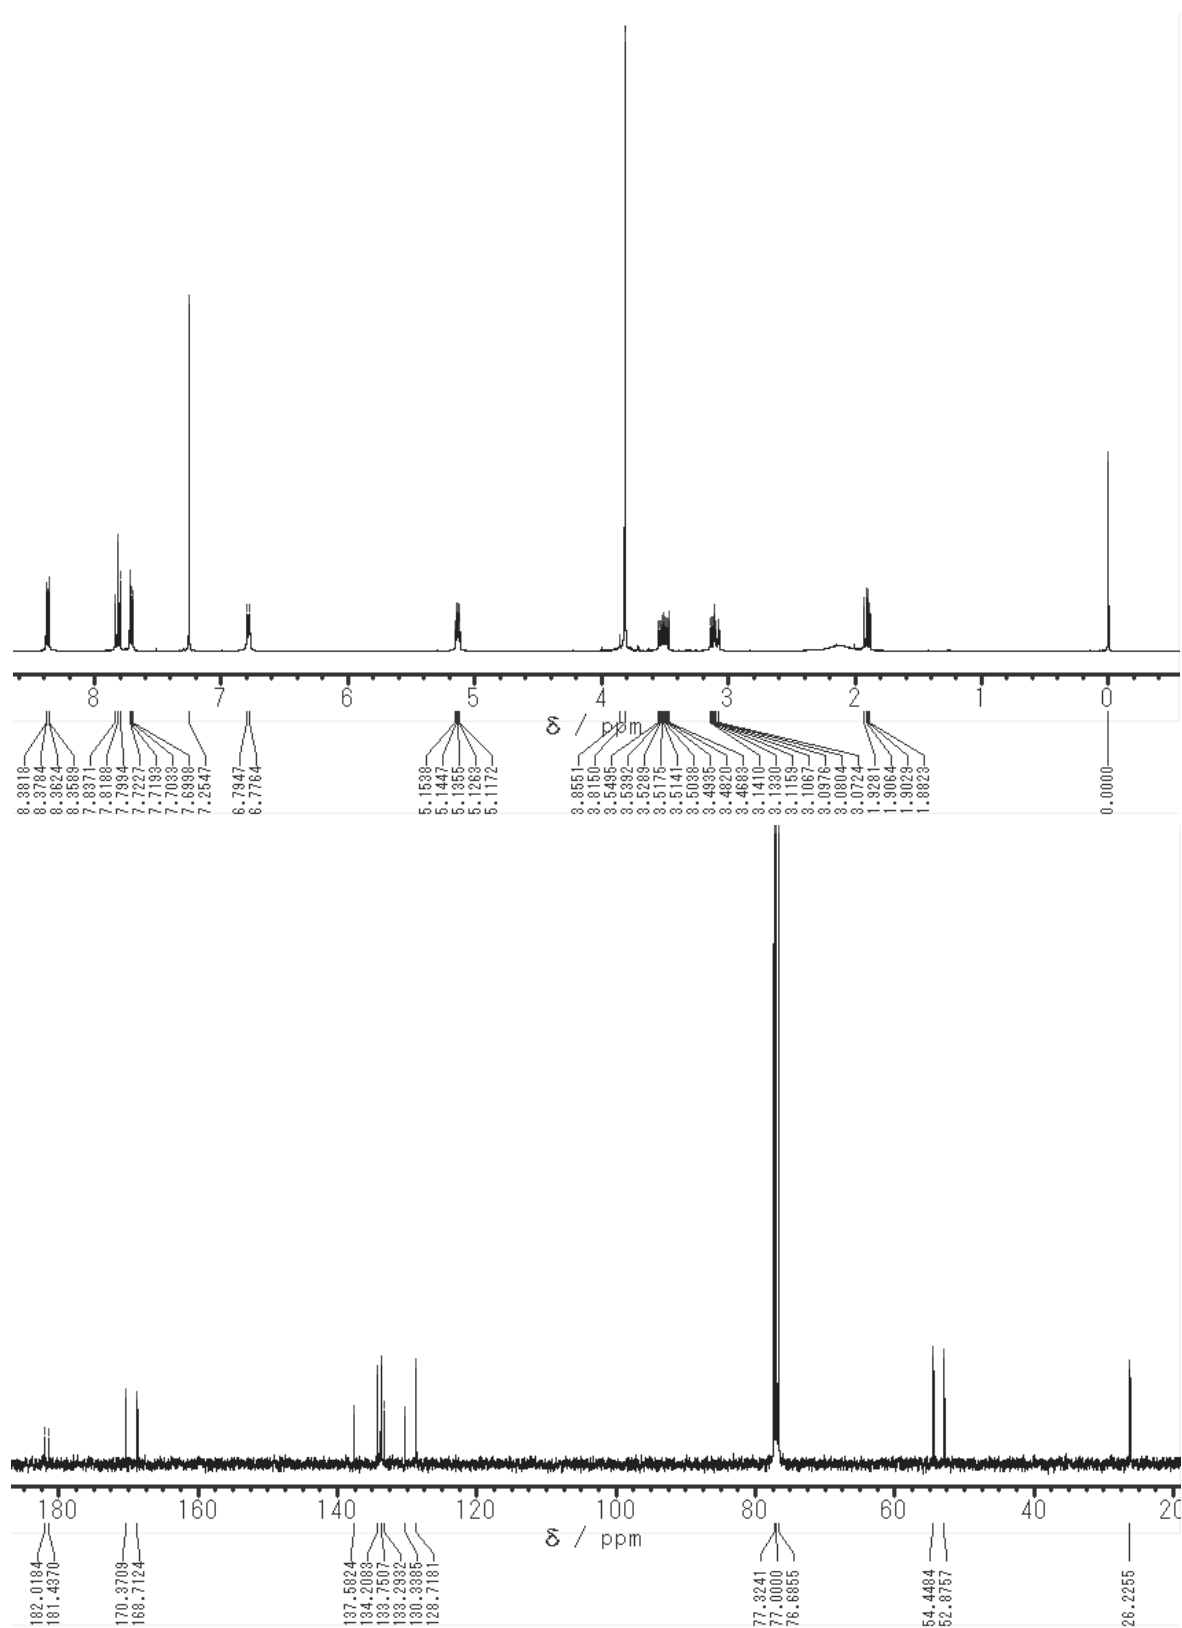

*<sup>1</sup>H- and <sup>13</sup>C-NMR spectra of 10.*

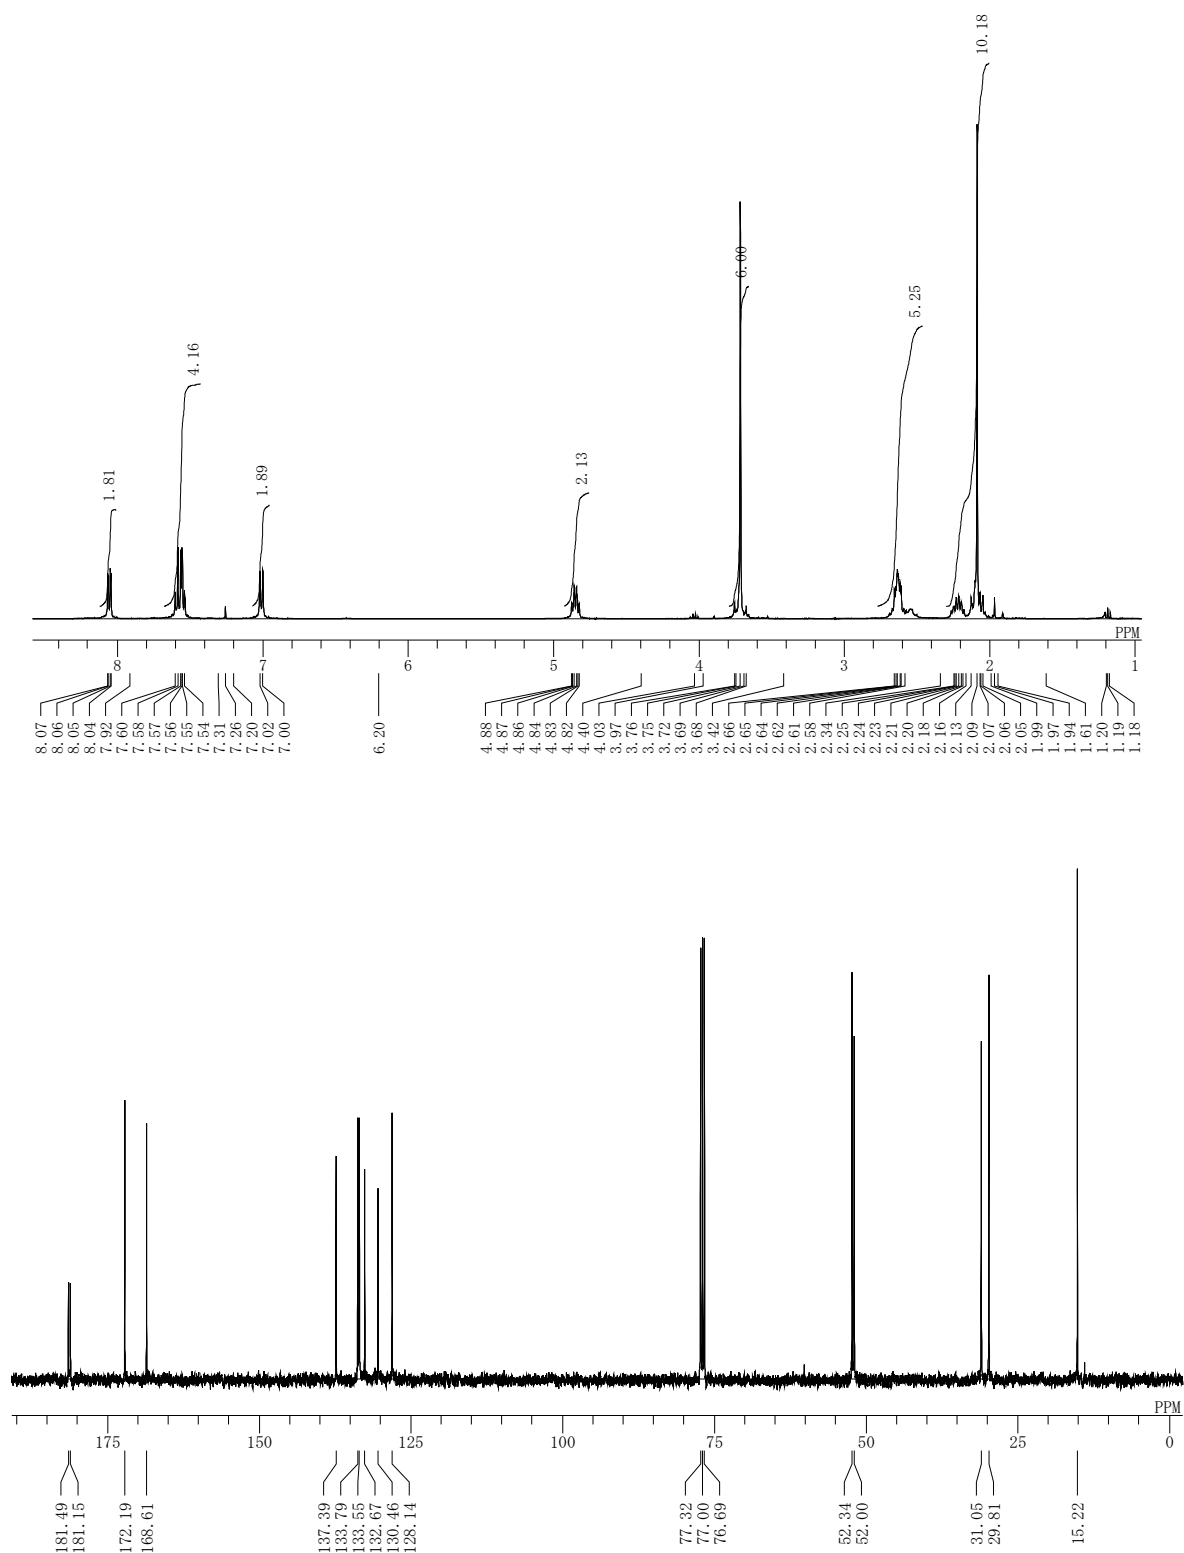

$^1\text{H}$ - and  $^{13}\text{C}$ -NMR spectra of 11.

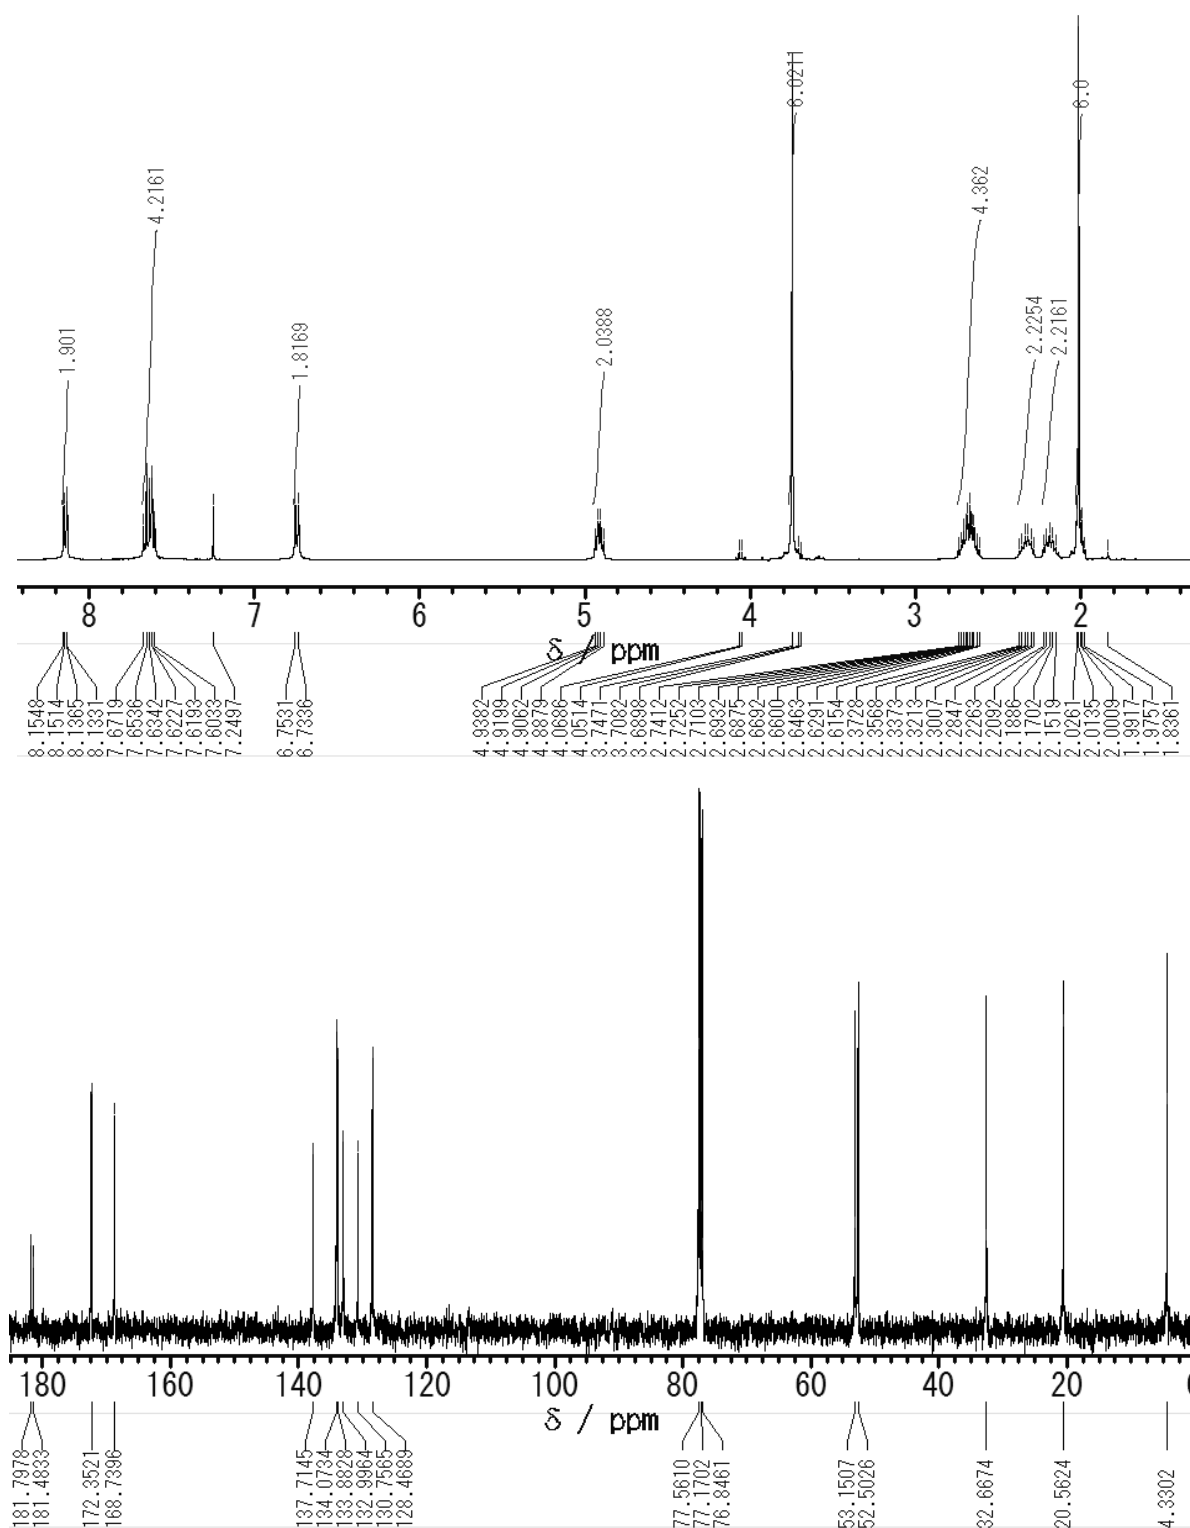

Supplement: s1 [file s1]
