# Supplementary material for: Synthesis of a Novel Cysteine-Incorporated Anthraquinone Derivative and Its Structural Properties
Source: MDPI journal article supplement (doi:10.3390/molecules200610192), 2015-06-03
Supplement: s1 [file s1]

# X-ray Structure Report

for

7

*Experimental*

## Data Collection

A yellow platelet crystal of  $C_{24}H_{22}N_2O_8S_2$  having approximate dimensions of  $0.160 \times 0.100 \times 0.030$  mm was mounted on a glass fiber. All measurements were made on a Rigaku R-Axis RAPID diffractometer using filtered Mo-K $\alpha$  radiation.

The crystal-to-detector distance was 127.40 mm.

Cell constants and an orientation matrix for data collection corresponded to a primitive orthorhombic cell with dimensions:

$$a = 5.01471(10) \text{ \AA}$$

$$b = 18.6873(3) \text{ \AA}$$

$$c = 25.4365(6) \text{ \AA}$$

$$V = 2383.70(8) \text{ \AA}^3$$

For  $Z = 4$  and F.W. = 530.57, the calculated density is 1.478 g/cm<sup>3</sup>. The reflection conditions of:

$$h00: h = 2n$$

$$0k0: k = 2n$$

$$00l: l = 2n$$

uniquely determine the space group to be:

$$P2_12_12_1 \text{ (#19)}$$

The data were collected at a temperature of  $-150 \pm 1$  °C to a maximum  $2\theta$  value of  $55.0^\circ$ . A total of 111 oscillation images were collected. A sweep of data was done using  $\omega$  scans from  $130.0$  to  $190.0^\circ$  in  $2.00^\circ$  step, at  $\chi = 45.0^\circ$  and  $\phi = 0.0^\circ$ . The exposure rate was 40.0 [s/°]. A second sweep was performed using  $\omega$  scans from  $0.0$  to  $162.0^\circ$  in  $2.00^\circ$  step, at  $\chi = 45.0^\circ$  and  $\phi = 180.0^\circ$ . The exposure rate was 40.0 [s/°]. The crystal-to-detector distance was 127.40 mm. Readout was performed in the 0.100 mm pixel mode.

## Data Reduction

Of the 23904 reflections were collected, where 5463 were unique ( $R_{\text{int}} = 0.0368$ ); equivalent reflections were merged.

The linear absorption coefficient,  $\mu$ , for Mo-K $\alpha$  radiation is  $2.771 \text{ cm}^{-1}$ . An empirical absorption correction was applied which resulted in transmission factors ranging from 0.823 to 0.992. The data were corrected for Lorentz and polarization effects.

## Structure Solution and Refinement

The structure was solved by direct methods [1] and expanded using Fourier techniques. The non-hydrogen atoms were refined anisotropically. Hydrogen atoms were refined using the riding model. The final cycle of full-matrix least-squares refinement [2] on  $F^2$  was based on 5463 observed reflections and 335 variable parameters and converged (largest parameter shift was 0.00 times its esd) with unweighted and weighted agreement factors of:

$$R1 = \Sigma ||F_o| - |F_c|| / \Sigma |F_o| = 0.0362$$

$$wR2 = [\Sigma (w (F_o^2 - F_c^2)^2) / \Sigma w(F_o^2)^2]^{1/2} = 0.0925$$

The goodness of fit [3] was 1.08. Unit weights were used. Plots of  $\Sigma w (|F_o| - |F_c|)^2$  vs.  $|F_o|$ , reflection order in data collection,  $\sin \theta/\lambda$  and various classes of indices showed no unusual trends. The maximum and minimum peaks on the final difference Fourier map corresponded to 0.43 and  $-0.25 \text{ e}^-/\text{\AA}^3$ , respectively. The final Flack parameter [4] was  $-0.00(6)$ , indicating that the present absolute structure is correct [5].

Neutral atom scattering factors were taken from International Tables for Crystallography (IT), Vol. C, Table 6.1.1.4 [6]. Anomalous dispersion effects were included in  $F_{\text{calc}}$  [7]; the values for  $\Delta f'$  and  $\Delta f''$  were those of Creagh and McAuley [8]. The values for the mass attenuation coefficients are those of Creagh and Hubbell [9]. All calculations were performed using the CrystalStructure [10] crystallographic software package except for refinement, which was performed using SHELXL97 [11].

## References and Notes

1. **SIR2008**: Burla, M.C.; Caliendo, R.; Camalli, M.; Carrozzini, B.; Cascarano, G.L.; de Caro, L.; Giacovazzo, C.; Polidori, G.; Siliqi, D.; Spagna R. IL MILIONE: A suite of computer programs for crystal structure solution of proteins. *J. Appl. Crystallogr.* **2007**, *40*, 609–613.
2. Least Squares function minimized: (SHELXL97)  
 $\Sigma w(F_o^2 - F_c^2)^2$  where  $w$  = Least Squares weights.
3. Goodness of fit is defined as:

$$[\Sigma w(F_o^2 - F_c^2)^2 / (N_o - N_v)]^{1/2}$$

where:  $N_o$  = number of observations  
 $N_v$  = number of variables

4. Flack, H.D. On enantiomorph-polarity estimation. *Acta Crystallogr.* **1983**, *A39*, 876–881.
5. Flack, H.D.; Bernardinelli, G. Reporting and evaluating absolute-structure and absolute-configuration determinations. *J. Appl. Crystallogr.* **2000**, *33*, 1143–1148.
6. Wilson, A.J.C. Tables 6.1.1.4. In *International Tables for X-ray Crystallography*; Kluwer Academic Publishers: Dordrecht, The Netherlands, 1992; Volume C, pp. 500–502.
7. Ibers, J.A.; Hamilton, W.C. Dispersion corrections and crystal structure refinements. *Acta Crystallogr.* **1964**, *17*, 781–782.
8. Creagh, D.C.; McAuley, W.J. Table 4.2.6.8. In *International Tables for Crystallography*; Wilson, A.J.C., Ed.; Kluwer Academic Publishers: Boston, MA, USA, 1992; Volume C, pp. 219–222.
9. Creagh, D.C.; Hubbell, J.H. Table 4.2.4.3. In *International Tables for Crystallography*; Wilson, A.J.C., Ed.; Kluwer Academic Publishers: Boston, MA, USA, 1992; Volume C, pp. 200–206.
10. *CrystalStructure 4.1*: Crystal Structure Analysis Package; Rigaku Corporation (2000–2014): Tokyo, Japan, 2014.
11. SHELXL97: Sheldrick, G.M. A short history of SHELX. *Acta Crystallogr.* **2008**, *A64*, 112–122.

*Experimental Details*

## A. Crystal Data

|                      |                                                                                            |
|----------------------|--------------------------------------------------------------------------------------------|
| Empirical Formula    | C <sub>24</sub> H <sub>22</sub> N <sub>2</sub> O <sub>8</sub> S <sub>2</sub>               |
| Formula Weight       | 530.57                                                                                     |
| Crystal Color, Habit | yellow, platelet                                                                           |
| Crystal Dimensions   | 0.160 × 0.100 × 0.030 mm                                                                   |
| Crystal System       | orthorhombic                                                                               |
| Lattice Type         | Primitive                                                                                  |
| Lattice Parameters   | a = 5.01471(10) Å<br>b = 18.6873(3) Å<br>c = 25.4365(6) Å<br>V = 2383.70(8) Å <sup>3</sup> |
| Space Group          | P2 <sub>1</sub> 2 <sub>1</sub> 2 <sub>1</sub> (#19)                                        |
| Z value              | 4                                                                                          |
| D <sub>calc</sub>    | 1.478 g/cm <sup>3</sup>                                                                    |
| F <sub>000</sub>     | 1104.00                                                                                    |
| μ(MoKα)              | 2.771 cm <sup>-1</sup>                                                                     |

## B. Intensity Measurements

|                                                               |                                                                                   |
|---------------------------------------------------------------|-----------------------------------------------------------------------------------|
| Diffractometer                                                | R-AXIS RAPID                                                                      |
| Radiation                                                     | MoK $\alpha$ ( $\lambda = 0.71075$ Å)                                             |
| Voltage, Current                                              | 50kV, 24mA                                                                        |
| Temperature                                                   | −150.0 °C                                                                         |
| Detector Aperture                                             | 460.0 × 256.0 mm                                                                  |
| Data Images                                                   | 111 exposures                                                                     |
| $\omega$ oscillation Range ( $\chi = 45.0$ , $\phi = 0.0$ )   | 130.0–190.0°                                                                      |
| Exposure Rate                                                 | 40.0 s/°                                                                          |
| $\omega$ oscillation Range ( $\chi = 45.0$ , $\phi = 180.0$ ) | 0.0–162.0°                                                                        |
| Exposure Rate                                                 | 40.0 s/°                                                                          |
| Detector Position                                             | 127.40 mm                                                                         |
| Pixel Size                                                    | 0.100 mm                                                                          |
| $2\theta_{\max}$                                              | 55.0°                                                                             |
| No. of Reflections Measured                                   | Total: 23904<br>Unique: 5463 ( $R_{\text{int}} = 0.0368$ )<br>Friedel pairs: 2288 |
| Corrections                                                   | Lorentz-polarization<br>Absorption<br>(trans. factors: 0.823–0.992)               |

## C. Structure Solution and Refinement

|                                          |                                                                                                                  |
|------------------------------------------|------------------------------------------------------------------------------------------------------------------|
| Structure Solution                       | Direct Methods (SIR2008)                                                                                         |
| Refinement                               | Full-matrix least-squares on $F^2$                                                                               |
| Function Minimized                       | $\Sigma w (F_o^2 - F_c^2)^2$                                                                                     |
| Least Squares Weights                    | $w = 1/[\sigma^2(F_o^2) + (0.0544 \cdot P)^2 + 0.4090 \cdot P]$<br>where $P = (\text{Max}(F_o^2, 0) + 2F_c^2)/3$ |
| $2\theta_{\text{max}}$ cutoff            | $55.0^\circ$                                                                                                     |
| Anomalous Dispersion                     | All non-hydrogen atoms                                                                                           |
| No. Observations (All reflections)       | 5463                                                                                                             |
| No. Variables                            | 335                                                                                                              |
| Reflection/Parameter Ratio               | 16.31                                                                                                            |
| Residuals: $R_1$ ( $I > 2.00\sigma(I)$ ) | 0.0362                                                                                                           |
| Residuals: $R$ (All reflections)         | 0.0401                                                                                                           |
| Residuals: $wR_2$ (All reflections)      | 0.0925                                                                                                           |
| Goodness of Fit Indicator                | 1.081                                                                                                            |
| Flack Parameter (Friedel pairs = 2288)   | $-0.00(6)$                                                                                                       |
| Max Shift/Error in Final Cycle           | 0.001                                                                                                            |
| Maximum peak in Final Diff. Map          | $0.43 \text{ e}^-/\text{\AA}^3$                                                                                  |
| Minimum peak in Final Diff. Map          | $-0.25 \text{ e}^-/\text{\AA}^3$                                                                                 |

**Table 1.** Atomic coordinates and Biso/B<sub>eq</sub>.

| Atom | x           | y           | z           | B <sub>eq</sub> |
|------|-------------|-------------|-------------|-----------------|
| S1   | 0.72615(12) | 0.45508(3)  | 0.74252(2)  | 2.955(11)       |
| S2   | 0.11009(11) | 0.76088(3)  | 0.61998(2)  | 2.465(10)       |
| O1   | 0.5950(4)   | 0.41462(8)  | 0.34165(5)  | 3.04(3)         |
| O2   | 0.8653(3)   | 0.51705(6)  | 0.52992(5)  | 1.72(2)         |
| O3   | 1.3628(3)   | 0.40269(10) | 0.57261(6)  | 2.86(3)         |
| O4   | 0.8638(4)   | 0.28464(7)  | 0.67573(6)  | 2.89(3)         |
| O5   | 1.2260(3)   | 0.33814(8)  | 0.70915(6)  | 2.61(3)         |
| O6   | 0.7103(3)   | 0.66903(7)  | 0.52069(5)  | 2.02(2)         |
| O7   | 0.1614(3)   | 0.56930(7)  | 0.65940(5)  | 2.36(3)         |
| O8   | 0.3970(3)   | 0.64610(7)  | 0.70896(5)  | 2.50(3)         |
| N1   | 0.9272(3)   | 0.39175(8)  | 0.59414(6)  | 1.42(2)         |
| N2   | 0.3927(3)   | 0.61475(8)  | 0.57017(6)  | 1.69(2)         |
| C1   | 0.6300(4)   | 0.43285(10) | 0.38704(7)  | 1.94(3)         |
| C2   | 0.8268(4)   | 0.39436(9)  | 0.42089(7)  | 1.65(3)         |
| C3   | 0.9540(4)   | 0.33419(10) | 0.40047(8)  | 2.18(3)         |
| C4   | 1.1399(5)   | 0.29758(10) | 0.43053(8)  | 2.36(3)         |
| C5   | 1.1909(4)   | 0.31988(10) | 0.48145(8)  | 2.02(3)         |
| C6   | 1.0606(4)   | 0.37888(9)  | 0.50325(7)  | 1.53(3)         |
| C7   | 0.8819(4)   | 0.41809(9)  | 0.47201(7)  | 1.39(3)         |
| C8   | 0.7736(4)   | 0.48843(9)  | 0.49073(6)  | 1.33(3)         |
| C9   | 0.5579(4)   | 0.52272(9)  | 0.45912(6)  | 1.37(3)         |
| C10  | 0.4304(4)   | 0.58437(9)  | 0.47781(7)  | 1.55(3)         |
| C11  | 0.2157(4)   | 0.61272(10) | 0.44981(7)  | 1.86(3)         |
| C12  | 0.1394(4)   | 0.58322(10) | 0.40194(8)  | 2.11(3)         |
| C13  | 0.2758(4)   | 0.52540(10) | 0.38155(7)  | 1.96(3)         |
| C14  | 0.4829(4)   | 0.49434(10) | 0.41026(7)  | 1.64(3)         |
| C15  | 1.1287(4)   | 0.39458(9)  | 0.55965(7)  | 1.57(3)         |
| C16  | 0.9681(4)   | 0.40581(9)  | 0.65013(7)  | 1.48(3)         |
| C17  | 0.7230(4)   | 0.44389(10) | 0.67185(7)  | 1.92(3)         |
| C18  | 1.0102(4)   | 0.33530(10) | 0.67921(7)  | 1.80(3)         |
| C19  | 1.2760(5)   | 0.27564(15) | 0.74116(10) | 3.64(5)         |
| C20  | 0.5274(4)   | 0.62575(9)  | 0.52513(7)  | 1.58(3)         |
| C21  | 0.4806(4)   | 0.64832(9)  | 0.61868(7)  | 1.70(3)         |
| C22  | 0.4516(4)   | 0.72966(9)  | 0.61812(8)  | 1.89(3)         |
| C23  | 0.3275(4)   | 0.61577(9)  | 0.66404(7)  | 1.74(3)         |
| C24  | 0.2502(6)   | 0.62259(11) | 0.75493(8)  | 2.99(4)         |

$$B_{eq} = 8/3\pi^2(U_{11}(aa^*)^2 + U_{22}(bb^*)^2 + U_{33}(cc^*)^2 + 2U_{12}(aa^*bb^*)\cos\gamma + 2U_{13}(aa^*cc^*)\cos\beta + 2U_{23}(bb^*cc^*)\cos\alpha).$$

**Table 2.** Atomic coordinates and B<sub>iso</sub> involving hydrogen atoms.

| Atom | x        | y       | z       | B <sub>iso</sub> |
|------|----------|---------|---------|------------------|
| H1   | 0.88193  | 0.49110 | 0.74706 | 4.564            |
| H2   | 0.03550  | 0.74079 | 0.58269 | 3.715            |
| H3   | 0.76613  | 0.38116 | 0.58283 | 1.709            |
| H4   | 0.25072  | 0.58708 | 0.57024 | 2.028            |
| H5   | 0.91339  | 0.31825 | 0.36592 | 2.613            |
| H6   | 1.23158  | 0.25752 | 0.41630 | 2.828            |
| H7   | 1.31750  | 0.29446 | 0.50203 | 2.428            |
| H8   | 0.12084  | 0.65253 | 0.46358 | 2.232            |
| H9   | −0.00704 | 0.60294 | 0.38320 | 2.536            |
| H10  | 0.22886  | 0.50678 | 0.34805 | 2.353            |
| H11  | 1.12845  | 0.43696 | 0.65482 | 1.776            |
| H12  | 0.56210  | 0.41633 | 0.66189 | 2.307            |
| H13  | 0.70933  | 0.49163 | 0.65520 | 2.307            |
| H14  | 1.14569  | 0.27370 | 0.76983 | 4.371            |
| H15  | 1.45638  | 0.27836 | 0.75587 | 4.371            |
| H16  | 1.25995  | 0.23250 | 0.71948 | 4.371            |
| H17  | 0.67370  | 0.63678 | 0.62365 | 2.037            |
| H18  | 0.53787  | 0.74852 | 0.58598 | 2.265            |
| H19  | 0.54800  | 0.74958 | 0.64876 | 2.265            |
| H20  | 0.31375  | 0.57521 | 0.76568 | 3.593            |
| H21  | 0.05972  | 0.61999 | 0.74650 | 3.593            |
| H22  | 0.27776  | 0.65668 | 0.78370 | 3.593            |



**Table 3.** Anisotropic displacement parameters

| Atom | U <sub>11</sub> | U <sub>22</sub> | U <sub>33</sub> | U <sub>12</sub> | U <sub>13</sub> | U <sub>23</sub> |
|------|-----------------|-----------------|-----------------|-----------------|-----------------|-----------------|
| S1   | 0.0331(3)       | 0.0502(3)       | 0.0290(3)       | 0.0013(3)       | 0.0015(2)       | -0.0137(2)      |
| S2   | 0.0266(2)       | 0.0316(2)       | 0.0355(3)       | 0.0061(2)       | 0.0002(2)       | -0.0019(2)      |
| O1   | 0.0499(10)      | 0.0462(9)       | 0.0194(7)       | 0.0066(8)       | -0.0103(7)      | -0.0087(6)      |
| O2   | 0.0254(7)       | 0.0223(6)       | 0.0176(6)       | -0.0003(6)      | -0.0039(5)      | 0.0001(5)       |
| O3   | 0.0113(6)       | 0.0662(10)      | 0.0313(8)       | -0.0009(7)      | -0.0021(6)      | -0.0057(7)      |
| O4   | 0.0528(9)       | 0.0235(7)       | 0.0335(8)       | -0.0100(7)      | -0.0081(7)      | 0.0068(5)       |
| O5   | 0.0225(7)       | 0.0441(8)       | 0.0326(7)       | 0.0027(7)       | -0.0057(6)      | 0.0197(6)       |
| O6   | 0.0255(7)       | 0.0238(6)       | 0.0274(7)       | -0.0042(6)      | 0.0061(6)       | 0.0002(5)       |
| O7   | 0.0371(8)       | 0.0268(7)       | 0.0256(7)       | -0.0127(6)      | 0.0068(6)       | -0.0015(5)      |
| O8   | 0.0427(9)       | 0.0326(7)       | 0.0199(6)       | -0.0140(7)      | 0.0032(6)       | -0.0021(5)      |
| N1   | 0.0122(7)       | 0.0232(7)       | 0.0187(7)       | -0.0024(6)      | -0.0020(6)      | 0.0038(6)       |
| N2   | 0.0198(7)       | 0.0219(7)       | 0.0225(7)       | -0.0041(7)      | 0.0035(6)       | -0.0016(6)      |
| C1   | 0.0264(9)       | 0.0288(9)       | 0.0186(8)       | -0.0040(8)      | -0.0010(8)      | -0.0006(7)      |
| C2   | 0.0207(9)       | 0.0221(8)       | 0.0198(8)       | -0.0034(7)      | 0.0022(7)       | -0.0003(7)      |
| C3   | 0.0343(11)      | 0.0288(10)      | 0.0197(9)       | -0.0035(9)      | 0.0056(8)       | -0.0057(7)      |
| C4   | 0.0333(11)      | 0.0239(9)       | 0.0323(10)      | 0.0041(9)       | 0.0083(9)       | -0.0047(7)      |
| C5   | 0.0226(10)      | 0.0242(9)       | 0.0301(10)      | 0.0037(7)       | 0.0029(8)       | 0.0034(7)       |
| C6   | 0.0134(8)       | 0.0216(8)       | 0.0233(9)       | -0.0019(7)      | 0.0028(6)       | 0.0015(7)       |
| C7   | 0.0144(8)       | 0.0213(8)       | 0.0172(8)       | -0.0027(7)      | 0.0016(7)       | 0.0010(6)       |
| C8   | 0.0156(8)       | 0.0196(8)       | 0.0153(7)       | -0.0020(7)      | -0.0006(6)      | 0.0025(6)       |
| C9   | 0.0149(8)       | 0.0204(8)       | 0.0168(8)       | -0.0016(7)      | 0.0012(6)       | 0.0043(6)       |
| C10  | 0.0170(8)       | 0.0225(8)       | 0.0194(8)       | -0.0020(7)      | 0.0036(7)       | 0.0049(7)       |
| C11  | 0.0187(9)       | 0.0255(9)       | 0.0266(9)       | 0.0021(8)       | 0.0038(7)       | 0.0078(7)       |
| C12  | 0.0195(9)       | 0.0313(10)      | 0.0295(10)      | -0.0024(8)      | -0.0032(8)      | 0.0129(8)       |
| C13  | 0.0231(9)       | 0.0307(9)       | 0.0207(8)       | -0.0057(8)      | -0.0055(8)      | 0.0052(7)       |
| C14  | 0.0200(9)       | 0.0246(9)       | 0.0179(8)       | -0.0052(7)      | -0.0013(7)      | 0.0030(7)       |
| C15  | 0.0144(8)       | 0.0209(8)       | 0.0244(9)       | 0.0006(7)       | -0.0020(7)      | 0.0028(6)       |
| C16  | 0.0154(8)       | 0.0200(8)       | 0.0208(8)       | -0.0004(7)      | -0.0017(7)      | 0.0024(6)       |
| C17  | 0.0193(9)       | 0.0289(9)       | 0.0248(9)       | 0.0024(8)       | -0.0017(8)      | -0.0021(7)      |
| C18  | 0.0240(9)       | 0.0265(9)       | 0.0179(8)       | 0.0039(8)       | 0.0008(7)       | 0.0013(7)       |
| C19  | 0.0372(12)      | 0.0612(15)      | 0.0399(12)      | 0.0121(12)      | -0.0009(11)     | 0.0319(11)      |
| C20  | 0.0196(8)       | 0.0188(8)       | 0.0219(9)       | 0.0035(7)       | 0.0029(7)       | 0.0036(7)       |
| C21  | 0.0210(9)       | 0.0220(8)       | 0.0215(8)       | -0.0021(7)      | 0.0037(7)       | -0.0001(7)      |
| C22  | 0.0234(9)       | 0.0205(9)       | 0.0278(9)       | -0.0019(7)      | 0.0033(8)       | -0.0001(7)      |
| C23  | 0.0251(10)      | 0.0192(8)       | 0.0219(9)       | -0.0015(7)      | 0.0031(7)       | 0.0003(7)       |
| C24  | 0.0578(14)      | 0.0354(11)      | 0.0206(9)       | -0.0092(11)     | 0.0083(10)      | -0.0014(8)      |

The general temperature factor expression:  $\exp(-2\pi^2(a^{*2}U_{11}h^2 + b^{*2}U_{22}k^2 + c^{*2}U_{33}l^2 + 2a^*b^*U_{12}hk + 2a^*c^*U_{13}hl + 2b^*c^*U_{23}kl))$ .

**Table 4.** Bond lengths (Å).

| Atom | Atom | Distance   | Atom | Atom | Distance |
|------|------|------------|------|------|----------|
| S1   | C17  | 1.8098(19) | S2   | C22  | 1.810(2) |
| O1   | C1   | 1.217(2)   | O2   | C8   | 1.221(2) |
| O3   | C15  | 1.229(2)   | O4   | C18  | 1.201(2) |
| O5   | C18  | 1.325(2)   | O5   | C19  | 1.446(3) |
| O6   | C20  | 1.228(2)   | O7   | C23  | 1.209(2) |
| O8   | C23  | 1.322(2)   | O8   | C24  | 1.450(3) |
| N1   | C15  | 1.339(2)   | N1   | C16  | 1.463(2) |
| N2   | C20  | 1.346(2)   | N2   | C21  | 1.453(2) |
| C1   | C2   | 1.494(3)   | C1   | C14  | 1.488(3) |
| C2   | C3   | 1.393(3)   | C2   | C7   | 1.401(3) |
| C3   | C4   | 1.386(3)   | C4   | C5   | 1.384(3) |
| C5   | C6   | 1.397(3)   | C6   | C7   | 1.404(2) |
| C6   | C15  | 1.504(3)   | C7   | C8   | 1.500(2) |
| C8   | C9   | 1.492(2)   | C9   | C10  | 1.401(2) |
| C9   | C14  | 1.403(2)   | C10  | C11  | 1.395(3) |
| C10  | C20  | 1.511(2)   | C11  | C12  | 1.390(3) |
| C12  | C13  | 1.380(3)   | C13  | C14  | 1.396(3) |
| C16  | C17  | 1.524(3)   | C16  | C18  | 1.526(3) |
| C21  | C22  | 1.527(2)   | C21  | C23  | 1.514(3) |

**Table 5.** Bond lengths involving hydrogens (Å).

| Atom | Atom | Distance | Atom | Atom | Distance |
|------|------|----------|------|------|----------|
| S1   | H1   | 1.038    | S2   | H2   | 1.087    |
| N1   | H3   | 0.880    | N2   | H4   | 0.880    |
| C3   | H5   | 0.950    | C4   | H6   | 0.950    |
| C5   | H7   | 0.950    | C11  | H8   | 0.950    |
| C12  | H9   | 0.950    | C13  | H10  | 0.950    |
| C16  | H11  | 1.000    | C17  | H12  | 0.990    |
| C17  | H13  | 0.990    | C19  | H14  | 0.980    |
| C19  | H15  | 0.980    | C19  | H16  | 0.980    |
| C21  | H17  | 1.000    | C22  | H18  | 0.990    |
| C22  | H19  | 0.990    | C24  | H20  | 0.980    |
| C24  | H21  | 0.980    | C24  | H22  | 0.980    |

**Table 6.** Bond angles (°).

| Atom | Atom | Atom | Angle      | Atom | Atom | Atom | Angle      |
|------|------|------|------------|------|------|------|------------|
| C18  | O5   | C19  | 115.68(17) | C23  | O8   | C24  | 115.66(16) |
| C15  | N1   | C16  | 121.67(15) | C20  | N2   | C21  | 120.32(15) |
| O1   | C1   | C2   | 120.50(18) | O1   | C1   | C14  | 121.42(18) |
| C2   | C1   | C14  | 118.07(15) | C1   | C2   | C3   | 118.43(16) |
| C1   | C2   | C7   | 120.84(16) | C3   | C2   | C7   | 120.73(17) |
| C2   | C3   | C4   | 120.04(18) | C3   | C4   | C5   | 119.45(18) |
| C4   | C5   | C6   | 121.51(18) | C5   | C6   | C7   | 119.08(17) |
| C5   | C6   | C15  | 115.24(16) | C7   | C6   | C15  | 125.68(15) |
| C2   | C7   | C6   | 119.07(16) | C2   | C7   | C8   | 120.04(15) |
| C6   | C7   | C8   | 120.58(15) | O2   | C8   | C7   | 120.44(16) |
| O2   | C8   | C9   | 121.65(15) | C7   | C8   | C9   | 117.88(14) |
| C8   | C9   | C10  | 120.07(14) | C8   | C9   | C14  | 120.62(15) |
| C10  | C9   | C14  | 119.30(16) | C9   | C10  | C11  | 119.42(16) |
| C9   | C10  | C20  | 122.98(16) | C11  | C10  | C20  | 117.43(15) |
| C10  | C11  | C12  | 120.58(17) | C11  | C12  | C13  | 120.22(18) |
| C12  | C13  | C14  | 119.84(17) | C1   | C14  | C9   | 120.71(16) |
| C1   | C14  | C13  | 118.84(16) | C9   | C14  | C13  | 120.39(17) |
| O3   | C15  | N1   | 123.37(17) | O3   | C15  | C6   | 119.81(16) |
| N1   | C15  | C6   | 116.48(15) | N1   | C16  | C17  | 108.90(14) |
| N1   | C16  | C18  | 109.65(14) | C17  | C16  | C18  | 109.82(15) |
| S1   | C17  | C16  | 114.01(13) | O4   | C18  | O5   | 124.98(18) |
| O4   | C18  | C16  | 124.08(17) | O5   | C18  | C16  | 110.93(16) |
| O6   | C20  | N2   | 123.62(16) | O6   | C20  | C10  | 120.28(16) |
| N2   | C20  | C10  | 116.00(15) | N2   | C21  | C22  | 113.14(15) |
| N2   | C21  | C23  | 108.66(14) | C22  | C21  | C23  | 111.02(15) |
| S2   | C22  | C21  | 114.27(13) | O7   | C23  | O8   | 125.02(17) |
| O7   | C23  | C21  | 124.31(16) | O8   | C23  | C21  | 110.65(15) |

**Table 7.** Bond angles involving hydrogens (°).

| Atom | Atom | Atom | Angle | Atom | Atom | Atom | Angle |
|------|------|------|-------|------|------|------|-------|
| C17  | S1   | H1   | 101.1 | C22  | S2   | H2   | 101.0 |
| C15  | N1   | H3   | 119.2 | C16  | N1   | H3   | 119.2 |
| C20  | N2   | H4   | 119.8 | C21  | N2   | H4   | 119.8 |
| C2   | C3   | H5   | 120.0 | C4   | C3   | H5   | 120.0 |
| C3   | C4   | H6   | 120.3 | C5   | C4   | H6   | 120.3 |
| C4   | C5   | H7   | 119.2 | C6   | C5   | H7   | 119.3 |
| C10  | C11  | H8   | 119.7 | C12  | C11  | H8   | 119.7 |
| C11  | C12  | H9   | 119.9 | C13  | C12  | H9   | 119.9 |
| C12  | C13  | H10  | 120.1 | C14  | C13  | H10  | 120.1 |
| N1   | C16  | H11  | 109.5 | C17  | C16  | H11  | 109.5 |
| C18  | C16  | H11  | 109.5 | S1   | C17  | H12  | 108.8 |
| S1   | C17  | H13  | 108.7 | C16  | C17  | H12  | 108.8 |
| C16  | C17  | H13  | 108.7 | H12  | C17  | H13  | 107.6 |
| O5   | C19  | H14  | 109.5 | O5   | C19  | H15  | 109.5 |
| O5   | C19  | H16  | 109.5 | H14  | C19  | H15  | 109.5 |
| H14  | C19  | H16  | 109.5 | H15  | C19  | H16  | 109.5 |
| N2   | C21  | H17  | 107.9 | C22  | C21  | H17  | 108.0 |
| C23  | C21  | H17  | 108.0 | S2   | C22  | H18  | 108.7 |
| S2   | C22  | H19  | 108.7 | C21  | C22  | H18  | 108.7 |
| C21  | C22  | H19  | 108.7 | H18  | C22  | H19  | 107.6 |
| O8   | C24  | H20  | 109.5 | O8   | C24  | H21  | 109.5 |
| O8   | C24  | H22  | 109.5 | H20  | C24  | H21  | 109.5 |
| H20  | C24  | H22  | 109.4 | H21  | C24  | H22  | 109.5 |

**Table 8.** Torsion Angles (°). (Those having bond angles >160 or <20 degrees are excluded.)

| Atom1 | Atom2 | Atom3 | Atom4 | Angle       | Atom1 | Atom2 | Atom3 | Atom4 | Angle       |
|-------|-------|-------|-------|-------------|-------|-------|-------|-------|-------------|
| C19   | O5    | C18   | O4    | -2.8(3)     | C19   | O5    | C18   | C16   | 176.24(15)  |
| C24   | O8    | C23   | O7    | -2.8(3)     | C24   | O8    | C23   | C21   | 176.01(14)  |
| C15   | N1    | C16   | C17   | 144.75(14)  | C15   | N1    | C16   | C18   | -95.06(17)  |
| C16   | N1    | C15   | O3    | 6.6(3)      | C16   | N1    | C15   | C6    | 179.87(13)  |
| C20   | N2    | C21   | C22   | 67.0(2)     | C20   | N2    | C21   | C23   | -169.24(14) |
| C21   | N2    | C20   | O6    | -7.6(3)     | C21   | N2    | C20   | C10   | 175.97(13)  |
| O1    | C1    | C2    | C3    | -4.6(3)     | O1    | C1    | C2    | C7    | 175.53(16)  |
| O1    | C1    | C14   | C9    | -168.64(17) | O1    | C1    | C14   | C13   | 8.6(3)      |
| C2    | C1    | C14   | C9    | 10.4(2)     | C2    | C1    | C14   | C13   | -172.31(14) |
| C14   | C1    | C2    | C3    | 176.32(14)  | C14   | C1    | C2    | C7    | -3.6(2)     |
| C1    | C2    | C3    | C4    | 179.30(15)  | C1    | C2    | C7    | C6    | 177.62(14)  |
| C1    | C2    | C7    | C8    | -8.8(2)     | C3    | C2    | C7    | C6    | -2.3(3)     |
| C3    | C2    | C7    | C8    | 171.35(15)  | C7    | C2    | C3    | C4    | -0.8(3)     |
| C2    | C3    | C4    | C5    | 2.2(3)      | C3    | C4    | C5    | C6    | -0.4(3)     |
| C4    | C5    | C6    | C7    | -2.6(3)     | C4    | C5    | C6    | C15   | 177.54(16)  |
| C5    | C6    | C7    | C2    | 3.9(2)      | C5    | C6    | C7    | C8    | -169.65(15) |
| C5    | C6    | C15   | O3    | 54.5(2)     | C5    | C6    | C15   | N1    | -118.96(17) |
| C7    | C6    | C15   | O3    | -125.29(18) | C7    | C6    | C15   | N1    | 61.2(2)     |
| C15   | C6    | C7    | C2    | -176.26(14) | C15   | C6    | C7    | C8    | 10.2(3)     |
| C2    | C7    | C8    | O2    | -163.78(15) | C2    | C7    | C8    | C9    | 14.4(2)     |
| C6    | C7    | C8    | O2    | 9.7(2)      | C6    | C7    | C8    | C9    | -172.05(14) |
| O2    | C8    | C9    | C10   | -8.6(2)     | O2    | C8    | C9    | C14   | 170.54(14)  |
| C7    | C8    | C9    | C10   | 173.18(13)  | C7    | C8    | C9    | C14   | -7.6(2)     |
| C8    | C9    | C10   | C11   | -175.19(14) | C8    | C9    | C10   | C20   | 9.7(2)      |
| C8    | C9    | C14   | C1    | -4.6(2)     | C8    | C9    | C14   | C13   | 178.15(14)  |
| C10   | C9    | C14   | C1    | 174.54(14)  | C10   | C9    | C14   | C13   | -2.7(2)     |
| C14   | C9    | C10   | C11   | 5.6(2)      | C14   | C9    | C10   | C20   | -169.47(14) |
| C9    | C10   | C11   | C12   | -4.4(3)     | C9    | C10   | C20   | O6    | 81.7(2)     |
| C9    | C10   | C20   | N2    | -101.77(19) | C11   | C10   | C20   | O6    | -93.5(2)    |
| C11   | C10   | C20   | N2    | 83.04(19)   | C20   | C10   | C11   | C12   | 171.02(14)  |
| C10   | C11   | C12   | C13   | -0.0(3)     | C11   | C12   | C13   | C14   | 3.0(3)      |
| C12   | C13   | C14   | C1    | -178.94(15) | C12   | C13   | C14   | C9    | -1.7(3)     |
| N1    | C16   | C17   | S1    | 172.77(11)  | N1    | C16   | C18   | O4    | -51.3(2)    |
| N1    | C16   | C18   | O5    | 129.66(14)  | C17   | C16   | C18   | O4    | 68.3(2)     |
| C17   | C16   | C18   | O5    | -110.71(16) | C18   | C16   | C17   | S1    | 52.68(18)   |
| N2    | C21   | C22   | S2    | 69.97(18)   | N2    | C21   | C23   | O7    | 0.3(2)      |
| N2    | C21   | C23   | O8    | -178.51(13) | C22   | C21   | C23   | O7    | 125.36(17)  |
| C22   | C21   | C23   | O8    | -53.47(19)  | C23   | C21   | C22   | S2    | -52.51(19)  |

**Table 9.** Possible hydrogen bonds.

| Donor | H  | Acceptor        | D...A    | D-H  | H...A | D-H...A |
|-------|----|-----------------|----------|------|-------|---------|
| N1    | H3 | O3 <sup>1</sup> | 2.890(2) | 0.88 | 2.08  | 152.94  |
| N2    | H4 | O7              | 2.687(2) | 0.88 | 2.34  | 103.93  |

Symmetry Operators: (1) X-1,Y,Z.

**Table 10.** Intramolecular contacts less than 3.60 Å.

| Atom | Atom | Distance   | Atom | Atom | Distance   |
|------|------|------------|------|------|------------|
| S1   | O5   | 3.4320(16) | S1   | C18  | 3.1035(19) |
| S2   | O8   | 3.4342(15) | S2   | N2   | 3.3273(16) |
| S2   | C23  | 3.1301(18) | O1   | C3   | 2.782(3)   |
| O1   | C13  | 2.807(2)   | O2   | O3   | 3.460(2)   |
| O2   | O6   | 2.9540(17) | O2   | N1   | 2.8718(19) |
| O2   | N2   | 3.162(2)   | O2   | C6   | 2.843(2)   |
| O2   | C10  | 2.845(2)   | O2   | C15  | 2.748(2)   |
| O2   | C20  | 2.648(2)   | O3   | C5   | 2.918(3)   |
| O3   | C7   | 3.528(2)   | O3   | C16  | 2.795(2)   |
| O3   | C18  | 3.474(2)   | O4   | N1   | 2.901(2)   |
| O4   | C17  | 3.060(2)   | O4   | C19  | 2.659(3)   |
| O5   | N1   | 3.436(2)   | O5   | C17  | 3.342(2)   |
| O6   | C8   | 3.474(2)   | O6   | C9   | 3.242(2)   |
| O6   | C11  | 3.242(2)   | O6   | C21  | 2.773(2)   |
| O6   | C22  | 3.018(2)   | O7   | N2   | 2.687(2)   |
| O7   | C22  | 3.493(2)   | O7   | C24  | 2.664(2)   |
| O8   | N2   | 3.579(2)   | O8   | C22  | 2.802(2)   |
| N1   | C5   | 3.431(3)   | N1   | C7   | 3.154(2)   |
| N1   | C8   | 3.283(2)   | N2   | C9   | 3.409(2)   |
| N2   | C11  | 3.188(2)   | C1   | C8   | 2.925(2)   |
| C2   | C5   | 2.765(3)   | C2   | C9   | 2.919(2)   |
| C3   | C6   | 2.796(3)   | C4   | C7   | 2.803(3)   |
| C7   | C14  | 2.916(3)   | C8   | C15  | 3.053(2)   |
| C8   | C20  | 2.979(2)   | C9   | C12  | 2.792(3)   |
| C10  | C13  | 2.795(3)   | C11  | C14  | 2.775(3)   |
| C15  | C18  | 3.291(3)   | C20  | C22  | 3.084(3)   |

**Table 11.** Intramolecular contacts less than 3.60 Å involving hydrogens.

| Atom | Atom | Distance | Atom | Atom | Distance |
|------|------|----------|------|------|----------|
| S1   | H11  | 3.027    | S1   | H20  | 3.109    |
| S2   | H4   | 3.556    | O1   | H5   | 2.485    |
| O1   | H10  | 2.523    | O2   | H3   | 2.917    |
| O2   | H4   | 3.502    | O2   | H13  | 3.316    |
| O2   | H17  | 3.408    | O3   | H3   | 3.030    |
| O3   | H7   | 2.714    | O3   | H11  | 2.483    |
| O4   | H3   | 3.013    | O4   | H11  | 3.185    |
| O4   | H12  | 2.910    | O4   | H14  | 2.787    |
| O4   | H16  | 2.477    | O5   | H1   | 3.475    |
| O5   | H11  | 2.358    | O6   | H4   | 3.041    |
| O6   | H8   | 3.308    | O6   | H17  | 2.694    |
| O6   | H18  | 2.390    | O7   | H4   | 2.335    |
| O7   | H12  | 3.495    | O7   | H13  | 3.109    |
| O7   | H17  | 3.003    | O7   | H20  | 2.811    |
| O7   | H21  | 2.463    | O8   | H13  | 3.557    |
| O8   | H17  | 2.582    | O8   | H19  | 2.580    |
| N1   | H7   | 3.553    | N1   | H12  | 2.556    |
| N1   | H13  | 2.663    | N2   | H2   | 2.976    |
| N2   | H8   | 3.116    | N2   | H13  | 3.534    |
| N2   | H18  | 2.634    | N2   | H19  | 3.309    |
| C1   | H5   | 2.626    | C1   | H10  | 2.634    |
| C2   | H6   | 3.267    | C3   | H7   | 3.248    |
| C5   | H3   | 3.535    | C5   | H5   | 3.252    |
| C6   | H3   | 2.506    | C6   | H6   | 3.282    |
| C7   | H3   | 2.960    | C7   | H5   | 3.285    |
| C7   | H7   | 3.270    | C8   | H3   | 3.084    |
| C9   | H4   | 3.436    | C9   | H8   | 3.271    |
| C9   | H10  | 3.285    | C10  | H4   | 2.518    |
| C10  | H9   | 3.275    | C11  | H4   | 3.106    |
| C11  | H10  | 3.259    | C13  | H8   | 3.256    |
| C14  | H9   | 3.260    | C15  | H7   | 2.558    |
| C15  | H11  | 2.547    | C16  | H1   | 2.967    |
| C17  | H3   | 2.559    | C18  | H1   | 3.445    |
| C18  | H3   | 2.871    | C18  | H12  | 2.745    |
| C18  | H13  | 3.344    | C18  | H14  | 2.665    |
| C18  | H15  | 3.153    | C18  | H16  | 2.512    |
| C20  | H2   | 3.585    | C20  | H8   | 2.619    |
| C20  | H17  | 2.619    | C20  | H18  | 2.768    |
| C21  | H2   | 2.968    | C21  | H13  | 3.279    |
| C22  | H4   | 3.098    | C23  | H2   | 3.447    |
| C23  | H4   | 2.476    | C23  | H13  | 3.016    |
| C23  | H18  | 3.348    | C23  | H19  | 2.762    |
| C23  | H20  | 2.695    | C23  | H21  | 2.492    |
| C23  | H22  | 3.148    | H1   | H11  | 2.838    |

Table 11. *Cont.*

| Atom | Atom | Distance | Atom | Atom | Distance |
|------|------|----------|------|------|----------|
| H1   | H12  | 3.036    | H1   | H13  | 2.492    |
| H1   | H20  | 3.288    | H2   | H4   | 3.085    |
| H2   | H8   | 3.476    | H2   | H18  | 2.525    |
| H2   | H19  | 3.075    | H3   | H11  | 2.782    |
| H3   | H12  | 2.350    | H3   | H13  | 2.781    |
| H4   | H8   | 3.046    | H4   | H17  | 2.685    |
| H4   | H18  | 3.367    | H5   | H6   | 2.340    |
| H6   | H7   | 2.328    | H8   | H9   | 2.335    |
| H9   | H10  | 2.330    | H11  | H12  | 2.872    |
| H11  | H13  | 2.337    | H13  | H17  | 2.834    |
| H17  | H18  | 2.396    | H17  | H19  | 2.291    |

Table 12. Intermolecular contacts less than 3.60 Å.

| Atom | aTom             | Distance   | Atom | Atom             | Distance   |
|------|------------------|------------|------|------------------|------------|
| S1   | O5 <sup>1</sup>  | 3.4332(16) | S2   | C11 <sup>2</sup> | 3.5555(19) |
| S2   | C22 <sup>1</sup> | 3.354(2)   | O1   | C24 <sup>3</sup> | 2.889(3)   |
| O2   | O3 <sup>1</sup>  | 3.478(2)   | O2   | N2 <sup>4</sup>  | 3.373(2)   |
| O2   | C10 <sup>4</sup> | 3.372(2)   | O2   | C11 <sup>4</sup> | 3.230(2)   |
| O3   | O2 <sup>4</sup>  | 3.478(2)   | O3   | N1 <sup>4</sup>  | 2.890(2)   |
| O3   | C8 <sup>4</sup>  | 3.339(2)   | O3   | C17 <sup>4</sup> | 3.198(2)   |
| O4   | O5 <sup>1</sup>  | 3.457(2)   | O4   | C3 <sup>5</sup>  | 3.593(3)   |
| O4   | C4 <sup>5</sup>  | 3.305(3)   | O4   | C19 <sup>1</sup> | 3.389(3)   |
| O4   | C24 <sup>6</sup> | 3.551(2)   | O5   | S1 <sup>4</sup>  | 3.4332(16) |
| O5   | O4 <sup>4</sup>  | 3.457(2)   | O5   | C17 <sup>4</sup> | 3.319(2)   |
| O6   | C11 <sup>4</sup> | 3.284(2)   | O7   | C16 <sup>1</sup> | 3.214(2)   |
| O7   | C17 <sup>1</sup> | 3.229(2)   | O8   | C19 <sup>7</sup> | 3.187(3)   |
| N1   | O3 <sup>1</sup>  | 2.890(2)   | N2   | O2 <sup>1</sup>  | 3.373(2)   |
| C2   | C13 <sup>4</sup> | 3.474(3)   | C3   | O4 <sup>8</sup>  | 3.593(3)   |
| C4   | O4 <sup>8</sup>  | 3.305(3)   | C8   | O3 <sup>1</sup>  | 3.339(2)   |
| C8   | C11 <sup>4</sup> | 3.375(3)   | C8   | C12 <sup>4</sup> | 3.406(3)   |
| C9   | C12 <sup>4</sup> | 3.450(3)   | C10  | O2 <sup>1</sup>  | 3.372(2)   |
| C11  | S2 <sup>9</sup>  | 3.5555(19) | C11  | O2 <sup>1</sup>  | 3.230(2)   |
| C11  | O6 <sup>1</sup>  | 3.284(2)   | C11  | C8 <sup>1</sup>  | 3.375(3)   |
| C12  | C8 <sup>1</sup>  | 3.406(3)   | C12  | C9 <sup>1</sup>  | 3.450(3)   |
| C13  | C2 <sup>1</sup>  | 3.474(3)   | C16  | O7 <sup>4</sup>  | 3.214(2)   |
| C17  | O3 <sup>1</sup>  | 3.198(2)   | C17  | O5 <sup>1</sup>  | 3.319(2)   |
| C17  | O7 <sup>4</sup>  | 3.229(2)   | C19  | O4 <sup>4</sup>  | 3.389(3)   |
| C19  | O8 <sup>10</sup> | 3.187(3)   | C22  | S2 <sup>4</sup>  | 3.354(2)   |
| C24  | O1 <sup>11</sup> | 2.889(3)   | C24  | O4 <sup>12</sup> | 3.551(2)   |

Symmetry Operators:

- |                         |                            |
|-------------------------|----------------------------|
| (1) X-1,Y,Z             | (2) X+1/2-1,-Y+1/2+1,-Z+1  |
| (3) -X+1/2,-Y+1,Z+1/2-1 | (4) X+1,Y,Z                |
| (5) X+1/2-1,-Y+1/2,-Z+1 | (6) -X+1,Y+1/2-1,-Z+1/2+1  |
| (7) -X+2,Y+1/2,-Z+1/2+1 | (8) X+1/2,-Y+1/2,-Z+1      |
| (9) X+1/2,-Y+1/2+1,-Z+1 | (10) -X+2,Y+1/2-1,-Z+1/2+1 |
| (11) -X+1/2,-Y+1,Z+1/2  | (12) -X+1,Y+1/2,-Z+1/2+1   |



**Table 13.** Intermolecular contacts less than 3.60 Å involving hydrogens.

| Atom | Atom              | Distance | Atom | Atom              | Distance |
|------|-------------------|----------|------|-------------------|----------|
| S1   | H10 <sup>1</sup>  | 3.594    | S1   | H15 <sup>2</sup>  | 3.585    |
| S1   | H21 <sup>3</sup>  | 3.508    | S2   | H9 <sup>4</sup>   | 3.189    |
| S2   | H14 <sup>5</sup>  | 3.092    | S2   | H17 <sup>2</sup>  | 3.190    |
| S2   | H18 <sup>2</sup>  | 3.006    | S2   | H19 <sup>2</sup>  | 2.920    |
| O1   | H1 <sup>6</sup>   | 2.984    | O1   | H16 <sup>7</sup>  | 3.265    |
| O1   | H20 <sup>8</sup>  | 2.823    | O1   | H20 <sup>6</sup>  | 3.544    |
| O1   | H21 <sup>8</sup>  | 2.623    | O1   | H22 <sup>8</sup>  | 2.728    |
| O2   | H4 <sup>3</sup>   | 2.549    | O2   | H8 <sup>3</sup>   | 3.301    |
| O3   | H3 <sup>3</sup>   | 2.078    | O3   | H4 <sup>3</sup>   | 3.492    |
| O3   | H6 <sup>9</sup>   | 3.530    | O3   | H12 <sup>3</sup>  | 2.494    |
| O3   | H13 <sup>3</sup>  | 3.193    | O4   | H5 <sup>7</sup>   | 3.150    |
| O4   | H5 <sup>9</sup>   | 3.524    | O4   | H6 <sup>7</sup>   | 2.557    |
| O4   | H15 <sup>2</sup>  | 2.888    | O4   | H16 <sup>2</sup>  | 3.370    |
| O4   | H22 <sup>10</sup> | 2.699    | O5   | H12 <sup>3</sup>  | 2.534    |
| O6   | H2 <sup>3</sup>   | 2.635    | O6   | H2 <sup>4</sup>   | 3.244    |
| O6   | H4 <sup>3</sup>   | 3.358    | O6   | H8 <sup>3</sup>   | 2.539    |
| O6   | H8 <sup>4</sup>   | 3.388    | O6   | H18 <sup>4</sup>  | 3.526    |
| O7   | H1 <sup>2</sup>   | 3.012    | O7   | H11 <sup>2</sup>  | 2.481    |
| O7   | H13 <sup>2</sup>  | 2.694    | O7   | H17 <sup>2</sup>  | 2.898    |
| O8   | H14 <sup>11</sup> | 3.352    | O8   | H15 <sup>11</sup> | 2.729    |
| O8   | H16 <sup>11</sup> | 2.980    | O8   | H21 <sup>3</sup>  | 3.492    |
| N1   | H6 <sup>7</sup>   | 2.969    | C1   | H10 <sup>3</sup>  | 3.451    |
| C2   | H10 <sup>3</sup>  | 3.451    | C3   | H7 <sup>7</sup>   | 3.521    |
| C3   | H16 <sup>7</sup>  | 3.437    | C3   | H22 <sup>6</sup>  | 3.265    |
| C4   | H3 <sup>9</sup>   | 3.417    | C4   | H7 <sup>7</sup>   | 2.918    |
| C5   | H7 <sup>7</sup>   | 2.872    | C6   | H7 <sup>7</sup>   | 3.464    |
| C8   | H8 <sup>3</sup>   | 3.593    | C9   | H9 <sup>3</sup>   | 3.277    |
| C11  | H2 <sup>4</sup>   | 3.279    | C11  | H18 <sup>12</sup> | 2.889    |
| C12  | H18 <sup>12</sup> | 3.200    | C12  | H19 <sup>12</sup> | 3.411    |
| C13  | H20 <sup>8</sup>  | 3.525    | C14  | H9 <sup>3</sup>   | 3.337    |
| C15  | H3 <sup>3</sup>   | 3.260    | C15  | H6 <sup>7</sup>   | 3.524    |
| C15  | H12 <sup>3</sup>  | 3.414    | C16  | H12 <sup>3</sup>  | 3.000    |
| C17  | H11 <sup>2</sup>  | 3.015    | C18  | H6 <sup>7</sup>   | 3.296    |
| C18  | H12 <sup>3</sup>  | 3.186    | C18  | H15 <sup>2</sup>  | 3.556    |
| C19  | H5 <sup>9</sup>   | 3.312    | C19  | H19 <sup>13</sup> | 2.976    |
| C19  | H21 <sup>10</sup> | 3.375    | C19  | H22 <sup>13</sup> | 3.217    |
| C20  | H8 <sup>3</sup>   | 3.400    | C21  | H2 <sup>3</sup>   | 3.401    |
| C22  | H2 <sup>3</sup>   | 3.071    | C22  | H8 <sup>4</sup>   | 3.144    |
| C22  | H9 <sup>4</sup>   | 3.135    | C22  | H14 <sup>11</sup> | 3.589    |
| C22  | H15 <sup>11</sup> | 3.364    | C23  | H11 <sup>2</sup>  | 3.495    |
| C23  | H17 <sup>2</sup>  | 3.458    | C24  | H1 <sup>2</sup>   | 3.080    |
| C24  | H5 <sup>14</sup>  | 3.470    | C24  | H10 <sup>1</sup>  | 3.386    |
| C24  | H14 <sup>5</sup>  | 3.509    | C24  | H15 <sup>11</sup> | 3.273    |
| C24  | H16 <sup>5</sup>  | 3.345    | C24  | H16 <sup>11</sup> | 3.268    |

Table 13. *Cont.*

| Atom | Atom              | Distance | Atom | Atom              | Distance |
|------|-------------------|----------|------|-------------------|----------|
| H1   | O1 <sup>14</sup>  | 2.984    | H1   | O7 <sup>3</sup>   | 3.012    |
| H1   | C24 <sup>3</sup>  | 3.080    | H1   | H10 <sup>14</sup> | 3.226    |
| H1   | H20 <sup>3</sup>  | 2.717    | H1   | H21 <sup>3</sup>  | 2.568    |
| H2   | O6 <sup>2</sup>   | 2.635    | H2   | O6 <sup>12</sup>  | 3.244    |
| H2   | C11 <sup>12</sup> | 3.279    | H2   | C21 <sup>2</sup>  | 3.401    |
| H2   | C22 <sup>2</sup>  | 3.071    | H2   | H8 <sup>12</sup>  | 3.112    |
| H2   | H17 <sup>2</sup>  | 2.856    | H2   | H18 <sup>2</sup>  | 2.501    |
| H2   | H19 <sup>2</sup>  | 2.971    | H3   | O3 <sup>2</sup>   | 2.078    |
| H3   | C4 <sup>7</sup>   | 3.417    | H3   | C15 <sup>2</sup>  | 3.260    |
| H3   | H6 <sup>7</sup>   | 2.597    | H3   | H7 <sup>2</sup>   | 3.451    |
| H4   | O2 <sup>2</sup>   | 2.549    | H4   | O3 <sup>2</sup>   | 3.492    |
| H4   | O6 <sup>2</sup>   | 3.358    | H4   | H11 <sup>2</sup>  | 3.588    |
| H4   | H17 <sup>2</sup>  | 3.329    | H5   | O4 <sup>7</sup>   | 3.524    |
| H5   | O4 <sup>9</sup>   | 3.150    | H5   | C19 <sup>7</sup>  | 3.312    |
| H5   | C24 <sup>6</sup>  | 3.470    | H5   | H15 <sup>7</sup>  | 3.592    |
| H5   | H16 <sup>7</sup>  | 2.492    | H5   | H20 <sup>6</sup>  | 3.512    |
| H5   | H22 <sup>6</sup>  | 2.644    | H6   | O3 <sup>7</sup>   | 3.530    |
| H6   | O4 <sup>9</sup>   | 2.557    | H6   | N1 <sup>9</sup>   | 2.969    |
| H6   | C15 <sup>9</sup>  | 3.524    | H6   | C18 <sup>9</sup>  | 3.296    |
| H6   | H3 <sup>9</sup>   | 2.597    | H6   | H7 <sup>7</sup>   | 3.094    |
| H7   | C3 <sup>9</sup>   | 3.521    | H7   | C4 <sup>9</sup>   | 2.918    |
| H7   | C5 <sup>9</sup>   | 2.872    | H7   | C6 <sup>9</sup>   | 3.464    |
| H7   | H3 <sup>3</sup>   | 3.451    | H7   | H6 <sup>9</sup>   | 3.094    |
| H7   | H7 <sup>7</sup>   | 3.010    | H7   | H7 <sup>9</sup>   | 3.010    |
| H8   | O2 <sup>2</sup>   | 3.301    | H8   | O6 <sup>2</sup>   | 2.539    |
| H8   | O6 <sup>12</sup>  | 3.388    | H8   | C8 <sup>2</sup>   | 3.593    |
| H8   | C20 <sup>2</sup>  | 3.400    | H8   | C22 <sup>12</sup> | 3.144    |
| H8   | H2 <sup>4</sup>   | 3.112    | H8   | H18 <sup>12</sup> | 2.276    |
| H8   | H19 <sup>12</sup> | 3.413    | H9   | S2 <sup>12</sup>  | 3.189    |
| H9   | C9 <sup>2</sup>   | 3.277    | H9   | C14 <sup>2</sup>  | 3.337    |
| H9   | C22 <sup>12</sup> | 3.135    | H9   | H18 <sup>12</sup> | 2.893    |
| H9   | H19 <sup>12</sup> | 2.887    | H10  | S1 <sup>8</sup>   | 3.594    |
| H10  | C1 <sup>2</sup>   | 3.451    | H10  | C2 <sup>2</sup>   | 3.451    |
| H10  | C24 <sup>8</sup>  | 3.386    | H10  | H1 <sup>6</sup>   | 3.226    |
| H10  | H20 <sup>8</sup>  | 2.604    | H10  | H22 <sup>8</sup>  | 3.466    |
| H11  | O7 <sup>3</sup>   | 2.481    | H11  | C17 <sup>3</sup>  | 3.015    |
| H11  | C23 <sup>3</sup>  | 3.495    | H11  | H4 <sup>3</sup>   | 3.588    |
| H11  | H12 <sup>3</sup>  | 2.216    | H11  | H13 <sup>3</sup>  | 3.087    |
| H12  | O3 <sup>2</sup>   | 2.494    | H12  | O5 <sup>2</sup>   | 2.534    |
| H12  | C15 <sup>2</sup>  | 3.414    | H12  | C16 <sup>2</sup>  | 3.000    |
| H12  | C18 <sup>2</sup>  | 3.186    | H12  | H11 <sup>2</sup>  | 2.216    |
| H12  | H15 <sup>2</sup>  | 3.556    | H13  | O3 <sup>2</sup>   | 3.193    |
| H13  | O7 <sup>3</sup>   | 2.694    | H13  | H11 <sup>2</sup>  | 3.087    |

Table 13. *Cont.*

| Atom | Atom              | Distance | Atom | Atom              | Distance |
|------|-------------------|----------|------|-------------------|----------|
| H14  | S2 <sup>10</sup>  | 3.092    | H14  | O8 <sup>13</sup>  | 3.352    |
| H14  | C22 <sup>13</sup> | 3.589    | H14  | C24 <sup>10</sup> | 3.509    |
| H14  | H15 <sup>2</sup>  | 3.476    | H14  | H19 <sup>13</sup> | 2.617    |
| H14  | H21 <sup>10</sup> | 3.080    | H14  | H22 <sup>10</sup> | 3.338    |
| H15  | S1 <sup>3</sup>   | 3.585    | H15  | O4 <sup>3</sup>   | 2.888    |
| H15  | O8 <sup>13</sup>  | 2.729    | H15  | C18 <sup>3</sup>  | 3.556    |
| H15  | C22 <sup>13</sup> | 3.364    | H15  | C24 <sup>13</sup> | 3.273    |
| H15  | H5 <sup>9</sup>   | 3.592    | H15  | H12 <sup>3</sup>  | 3.556    |
| H15  | H14 <sup>3</sup>  | 3.476    | H15  | H19 <sup>13</sup> | 2.485    |
| H15  | H22 <sup>13</sup> | 2.822    | H16  | O1 <sup>9</sup>   | 3.265    |
| H16  | O4 <sup>3</sup>   | 3.370    | H16  | O8 <sup>13</sup>  | 2.980    |
| H16  | C3 <sup>9</sup>   | 3.437    | H16  | C24 <sup>10</sup> | 3.345    |
| H16  | C24 <sup>13</sup> | 3.268    | H16  | H5 <sup>9</sup>   | 2.492    |
| H16  | H19 <sup>13</sup> | 3.502    | H16  | H21 <sup>10</sup> | 2.782    |
| H16  | H22 <sup>10</sup> | 3.047    | H16  | H22 <sup>13</sup> | 2.718    |
| H17  | S2 <sup>3</sup>   | 3.190    | H17  | O7 <sup>3</sup>   | 2.898    |
| H17  | C23 <sup>3</sup>  | 3.458    | H17  | H2 <sup>3</sup>   | 2.856    |
| H17  | H4 <sup>3</sup>   | 3.329    | H18  | S2 <sup>3</sup>   | 3.006    |
| H18  | O6 <sup>12</sup>  | 3.526    | H18  | C11 <sup>4</sup>  | 2.889    |
| H18  | C12 <sup>4</sup>  | 3.200    | H18  | H2 <sup>3</sup>   | 2.501    |
| H18  | H8 <sup>4</sup>   | 2.276    | H18  | H9 <sup>4</sup>   | 2.893    |
| H19  | S2 <sup>3</sup>   | 2.920    | H19  | C12 <sup>4</sup>  | 3.411    |
| H19  | C19 <sup>11</sup> | 2.976    | H19  | H2 <sup>3</sup>   | 2.971    |
| H19  | H8 <sup>4</sup>   | 3.413    | H19  | H9 <sup>4</sup>   | 2.887    |
| H19  | H14 <sup>11</sup> | 2.617    | H19  | H15 <sup>11</sup> | 2.485    |
| H19  | H16 <sup>11</sup> | 3.502    | H20  | O1 <sup>1</sup>   | 2.823    |
| H20  | O1 <sup>14</sup>  | 3.544    | H20  | C13 <sup>1</sup>  | 3.525    |
| H20  | H1 <sup>2</sup>   | 2.717    | H20  | H5 <sup>14</sup>  | 3.512    |
| H20  | H10 <sup>1</sup>  | 2.604    | H21  | S1 <sup>2</sup>   | 3.508    |
| H21  | O1 <sup>1</sup>   | 2.623    | H21  | O8 <sup>2</sup>   | 3.492    |
| H21  | C19 <sup>5</sup>  | 3.375    | H21  | H1 <sup>2</sup>   | 2.568    |
| H21  | H14 <sup>5</sup>  | 3.080    | H21  | H16 <sup>5</sup>  | 2.782    |
| H22  | O1 <sup>1</sup>   | 2.728    | H22  | O4 <sup>5</sup>   | 2.699    |
| H22  | C3 <sup>14</sup>  | 3.265    | H22  | C19 <sup>11</sup> | 3.217    |
| H22  | H5 <sup>14</sup>  | 2.644    | H22  | H10 <sup>1</sup>  | 3.466    |
| H22  | H14 <sup>5</sup>  | 3.338    | H22  | H15 <sup>11</sup> | 2.822    |
| H22  | H16 <sup>5</sup>  | 3.047    | H22  | H16 <sup>11</sup> | 2.718    |

Symmetry Operators:

(1)  $-X+1/2, -Y+1, Z+1/2$ (3)  $X+1, Y, Z$ (5)  $-X+1, Y+1/2, -Z+1/2+1$ (7)  $X+1/2-1, -Y+1/2, -Z+1$ (9)  $X+1/2, -Y+1/2, -Z+1$ (11)  $-X+2, Y+1/2, -Z+1/2+1$ (13)  $-X+2, Y+1/2-1, -Z+1/2+1$ (2)  $X-1, Y, Z$ (4)  $X+1/2, -Y+1/2+1, -Z+1$ (6)  $-X+1/2+1, -Y+1, Z+1/2-1$ (8)  $-X+1/2, -Y+1, Z+1/2-1$ (10)  $-X+1, Y+1/2-1, -Z+1/2+1$ (12)  $X+1/2-1, -Y+1/2+1, -Z+1$ (14)  $-X+1/2+1, -Y+1, Z+1/2$
